# Supplementary material for: Stochastic processes dominate the community assembly of ectomycorrhizal fungi associated with Betula platyphylla in Inner Mongolia, China
Source: PeerJ. 2025 May 19;13:e19364. doi: 10.7717/peerj.19364 (PMC12097238; doi:10.7717/peerj.19364)
Supplement: Supplemental Information 2 — TN, soil total nitrogen; TOC, total organic carbon; AK, available potassium; AP, available phosphorus; SWC, soil water content; EC, soil electrical conductivity. [file peerj-13-19364-s002.xlsx]

## Sheet: env
Supplementary Table 1. Sampling sites and environmental variables in present study.
sampling sites	latitude (°)	longitude (°)	altitude(m)	TN/(g.kg-1)	TOC（%）	AK/(g.kg-1)	AP/(mg.kg-1)	SWC/%	pH	EC（us/cm）
Helan Mountain National Nature Reserve(HLS)	38.6608	105.862	2010	2.329	3.151	0.213	5.2	17.612	8.46	137.8
	38.6608	105.862	2013	2.307	3.121	0.219	5.3	17.075	8.57	131.9
	38.6608	105.862	2024	2.330	3.191	0.215	5.5	17.871	7.51	142.1
Erlongshitai National Forest Park (ELST)	40.8772	110.310000	1997	3.397	4.439	0.169	6.4	12.045	7.26	67.9
	40.8772	110.310000	1969	3.395	4.406	0.169	6.5	10.46	8.25	68.2
	40.8772	110.310000	1945	3.381	4.390	0.168	6.5	14.946	6.96	72.0
Hardman National Forest(HDM)	41.1406	111.646	1900	3.387	4.001	0.196	6.4	10.838	6.8	53.0
	41.1406	111.646	1905	3.428	4.032	0.202	5.5	11.742	6.86	58.5
	41.1406	111.646	1907	3.397	3.981	0.195	5.3	11.091	7.18	64.6
Wulanba Nature Reserve(WLB)	45.777200	119.006900	1760	2.843	3.222	0.203	4.0	22.377	5.9	51.3
	45.777200	119.006900	1762	2.804	3.227	0.207	3.8	23.106	6.16	52.4
	45.777200	119.006900	1763	2.843	3.148	0.202	4.4	23.324	6.19	49.7
Gen He National Forest Park(GH)	50.876900	121.621900	838	3.362	7.583	0.223	22.0	36.115	4.91	67.1
	50.876900	121.621900	844	3.282	7.664	0.214	21.3	35.899	4.86	55.7
	50.876900	121.621900	846	3.343	7.662	0.217	15.3	35.873	4.84	57.0
