# Supplementary material for: Stochastic processes dominate the community assembly of ectomycorrhizal fungi associated with Betula platyphylla in Inner Mongolia, China
Source: PeerJ. 2025 May 19;13:e19364. doi: 10.7717/peerj.19364 (PMC12097238; doi:10.7717/peerj.19364)
Supplement: Supplemental Information 3 — 295 ectomycorrhizal fungal OTUs were obtained after identification and flattening of EM fungi for analysis of fungal community composition. GH, Genhe; WLB, Wulanba; HDM, Hademen; ELST, Erlongshitai; HLS, Helanshan. [file peerj-13-19364-s003.xlsx]

## Sheet: EM_OTU_table
OUT	sequence	Unite_tax	Unite_qcovs	Unite_evalue	Unite_pident	Unite_tax.1	kidon	phylum	class	order	family	genus	lineage	ELSTBp1	ELSTBp2	ELSTBp3	GHBp1	GHBp2	GHBp3	HDMBp1	HDMBp2	HDMBp3	HLSBp1	HLSBp2	HLSBp3	WLBBp1	WLBBp2	WLBBp3
OTU_1	TCGTATAACAGAGGTGTAAGGGCTGTCGCTGACCTTTAAAGGTTGTGCACGCCTAAGCCCTCTCACAATCCATCTCACCCCTTTTGTGCATCACCGCGTGGGTCCTCCCTTTGCCGGGAGGGCCTGCGTTTTTATATAAAACTTGACACAATGTAGAATGTTTTCTTTTTTGCAATTATATGCAATCAATA	MG386712|k__Fungi;p__Basidiomycota;c__Agaricomycetes;o__Russulales;f__Russulaceae;g__Russula;s__Russula_dryadicola|SH1607389.08FU	100	2e-96	100	MG386712	Fungi	Basidiomycota	Agaricomycetes	Russulales	Russulaceae	Russula	russula-lactarius	680	785	649	15	22	18	1	0	2	0	1	0	0	0	0
OTU_2	TTGAAATAAACCTGATGGGTTGTTGCTGGTTCTCTAGGGAGCATGTGCACGCCTTGTCATCTTTATATCTCCACCTGTGCACTTTTTGTAGACCTTTCAGGTCTATGTTGCTTCATTTACCCCAATGTATGTTAATAGAATGTTGTGGCTATATAAATATATA	MH930161|k__Fungi;p__Basidiomycota;c__Agaricomycetes;o__Agaricales;f__Cortinariaceae;g__Cortinarius;s__Cortinarius_ferrugineovelatus|SH1545309.08FU	100	5e-77	98.77	MH930161	Fungi	Basidiomycota	Agaricomycetes	Agaricales	Cortinariaceae	Cortinarius	cortinarius	41	40	23	9	1	0	545	357	244	0	117	0	1	0	1
OTU_11	TTGATTTTGATTTGTTACCTTCTGTGCTGGCTCCGGCATGTGCACGTTGGTGACTTCATCCAATACCCTTTTGTGAACCTTTGGCCTCATGCCGGCTTTGGCTGGCAGAGGATTTCTACACAAACCTGAATGTAACAGAAAGACCTTGTTGTGCGCAAGCACTAATGTA	HQ445495|k__Fungi;p__Basidiomycota;c__Agaricomycetes;o__Sebacinales;f__Sebacinaceae;g__Sebacina;s__Sebacina_sp|SH1572383.08FU	100	1e-73	96.47	HQ445495	Fungi	Basidiomycota	Agaricomycetes	Sebacinales	Sebacinaceae	Sebacina	sebacina	0	0	0	0	0	0	0	0	0	619	157	487	0	0	0
OTU_3	TAGAATTATTTATTGGTTGTAGCTGGTCTTCGCAAGATGACAATGTGCACACCTTTATTCATCAATCACACCCTGTGCACCTTTTGTAGACTTTGTTGTCTATGTTTTTCATATACACACTCCATAAAGTTTAGAATGTTTTGGTTTTGGAAATAATTAATA	JF908063|k__Fungi;p__Basidiomycota;c__Agaricomycetes;o__Agaricales;f__Hygrophoraceae;g__Hygrophorus;s__Hygrophorus_speciosus|SH1508833.08FU	100	2e-80	100	JF908063	Fungi	Basidiomycota	Agaricomycetes	Agaricales	Hygrophoraceae	Hygrophorus	hygrophorus	0	0	0	374	377	416	0	0	0	0	0	0	0	0	0
OTU_16	TTGAAATAGCATGACGAGTTGTCGCTGGCCTTTTTGACCGTGCACGCTCTGTCGTTCTTCATTTCTCCATCTATTTGTGCACCTCTTGCGTAGACCTTTTCTGAGGGCTTCCTCGGGTCGTTAGGACTGCTTTGCAAAAATTGAATTTGTGGGCTTTCCTTGTCGCTACCACACATACACCAGTGTAATCGTTTAGAAGGAAATGGAATTTGATGCATAATA	KP783442|k__Fungi;p__Basidiomycota;c__Agaricomycetes;o__Agaricales;f__Inocybaceae;g__Inocybe;s__Inocybe_maculata|SH1553917.08FU	100	2e-113	100	KP783442	Fungi	Basidiomycota	Agaricomycetes	Agaricales	Inocybaceae	Inocybe	inocybe	10	5	12	0	0	0	3	30	19	0	2	0	255	264	358
OTU_5	TCATACAACTGAGGCACAAGGGCTGTCGCTGACTTTTTCGTCGTGCACGCCCAAGTGCTCTCAAACAATCCATCTCACCCTATGTGCACCACCGCGTGGGTCCCCTTTTGGCTCGTCCCGAGGGGGGCTCGCGTTTTCACACAAACTAAACACAGTGTAGAATGTCCTTCTTTGCGATCACACGCAATTAATA	KF002779|k__Fungi;p__Basidiomycota;c__Agaricomycetes;o__Russulales;f__Russulaceae;g__Russula;s__Russula_gracillima|SH1509027.08FU	100	2e-97	100	KF002779	Fungi	Basidiomycota	Agaricomycetes	Russulales	Russulaceae	Russula	russula-lactarius	0	0	0	1	0	0	195	87	78	0	0	0	84	149	138
OTU_17	TTGAATGAAGCTTCTGGCTGGATGCTGTTGTGCTGGCCCTTTGGGGCAATGTGCACACACCCTCTGGTCATTTGTTTCTTCTGTTCCACCTGTGCACTGCCTGTAGACACTCTGTGTCTATGATATATGTCACACACACACATACAGTTGTTAAGGCATATCACATATTTATGTATAAAAATAAAAATA	UDB025367|k__Fungi;p__Basidiomycota;c__Agaricomycetes;o__Agaricales;f__Amanitaceae;g__Amanita;s__Amanita_sp|SH1611404.08FU	100	3e-95	100	UDB025367	Fungi	Basidiomycota	Agaricomycetes	Agaricales	Amanitaceae	Amanita	amanita	0	0	0	0	0	0	0	0	1	0	0	0	243	187	162
OTU_9	TTGAAATAAACCTGATGGGTTGTTGCTGGCTCTCTAGGGGGCATGTGCACACCTTGTCATCTTTATATCTCCACCTGTGCACTTTTTGTAGACCTTTCAGGTCTATGTTGCTTCATTTACCCCAATGTATGTTAATAGAATGTTGTGACTATATAATATATA	MH038131|k__Fungi;p__Basidiomycota;c__Agaricomycetes;o__Agaricales;f__Cortinariaceae;g__Cortinarius;s__Cortinarius_sp|SH1545228.08FU	100	2e-80	100	MH038131	Fungi	Basidiomycota	Agaricomycetes	Agaricales	Cortinariaceae	Cortinarius	cortinarius	0	0	0	0	0	0	116	164	200	0	84	0	0	0	0
OTU_13	TTGAAATAAACCTGATGGGTTGTTGCTGGTTCTCTAGGGAGCATGTGCACACCTTGTCATCTTTATATCTCCACCTGTGCACCTTTTGTAGACCTTTCAGGTCTATGTTGCTTCATTTACCCCAATGTATGTTAATAGAATGTTGTGCCCTATATAATATATA	KX355532|k__Fungi;p__Basidiomycota;c__Agaricomycetes;o__Agaricales;f__Cortinariaceae;g__Cortinarius;s__Cortinarius_diasemospermus|SH1545221.08FU	100	7e-81	100	KX355532	Fungi	Basidiomycota	Agaricomycetes	Agaricales	Cortinariaceae	Cortinarius	cortinarius	66	52	60	7	7	17	48	105	95	4	0	0	29	37	20
OTU_4	TCGTACAACGGAGGCGCGAGGGCTGTCGCTGACCTTCAAAGGTCGTGCACGCCCGGGCCCTCTCACAATCCATCTCACCCTTTGTGCATCACCGCGTGGGTCCCCTTTGCGGGAGGGCTCACGTTTTCACATAAAACTCGATACAGTGTAGAATGTTTATTTTTGCGGTCACACGCGATCAATA	KF617367|k__Fungi;p__Basidiomycota;c__Agaricomycetes;o__Russulales;f__Russulaceae;g__Russula;s__Russula_sp|SH1625348.08FU	100	2e-92	100	KF617367	Fungi	Basidiomycota	Agaricomycetes	Russulales	Russulaceae	Russula	russula-lactarius	0	0	0	169	175	182	0	0	0	0	0	0	0	0	0
OTU_6	TCGTACAACTGAGGTGCAAGGGCTGTCGCTGACCTTCAAGGGTCGTGCACGCCCAAGCCCTCTCACACATCCATCTCACCCCTTTGTGCATCACCGCGTGGGCCCCCCTTTGCAGGAGGGCTTGCGTTTTCACATAAAACTTGATACAGTGTAGAATGTTTTTTCTTTTCTTTTGCGGTCACACGCAATCAATA	UDB036974|k__Fungi;p__Basidiomycota;c__Agaricomycetes;o__Russulales;f__Russulaceae;g__Russula;s__Russula_pubescens|SH1538902.08FU	100	5e-98	100	UDB036974	Fungi	Basidiomycota	Agaricomycetes	Russulales	Russulaceae	Russula	russula-lactarius	0	0	0	195	125	123	0	0	0	14	68	0	0	0	0
OTU_8	TTGAATTTTGAAAGAGGTTGTAGCTGATCATTAATAAGATATGTGCACACCTTGTTTCCAAATTTTTACACCATGTGCACTTTTTGTAGGCCGACTTCTGTTGGTCTATGTCTTTTTTAAACACTCAAAAGTTTAGAATGTTAAAACACAAGCTTTGCTTTGTTGCAAGCTTTAAAATTAATA	UDB037615|k__Fungi;p__Basidiomycota;c__Agaricomycetes;o__Agaricales;f__Hygrophoraceae;g__Hygrophorus;s__Hygrophorus_hedrychii|SH1577726.08FU	100	5e-88	98.91	UDB037615	Fungi	Basidiomycota	Agaricomycetes	Agaricales	Hygrophoraceae	Hygrophorus	hygrophorus	130	81	303	0	0	0	0	0	0	0	0	0	0	0	0
OTU_25	ATGATACGAATCGTTGCCTTCAGTGCTGGCCAGATCCTGGCAAGTGCACGTCGGTGACTTTCATCCAATACCCTGTGAACCTTTGGCCTCTTGCTAGCTTTGGCCGGCAGAGGAATTTTACACAAACTCGAATGTAATGAAATATATTGTCGTGCGCAAGCACTAATGTA	KX510026|k__Fungi;p__Basidiomycota;c__Agaricomycetes;o__Sebacinales;f__Sebacinaceae;g__Sebacina;s__Sebacina_sp|SH1561874.08FU	100	4e-83	99.42	KX510026	Fungi	Basidiomycota	Agaricomycetes	Sebacinales	Sebacinaceae	Sebacina	sebacina	0	0	0	0	0	0	71	28	23	80	71	105	0	0	0
OTU_28	TCGTACAACTGAGGCGCGAGGGCTGTCGCTGACTTTTCGTCGTGCACGCCCGAGCGCTCTCATACATCCACCTCACCCCTATGTGCACCACCGCGTGGGTCCCCTCTCGGGGGGGCTCGCGTTTTCACACACAAACTCGATACAGTGTAGAATGTCCTTCTTTGCGATCACACGCAATTAATA	KT334747|k__Fungi;p__Basidiomycota;c__Agaricomycetes;o__Russulales;f__Russulaceae;g__Russula;s__Russula_sp|SH1509021.08FU	100	6e-92	100	KT334747	Fungi	Basidiomycota	Agaricomycetes	Russulales	Russulaceae	Russula	russula-lactarius	59	75	63	0	0	0	16	24	29	86	0	17	0	0	0
OTU_46	ATGATTGCGAATGGTTGCCTTCGGTGCTGGCTCTTGCAAGTGCACGTTGGTGGCTTTCATCCAATACCCCTGTGAACCTTTGGCCTCTTGCTAGCTTCGGCTGGCAGAGGATTTTTACACACTCGAATGTAATGAAAACTATTGTCGTGCGCAAGCACTAATGTA	UDB026611|k__Fungi;p__Basidiomycota;c__Agaricomycetes;o__Sebacinales;f__Sebacinaceae;g__Sebacina;s__Sebacina_sp|SH1561855.08FU	100	5e-82	100	UDB026611	Fungi	Basidiomycota	Agaricomycetes	Sebacinales	Sebacinaceae	Sebacina	sebacina	1	1	0	0	0	0	9	4	9	14	128	16	20	154	1
OTU_30	TTGAATGAAACTTCTGGCTGGATGCTGTTGTGCTGGCCCTTTGAGGCAATGTGCACACCTCTGGTCATTTGTTTGTTCTGTTCCACCTGTGCACTGCCTGTAGACACTCTGTGTCTATGATATGTTACACACACACAATGTATGCATATTTGGTTGGCATATTACATGCAATAAATTATAATA	UDB038027|k__Fungi;p__Basidiomycota;c__Agaricomycetes;o__Agaricales;f__Amanitaceae;g__Amanita;s__Amanita_arctica|SH1611312.08FU	100	1e-89	99.45	UDB038027	Fungi	Basidiomycota	Agaricomycetes	Agaricales	Amanitaceae	Amanita	amanita	0	0	0	0	0	0	0	0	0	0	0	0	115	107	96
OTU_27	ATGAGTTGTGATGGGGTTTGATGCTGGCAGCCAATTTTTGGATGCATGTGCTTGCCCTAACAATCATCTTCCAAACACCTGTGCACATTTTTGAGGGAGTTTCGAGTTTTATTGCCGTTTTTGGTGATTTTCTTGTATTCCCTTGAATTATTATACGCTGTTAACAATGATGAACGTGCTCTGTGCCGCAAGGCCATTAATATAATA	MG720469|k__Fungi;p__Basidiomycota;c__Agaricomycetes;o__Cantharellales;f__Clavulinaceae;g__Clavulina;s__Clavulina_coralloides|SH1546073.08FU	100	3e-105	100	MG720469	Fungi	Basidiomycota	Agaricomycetes	Cantharellales	Clavulinaceae	Clavulina	clavulina	0	0	0	0	0	0	14	32	52	0	0	0	63	75	73
OTU_97	GTGATTGTGAATCGTTGCCTTCAGTGCTGGCTGGTTCCAGCAAGTGCACGTTGGTGACTTTCATCCAAATACCCTTGTGAACCTTTGGCCTCTTGCTGGCTTCGGCTGACAGAGGATTTTACACACCAACTCGAATGTAATGAAAACTACTGTCGTGCGCAAGCACTAATGTA	KX510025|k__Fungi;p__Basidiomycota;c__Agaricomycetes;o__Sebacinales;f__Sebacinaceae;g__Sebacina;s__Sebacina_sp|SH1561888.08FU	100	2e-86	100	KX510025	Fungi	Basidiomycota	Agaricomycetes	Sebacinales	Sebacinaceae	Sebacina	sebacina	5	8	3	0	0	0	2	0	1	78	119	61	0	0	0
OTU_18	TCGTACCACCGAGGTGCAAGGGCTGTCGCTGACCTTTGAAGGTCGTGCACGCCCGAGCGCTCTCGCCACAATCCATCTCACCCCTTTGTGCATCACCGCGTGGGTCCCCCTTTGCGGGGAGGGCTCGCGTTTTCACACAAAACTTGATACAGTCTAGAATGTTTATTTTTGCGGTAACACGCAATCAATA	MK811403|k__Fungi;p__Basidiomycota;c__Agaricomycetes;o__Russulales;f__Russulaceae;g__Russula;s__Russula_sp|SH1509014.08FU	100	8e-96	100	MK811403	Fungi	Basidiomycota	Agaricomycetes	Russulales	Russulaceae	Russula	russula-lactarius	30	10	14	40	6	5	36	73	54	0	0	0	0	1	2
OTU_68	ATGATATAAATTGTCTTACCTTCAGTGCTGGCCCTTGTAAGGGTATGTGCACGTTGGGGGGCATATATCCAACACCCACTTGTGAACCATTGGCCTTTGCTGGCTTCGGCTGGTAGAGGATTTACACAAACACGAATGTAATGAAAAAATGTTGTGCTAAGCACTAATAAA	JX625329|k__Fungi;p__Basidiomycota;c__Agaricomycetes;o__Sebacinales;f__Sebacinaceae;g__Helvellosebacina;s__Helvellosebacina_sp|SH1556814.08FU	100	1e-83	99.42	JX625329	Fungi	Basidiomycota	Agaricomycetes	Sebacinales	Sebacinaceae	Helvellosebacina	sebacina	5	8	3	0	0	0	10	4	16	27	112	37	0	0	0
OTU_35	TTGAAATTATAGGCAAAGGTTGTAGCTGGCCTCTCGGGGCATGTGCACGCCTGAGCCCCTTAATCCACACACACCTGTGAACCAATTGTAAGGGCCCCCTGAAAAGGGCCTTTACGTCTTATTCATCAACCCATTGCATGTCTCAGAATGTAAACATATGTCCTCGCCTTAAAAAGCGTTGATAAACTTATA	MN046996|k__Fungi;p__Basidiomycota;c__Agaricomycetes;o__Atheliales;f__Atheliaceae;g__Piloderma;s__Piloderma_bicolor|SH1544805.08FU	100	6e-97	100	MN046996	Fungi	Basidiomycota	Agaricomycetes	Atheliales	Atheliaceae	Piloderma	piloderma	0	0	0	36	49	39	0	0	0	0	97	0	0	0	0
OTU_24	ATGAGTTGTAACGGGGTTTTGATGCTGGCAGGCCAATTCTTTTGGTATGCATGTGCTCGCTCCAACAATCATTTTCCACACACCCGTGCACGTTTTTGAGGGAGCTTCGAGTTTGATTTGCCTCTTTGGGCGATTTTCTTGCATCCCCTCAAACTTCATTATACGCTGTTAACAATGCTGAACGTGCTTTGTGCCGCAAGGCCTTAAACATTAATA	KX444413|k__Fungi;p__Basidiomycota;c__Agaricomycetes;o__Cantharellales;f__Clavulinaceae;g__Clavulina;s__Clavulinaceae_sp|SH1546079.08FU	100	3e-110	100	KY684393	Fungi	Basidiomycota	Agaricomycetes	Cantharellales	Clavulinaceae	Clavulina	clavulina	60	68	54	0	0	0	0	1	0	14	0	20	0	0	0
OTU_108	TTGAAAAACTATGTTAGTTTTTTTATATCCCATTGTTTTATCTACCCTGTTGCTTCTACTGGACTGTTTTACTTGGAGGTAAGATTTACCTCTAGGTAAAACCTCAGGCTTGTGTGAACCACACTTGCCAGAGAGCTGCCAGTAGCAAGACCACTTGCTAAAACCTGTTGTGAAATATATAGTCTGAATTTTTGTGTCTTGAAAATGAAATA	KX444371|k__Fungi;p__Ascomycota;c__Pezizomycetes;o__Pezizales;f__Pezizaceae;g__Peziza;s__Pezizaceae_sp|SH1630808.08FU	100	4e-104	99.06	KY684488	Fungi	Ascomycota	Pezizomycetes	Pezizales	Pezizaceae	Peziza	terfezia-peziza	2	4	3	0	0	0	0	4	0	44	33	121	0	0	0
OTU_21	TTGATTTTGATTTGTTACCTTCTGTGCTGGCTCCGGCATGTGCACGTTGGTGACTTTCATCCAATACCCTTATGTGAACCTTTGGCCTCTTGCCGGCTTTGGCTGGCAGAGGATTTACACAAACTTGAATGTAACAGAAAGACCTTGTTGTGCGCAAGCACTAATGTA	HQ445495|k__Fungi;p__Basidiomycota;c__Agaricomycetes;o__Sebacinales;f__Sebacinaceae;g__Sebacina;s__Sebacina_sp|SH1572383.08FU	100	1e-83	100	HQ445495	Fungi	Basidiomycota	Agaricomycetes	Sebacinales	Sebacinaceae	Sebacina	sebacina	0	0	0	0	0	0	17	16	35	0	0	0	34	84	21
OTU_12	TCGTACAACGGGGGTGCGAGGGCTGTCGCTGACCTTTCAAAAGGTCGTGCACGCCCGAGCGCTCTCACACATCCATCTCACCCCTTTGTGCATCACCGCGTGGGTCCCCCTTTGCAGGAGGGCTCACGTTTTCACACAAAACTTGATACAGTGTAGAATGTTATTTTTGCGGTCACACGCAATCAATA	LC192788|k__Fungi;p__Basidiomycota;c__Agaricomycetes;o__Russulales;f__Russulaceae;g__Russula;s__Russula_risigallina|SH1538849.08FU	100	1e-94	100	LC192788	Fungi	Basidiomycota	Agaricomycetes	Russulales	Russulaceae	Russula	russula-lactarius	0	0	0	62	61	78	0	0	0	0	0	0	0	0	0
OTU_49	TCGTACAACCGAGGTGCAAGGGCTGTCGCTGACCCTTCAAAGGTCGTGCACGCCCGAGCGCTCTCACCACAATCCATCTCACCCCTTTTGTGCATCACCGCGTGGGTCCCCCCTTTGCGGGAGGGCTCGCGTTTTCACATAAAACTTGATACAGTCTAGAATGTTTATTTTTGCGGTCACACGCAATCAATA	MG687329|k__Fungi;p__Basidiomycota;c__Agaricomycetes;o__Russulales;f__Russulaceae;g__Russula;s__Russula_sp|SH1509069.08FU	100	1e-89	97.93	MG687329	Fungi	Basidiomycota	Agaricomycetes	Russulales	Russulaceae	Russula	russula-lactarius	0	0	0	0	0	0	0	0	0	0	0	0	89	32	54
OTU_69	TTGAAATAAACCTGATGGGTTGTTGCTGGCTCTCTAGGGAGCATGTGCACGCCTTGTCATCTTTATATCTCCACCTGTGCACCTTTTGTAGACCTTTCGGGGTCTATGTTGCTTCATTTTTCCACAATGTATGTTAATAGAATGTTGTGCCCTGTATAATATATA	MH324454|k__Fungi;p__Basidiomycota;c__Agaricomycetes;o__Agaricales;f__Cortinariaceae;g__Cortinarius;s__Cortinarius_saniosus|SH1545232.08FU	100	5e-82	100	MH324454	Fungi	Basidiomycota	Agaricomycetes	Agaricales	Cortinariaceae	Cortinarius	cortinarius	0	0	0	0	0	0	0	0	0	0	0	0	95	36	41
OTU_130	TTGAAATAAACCTGATGGGTTGTTGCTGGCTCTCTAGGGAGCATGTGCACGCCTTGTCATCTTTATATCTCCACCTGTGCACTTTTTGTAGACCTTTCAAGGTCTATGTTGCTTCATTTTACCCCAATGTATGTTAATAGAATGTTGTGCCTATATAATATATA	KC791109|k__Fungi;p__Basidiomycota;c__Agaricomycetes;o__Agaricales;f__Cortinariaceae;g__Cortinarius;s__Cortinarius_sp|SH1172922.08FU	100	9e-80	99.39	KC791109	Fungi	Basidiomycota	Agaricomycetes	Agaricales	Cortinariaceae	Cortinarius	cortinarius	0	2	3	1	0	0	29	64	68	0	0	0	0	0	0
OTU_15	TCATACAACCGAGGCACGAGGGCTGTCGCTGACGTTTTCGTCGTGCACGCCCAAAGCGCTCTCACACATCCATCTCACCCTTATGTGCACCACCGCGTGGGTCCCCCCTTTTGAAGGGGGGGCTCGCGTTTTCATACAAACTTGACGCAGTGTAGAATGTCTTTATATTTTGCGATCACACGCAATCAATA	UDB037568|k__Fungi;p__Basidiomycota;c__Agaricomycetes;o__Russulales;f__Russulaceae;g__Russula;s__Russula_consobrina|SH1509044.08FU	100	2e-96	100	UDB037568	Fungi	Basidiomycota	Agaricomycetes	Russulales	Russulaceae	Russula	russula-lactarius	0	0	0	48	38	54	0	0	0	0	0	0	1	0	0
OTU_20	CTGAATTGTCAACAAGAGTTGTTGCTGGTCCTCAAACAGGGGACATGTGCACACTCTGTTCACACATCCACTCACACCTGTGCACCCTCTGTAGTCCTACATTGGGGGGACCTGTCCTCCTGCTGTGGTTCTGCGTTTTTACATATACACTGTAACAAAGTCTTATGGGATGTATGCCGCGTTTAACGCAATACAATA	KP814220|k__Fungi;p__Basidiomycota;c__Agaricomycetes;o__Thelephorales;f__Thelephoraceae;g__Tomentella;s__Tomentella_sp|SH1502782.08FU	100	3e-100	100	KP814220	Fungi	Basidiomycota	Agaricomycetes	Thelephorales	Thelephoraceae	Tomentella	tomentella-thelephora	0	0	0	0	0	0	35	25	65	3	0	3	0	0	0
OTU_180	TTGAAATAAACCTGATGGGTTGTTGCTGGTTCTCTAGGGAGCATGTGCACGCCTTGTCATCTTTATATCTCCACCTGTGCACTTTTTGTAGACCCTCCTGGGTCTATGTTGCTTCATTTACCCCCAATGTATGTTAATAGAATGTTGTGCCTATTTAATAAATA	UDB026042|k__Fungi;p__Basidiomycota;c__Agaricomycetes;o__Agaricales;f__Cortinariaceae;g__Cortinarius;s__Cortinarius_sp|SH1545526.08FU	100	4e-78	98.78	UDB026042	Fungi	Basidiomycota	Agaricomycetes	Agaricales	Cortinariaceae	Cortinarius	cortinarius	6	10	5	0	0	0	0	0	0	0	104	0	0	0	0
OTU_26	CTGATTGCGAATCGTTGCCTTCAGTGCTGGCCGGCTTCGGCAAGTGCACGTCGGTGACTTTCATCCAATACCCTGTGAACCTTTGGCCTCTTGCTAGCTTCGGCCGGCAGAGGATTTTTACACACACTCGAATGTAATGAAATTTATTGTCGTGCGCAAGCACTAATGTA	FJ440936|k__Fungi;p__Basidiomycota;c__Agaricomycetes;o__Sebacinales;f__Sebacinaceae;g__Sebacina;s__Sebacina_sp|SH1521274.08FU	100	9e-85	100	FJ440936	Fungi	Basidiomycota	Agaricomycetes	Sebacinales	Sebacinaceae	Sebacina	sebacina	0	1	0	23	38	52	0	0	0	0	0	0	0	0	0
OTU_74	TCGTACAAAATGTGTGAGGCATGCAATGGCTGTCGCTGACTTTTAACACAAAAGTCGTGCACGCCAGAGCGTGTCCTCTCACATAAAATCCATCTCACCCTTTTGTGCACCACCGCGTGGGCGCCCTTCGGGATCAAACCGATCCAGGAGGGGGCTTGCGTTTTCACACAAAACCCCTTCTTAAAAAGTGTAGAATGACCCCATTTTTGCGATAACACGCAATCAATA	MK675283|k__Fungi;p__Basidiomycota;c__Agaricomycetes;o__Russulales;f__Russulaceae;g__Lactarius;s__Lactarius_sp|SH1519145.08FU	100	7e-117	100	MK675283	Fungi	Basidiomycota	Agaricomycetes	Russulales	Russulaceae	Lactarius	russula-lactarius	0	0	0	0	0	0	0	0	0	0	0	0	33	25	56
OTU_56	TTGATTGCGAATTGTTGTCTTCAGTGCTGGCCAGCTCTGGCAAGTGCACGTTGGCGGCTTTTCATCCAATACCCCTGTGCACCTTTGGCCTCTTGCTAGCCTTGGCCAGCAGAGGATTTTTACACCCACTCGAATGTAATGAAATTATTGTTGTGCGTAAGCACTAATGTA	UDB027313|k__Fungi;p__Basidiomycota;c__Agaricomycetes;o__Sebacinales;f__Sebacinaceae;g__Sebacina;s__Sebacina_sp|SH1513244.08FU	100	3e-85	100	UDB027313	Fungi	Basidiomycota	Agaricomycetes	Sebacinales	Sebacinaceae	Sebacina	sebacina	20	29	8	0	0	0	0	0	0	46	0	10	0	0	0
OTU_89	ATGATTGCGAATCGTTGCCTTCAGTGCTGGCCGGCTTCGGCTTTGGCAAGTGCACGTCGGTGACTTTCATCCAATACCCTGTGCACCTTTGGCCTCTTGCTAGCTTCGGCCGGCAGAGGATTTTACACAAACTCGAATGTAATGAAATTTATTGTGTGCGCAAGCACTAATGTA	JQ666351|k__Fungi;p__Basidiomycota;c__Agaricomycetes;o__Sebacinales;f__Sebacinaceae;g__Sebacina;s__Sebacina_sp|SH1561913.08FU	100	1e-83	98.85	JQ666351	Fungi	Basidiomycota	Agaricomycetes	Sebacinales	Sebacinaceae	Sebacina	sebacina	1	1	0	23	14	14	0	0	1	0	0	0	21	26	12
OTU_122	ATGAAACGAATGTCGAGAAGGGTTGTAGCTGGCCTTTTGGGGCATGTGCACGCCTCGATCGCACGTCTACCTCTCACACCTGTGCACTACGTGTAGCTTGGGGATGATCACGACGTTAGAAATGACGTTGAAAGCCCTAGCTATGATTTTTTATAAACCCATGTACGTTACGGAACGGATGATGTTATAGTGCGTAACAGCACGAATATATA	MK290692|k__Fungi;p__Basidiomycota;c__Agaricomycetes;o__Thelephorales;f__Thelephoraceae;g__Pseudotomentella;s__Pseudotomentella_tristoides|SH1638690.08FU	100	5e-108	100	MK290692	Fungi	Basidiomycota	Agaricomycetes	Thelephorales	Thelephoraceae	Pseudotomentella	pseudotomentella	0	0	0	0	0	0	0	0	0	44	4	65	0	0	0
OTU_1940	TTGAAATAAACCTGATGGGTTGTTGCTGGTTCTCTAGGGAGCATGTGCACACCTTGTCATCTTTATATCTCCACCTGTGCACTTTTTGTAGACCTTTCAGGTCTATGTTGCTTTCATTTACCCCAATGTATGTTAATAGAATGTTGTGCCTATAATAATATATA	JX630338|k__Fungi;p__Basidiomycota;c__Agaricomycetes;o__Agaricales;f__Cortinariaceae;g__Cortinarius;s__Cortinarius_sp|SH1545220.08FU	100	3e-79	99.39	JX630338	Fungi	Basidiomycota	Agaricomycetes	Agaricales	Cortinariaceae	Cortinarius	cortinarius	1	0	0	0	1	24	19	28	40	0	0	0	0	0	0
OTU_37	TTGAATAAGCTTGAACAGGCTGTTTTGCTGGCCCTCTGGGGCAAGTGCACGCTTGTCATCTTTATTTCTCCCCAACTGTGCACATATTGTAGACCCCTGGAATTGAGGATTGTGCGCTGTGCTTTCCTTGCATTTTCTCCAGGTCTATGTTGTTTTACAATCTCTGAATGTTGTTAGAATGTTGGATTGGAAATAATAAATATA	UDB017663|k__Fungi;p__Basidiomycota;c__Agaricomycetes;o__Agaricales;f__Inocybaceae;g__Inocybe;s__Inocybe_pruinosa|SH1650890.08FU	100	7e-82	93.72	UDB017663	Fungi	Basidiomycota	Agaricomycetes	Agaricales	Inocybaceae	Inocybe	inocybe	0	0	0	0	0	0	17	25	39	0	18	0	0	0	0
OTU_32	TCGAATAAACATTTGATAGGCTGTTGCTGGCCCTTCTAGGGTAGTGTGCACGCTTGTCATTTATTTTTCCACCTGTGCACCCTTTTTGTAGACCTAGTCTCTCTAGGTTCTATGTTACTCACATACTCCTACGAATGTAATAGAATGTTGATCTGGGTCTTTGATGCCCATAAAGTTATATA	UDB025590|k__Fungi;p__Basidiomycota;c__Agaricomycetes;o__Agaricales;f__Inocybaceae;g__Inocybe;s__Inocybe_sp|SH1563645.08FU	100	1e-88	98.91	UDB025590	Fungi	Basidiomycota	Agaricomycetes	Agaricales	Inocybaceae	Inocybe	inocybe	0	0	0	0	0	0	18	24	47	0	0	8	0	0	0
OTU_43	ATGAAGTGAAATTGTCTTACCTTCGGTGCTGGCTCTTGTTACTTGTAAAAGAGAATGAGAGCATGTGCACGTTGGAGGGCATATATCCAATCCCCACTTGTGAACCCTTGCCTTTGCTGGCTTCGGCTGGTAGAGGATTTTACACAAACACGAATGTAATGAAATAATGTTGTGCTGAGCACTTATAATA	KX510023|k__Fungi;p__Basidiomycota;c__Agaricomycetes;o__Sebacinales;f__Sebacinaceae;g__Helvellosebacina;s__Helvellosebacina_sp|SH1556815.08FU	100	8e-96	100	KX510023	Fungi	Basidiomycota	Agaricomycetes	Sebacinales	Sebacinaceae	Helvellosebacina	sebacina	0	0	0	0	0	0	30	24	42	0	0	0	0	0	0
OTU_124	TCGAAATAAATCAGATGGGTTGTTGCTGGTTCTCTAGGGAGCATGTGCACGCCTTGTCATCTTTATATCTCCACCTGTGCACTTTTTGTAGACCCTTCAAGGTCTATGTCGCTTCATTTACCCCAAACAAATAATAGAATGTTGTGCCTTTGAAAAATCTATA	KP013198|k__Fungi;p__Basidiomycota;c__Agaricomycetes;o__Agaricales;f__Cortinariaceae;g__Cortinarius;s__Cortinarius_orasericeus|SH1545242.08FU	100	3e-79	99.39	KP013198	Fungi	Basidiomycota	Agaricomycetes	Agaricales	Cortinariaceae	Cortinarius	cortinarius	0	0	0	0	0	0	0	0	0	0	0	0	38	0	57
OTU_1163	TTGATTGCGAATCGTTACCTTCAGTGCTGGCCGGCTTCGGCAAGTGCACGTCGGTGACTTTCATCCAATACCCTGTGCACCTTTGGCCTCTTGCTAGCTTCGGCCGGCAGAGGATTTTACACAAACTCGAATGTAATGAAATATATTGTCGTGCGCAAGCACTAATGTA	HQ154331|k__Fungi;p__Basidiomycota;c__Agaricomycetes;o__Sebacinales;f__Sebacinaceae;g__Sebacina;s__Sebacina_sp|SH1521286.08FU	100	7e-81	98.82	HQ154331	Fungi	Basidiomycota	Agaricomycetes	Sebacinales	Sebacinaceae	Sebacina	sebacina	0	0	0	0	1	1	24	11	41	2	0	12	0	0	0
OTU_1805	TTGAAATTATAGGTGACGGTTGTAGCTGGCCTTTCGGGGCATGTGCACACCCGAGCCCTTAATCCACACACACCTGTGAACCCAATGTAAGGGCCCGTAAAAAGGTCTTTATGTCTTATCACCAACCTTTATGTCTCATAGAATGTAAATCTATATCCTCGCCCTAAAAAGCGTTGATAAAACTTATA	KU871234|k__Fungi;p__Basidiomycota;c__Agaricomycetes;o__Atheliales;f__Atheliaceae;g__Piloderma;s__Piloderma_sp|SH1544814.08FU	100	2e-86	97.35	KU871234	Fungi	Basidiomycota	Agaricomycetes	Atheliales	Atheliaceae	Piloderma	piloderma	0	0	0	15	36	32	0	0	0	0	0	3	0	0	0
OTU_99	TCGAATAAACTTGATCAGGTTGTTGCTGGCCTTTTGAAGGCATGTGCACACTTGTCATCTTTATTTCTCCAACTGTGCACATATTGTAGACCATGGATGTTGTTGCTAATAGCAGATTTGAGAAGTGCTCAGCTTTCTCTTATGCAAGGTCTATGTTATCCATCTTTTACACACTGTTTTAGAATGTTTTTTTTTGGAAATACAAATGTA	MK480525|k__Fungi;p__Basidiomycota;c__Agaricomycetes;o__Agaricales;f__Inocybaceae;g__Inocybe;s__Inocybe_grammata|SH1515786.08FU	100	7e-107	100	MK480525	Fungi	Basidiomycota	Agaricomycetes	Agaricales	Inocybaceae	Inocybe	inocybe	0	0	0	0	0	0	0	0	0	0	0	0	37	10	34
OTU_348	TCGAAACAGAGTGATGGCTGTGGCTGGCCCTTCGGGGCATGTGCACGCCTGATCCCAACACACACCTGTGAACCCACCGTGGGCCTTCGGGCCTATGTATTCTCACCTACCCCAAACGTATACAGAATGGAATATCTAAAAAAACAATA	KP889683|k__Fungi;p__Basidiomycota;c__Agaricomycetes;o__Atheliales;f__Atheliaceae;g__Amphinema;s__Amphinema_sp|SH1648333.08FU	55	7e-16	85.39	KP889683	Fungi	Basidiomycota	Agaricomycetes	Atheliales	Atheliaceae	Amphinema	amphinema-tylospora	0	0	0	0	0	0	0	0	0	0	79	0	0	0	0
OTU_36	ATGATTACGAATGGTTGCCGTCTGTGCTGGCCAGAACTGGCAAGTGCACGGCGGTGGCTTTCATCCAATACCCCTGTGAACCTTTGGCCTCTTGCTAGCTTCGGCCGGCAGAGGAATTTTACACAAACTCGAATGTAATGAAATATATTGTCGTGCGCAAGCACTAATGTA	KF000411|k__Fungi;p__Basidiomycota;c__Agaricomycetes;o__Sebacinales;f__Sebacinaceae;g__Sebacina;s__Sebacina_epigaea|SH1561903.08FU	100	3e-85	100	KF000411	Fungi	Basidiomycota	Agaricomycetes	Sebacinales	Sebacinaceae	Sebacina	sebacina	0	0	0	36	25	17	0	0	0	0	0	0	0	0	0
OTU_156	CAGAATTGTCAACATGAGTTGTTGCTGGCCCCCAAACAGGGGCATGTGCACACTCTGTTCACACATCCACTCACACCTGTGCACCCTCTGTAGTCCTACAGTTGGGAGGACCTGTCCTCCTGCTGTGGTTCTGCGTCTTTACACACACACTGTAACAAAGTCTTATGGGATGTATGCCGCGTTTAACGCAATACAATA	KF297095|k__Fungi;p__Basidiomycota;c__Agaricomycetes;o__Thelephorales;f__Thelephoraceae;g__unidentified;s__Thelephoraceae_sp|SH1568887.08FU	100	3e-90	96.97	KF297095	Fungi	Basidiomycota	Agaricomycetes	Thelephorales	Thelephoraceae	_	tomentella-thelephora	0	0	0	0	0	0	0	0	0	20	0	56	0	0	0
OTU_50	ATGATTGCGAATGGTCACCTTCAGTGCTGGCTCGCAAGAGCAAGTGCACGTTGGTGGCTTTCATCCAATTCCACACCCTGTGAACCTTTGGCCTCTTGCTAGCTTCGGCGGGCAGAGGATTTTACATATATACTCGAATGTAATGAAAACTATTGTTGTGCGCAAGCACTAATATA	KY574399|k__Fungi;p__Basidiomycota;c__Agaricomycetes;o__Sebacinales;f__Sebacinaceae;g__unidentified;s__Sebacinaceae_sp|SH1561864.08FU	100	3e-84	98.86	KY574399	Fungi	Basidiomycota	Agaricomycetes	Sebacinales	Sebacinaceae	Sebacina	sebacina	0	0	0	0	0	0	17	29	14	0	0	10	2	0	1
OTU_1617	TCGAAATTATTGGTGAGGGTTGTAGCTGGCCTTTCGAGGCATGTGCACGCTCGAGCCCTTAATCCACTTTACACCTGTGCACTTAATGTAGGTCGCCCTTAAAAAAGGTGACCTATGTCTTATCATCAACCCATCGTATGTCTCATAGAATGTAAATATATGTCCTCGCCTTAAAAAGCGTTGATAAACTTATA	KP889869|k__Fungi;p__Basidiomycota;c__Agaricomycetes;o__Atheliales;f__Atheliaceae;g__Piloderma;s__Piloderma_sp|SH1544806.08FU	100	4e-89	97.42	KP889869	Fungi	Basidiomycota	Agaricomycetes	Atheliales	Atheliaceae	Piloderma	piloderma	0	0	0	31	21	20	0	0	0	0	0	0	0	0	0
OTU_278	CAGAGTTCGTGCCCTTCGGGGTAGACCTCCCACCCTTTGTATACCTACCTTTGTTGCTTTGGCGGGCCGTCGCAAGACCGGCGGCTTCGGCTGTCGTGTGCCCGCCAGAGGACCCCAAACTCTGAATACAGTGTCGTCTGAGTACTATATAATAGTTA	MK82005|k__Fungi;p__Ascomycota;c__Leotiomycetes;o__Helotiales;f__Helotiaceae;g__unidentified;s__Helotiaceae_sp|SH1522939.08FU	100	4e-78	100	MN450607	Fungi	Ascomycota	Leotiomycetes	Helotiales	Helotiaceae	_	meliniomyces	0	0	0	0	0	0	0	0	0	39	0	31	0	0	0
OTU_48	TCGAATAAACTTGAACAGGCTGTTGCTGGTCTTCTTGTGGGACATGTGCACGCTTGTCATCTTTATCATTTCTCCAACTGTGCACGTATTTTGTAGACCTGGAGGGGGGATGGAATTCGTTCCGAGTGGGGACTGCTGTGCTTCAAAAAAAAAGAGGTCGGCTTTCCCTTTTGAAAGGTCTATGTCACTTTTTCATAAACCAATGTGTCTAGAATGTTGTAATGAATAAAAGTTATAAAAAA	UDB026342|k__Fungi;p__Basidiomycota;c__Agaricomycetes;o__Agaricales;f__Inocybaceae;g__Inocybe;s__Inocybe_sp|SH1562252.08FU	100	1e-124	100	UDB026342	Fungi	Basidiomycota	Agaricomycetes	Agaricales	Inocybaceae	Inocybe	inocybe	31	20	16	0	0	0	0	0	0	0	0	0	0	0	0
OTU_42	TTGAAATTATAGGTGAGGGTTGTAGCTGGCCTCTCGGGGCATGTGCACGCCCGAGCCCTTAATCCACACACACCTGTGAACCTATTGTAAGGGCCCTTAAAAAAGGCCTTTACGTCCTATCATCAACCCATCGTATGTCTCATAGAATGTAAATATATGTCCTCGCCTTAAAAAGCGTTGATAAACTTATA	FJ803945|k__Fungi;p__Basidiomycota;c__Agaricomycetes;o__Atheliales;f__Atheliaceae;g__Piloderma;s__Piloderma_sp|SH1544805.08FU	100	2e-96	100	FJ803945	Fungi	Basidiomycota	Agaricomycetes	Atheliales	Atheliaceae	Piloderma	piloderma	0	0	0	10	51	5	0	0	0	0	0	0	0	0	0
OTU_47	AAAGAATCTGTGCATGCTTTACGCGTACCACAATTCAAACCCACTCTGCGTACCTTACCCGTTGCTTCCGTTGGGCGGCGCTCCCCCTCCAAGCGGGGTGCCACTGAAATGTGCTCCTACCAGCAGTGTAGGAGGTGGCCCACGAATACCTAAACCGTTTGCATTATCTTGCCTTCAGTCTGAATTTTTGTTAATAACAATCTTTA	MK850482|k__Fungi;p__Ascomycota;c__Pezizomycetes;o__Pezizales;f__Pyronemataceae;g__Otidea;s__Otidea_adorniae|SH1616942.08FU	38	1e-24	92.59	MK850482	Fungi	Ascomycota	Pezizomycetes	Pezizales	Pyronemataceae	Otidea	otidea	24	26	16	0	0	0	0	0	0	0	0	0	0	0	0
OTU_129	TTGATTGTGAATGGTTGCCTTCAGTGCTGGCTCCGGCAAGTGCACGCTGGTGACTTCAATCCAATACCCTTGTGAACCATTGGCCTCTTGCTTGCTTCGGCTGGTAGAGGATATTTACACCAACTCGAATGTAATGAAATTATTGTTGTGCGCAAGCACTAATGTA	JQ318640|k__Fungi;p__Basidiomycota;c__Agaricomycetes;o__Sebacinales;f__Sebacinaceae;g__Sebacina;s__Sebacina_sp|SH1561858.08FU	100	1e-82	100	JQ318640	Fungi	Basidiomycota	Agaricomycetes	Sebacinales	Sebacinaceae	Sebacina	sebacina	0	2	3	0	0	0	0	0	0	17	0	41	0	0	0
OTU_138	ATGAAAAACTTCTCAAATAGTTTTTTATATCCCATTGTCTACCTACCATGTTGCTTCCACTGGACATGTTTTACCTTATGTAAGACCTTTGGCTTGTGTGAATAAACTCAAGTCAGAGAGTTGCCAGTGGCAGGACCATTTACCAAAACTTGATTAAAACACATTGTCTGAATCTTTTGCTTCAATATAATA	UDB018584|k__Fungi;p__Ascomycota;c__Pezizomycetes;o__Pezizales;f__Pezizaceae;g__Peziza;s__Peziza_sp|SH1510532.08FU	99	4e-74	93.23	UDB018584	Fungi	Ascomycota	Pezizomycetes	Pezizales	Pezizaceae	Peziza	terfezia-peziza	0	0	0	0	0	0	0	0	0	0	23	0	5	17	17
OTU_59	CCGAATTGTAAACATGGGTTGTTGCTGGTCCTCAAACGGGGGCATGTGCACGCTCTGTTCACACATCCACTCACACCTGTGCACCCACTGTAGTTCTGTGGCCTGGAGGACCTGTCCCCCTTGCCGTGGTTCTATGTCTTTACACACACACCGTAACAAAGTCTTATGGAATGTATACCGCGTCTAACGCATTACAATA	KF514677|k__Fungi;p__Basidiomycota;c__Agaricomycetes;o__Thelephorales;f__Thelephoraceae;g__unidentified;s__Thelephoraceae_sp|SH1502219.08FU	100	4e-94	97.99	KF514677	Fungi	Basidiomycota	Agaricomycetes	Thelephorales	Thelephoraceae	_	tomentella-thelephora	11	9	41	0	0	0	0	0	0	0	0	0	0	0	0
OTU_134	GTGATTAAACTGTTGCCCTCTGTGCTGGCTCTGCAAGTGCACGTCGGTGACTTTCATTCCAATACCCTTGTGAACCTTTGGCCTCTTGCTAGCTTCGGCTGGCAGAGGATTCTACATACAAACTCGCATGTAATGAAACTCTTGTTGTGCACAAGCACTACTATA	UDB0778610|k__Fungi;p__Basidiomycota;c__Agaricomycetes;o__Sebacinales;f__Sebacinaceae;g__Sebacina;s__Sebacina_sp|SH1615388.08FU	100	5e-82	100	UDB0778610	Fungi	Basidiomycota	Agaricomycetes	Sebacinales	Sebacinaceae	Sebacina	sebacina	2	4	0	0	0	0	0	0	0	24	0	29	0	0	0
OTU_162	TTGAAATAGCATGACGAGTTGTCGCTGGCCTTTTCTTTGACCGTGCACGCTCTGTCGTCCTTCATTTCTCCATCTATTTGTGCACCTCTTGCGTAGACCTTTTCTGAGGGCTTCCTCGGGTCGTTAGGACTGCTTTGCAAAAAAAAAAAGAATTTGTGGGCTTTCCTTGTCGCTACCACACATACACCAGTGTAATTGTTTAGAAGGAAATGGAATTTGATGCATAATA	UDB032017|k__Fungi;p__Basidiomycota;c__Agaricomycetes;o__Agaricales;f__Inocybaceae;g__Inocybe;s__Inocybe_cookei|SH1553917.08FU	100	3e-110	98.25	UDB032017	Fungi	Basidiomycota	Agaricomycetes	Agaricales	Inocybaceae	Inocybe	inocybe	0	0	0	0	0	0	0	0	0	0	0	0	14	19	26
OTU_61	TTGAATAAACTTGAACAGGCTGTTGCTGGTCTTTTGTGTAGACATGTGCACGCTTGTCTCATCTTTATCATTTCTCCAACTGTGCACATTTTGTAGACCCTGGAGTCTTTTTGGATTTTGTTCTCAGAGATCAGGACTGCTGTGCTTCTTGTTTTGAGGTCGGCTTTCCTTGCATCTCCAGGTCTATGTTATTTTTCATAATCTCTCAAATGTTCAGAATGGTTGGATACAGGTGCTTTTGTACCTATAAAAGTTATAATA	EU326161|k__Fungi;p__Basidiomycota;c__Agaricomycetes;o__Agaricales;f__Inocybaceae;g__Inocybe;s__Inocybe_sp|SH1506647.08FU	100	7e-133	99.62	EU326161	Fungi	Basidiomycota	Agaricomycetes	Agaricales	Inocybaceae	Inocybe	inocybe	0	0	0	0	0	0	5	31	23	0	0	0	0	0	0
OTU_116	CCGAACTGTCAACACGAGCTGTTGCTGGTCCCCAGACCGGGGGCATGTGCACACTCTGTTTACACATCCATCCACACCTGTGCACCCTCTGTAGTTCTATGGCCTGGGTGACTTTGTCCCCCTTGCTATGGTTCTATGTATTTACACACACACTGCCATAAAGTCTCGTGGAATGTTCGTCGCGTTTAACGCAATACAATA	KY654939|k__Fungi;p__Basidiomycota;c__Agaricomycetes;o__Thelephorales;f__Thelephoraceae;g__unidentified;s__Thelephoraceae_sp|SH1528843.08FU	100	3e-85	95.05	KM576618	Fungi	Basidiomycota	Agaricomycetes	Thelephorales	Thelephoraceae	Tomentella	tomentella-thelephora	0	0	0	0	0	0	0	0	0	0	0	0	16	13	30
OTU_103	TTGAATGAACTTGGTGTGGTTGTTGCTGGCCCTTCTCAGGGCATGTGCACACCCACCATCCTCATCTCTCCACCTGTGCACCTCTTGTAGATTTGGATCTACGTTTTTCATATACCCCATAGCATGTAACAGAATGTATCATTTGGGCGCTTGTGCCTATAAACCTTATA	JQ666552|k__Fungi;p__Basidiomycota;c__Agaricomycetes;o__Agaricales;f__Hymenogastraceae;g__Hymenogaster;s__Hymenogaster_sp|SH1516853.08FU	100	9e-85	100	JQ666552	Fungi	Basidiomycota	Agaricomycetes	Agaricales	Hymenogastraceae	Hymenogaster	hebeloma-alnicola	0	0	0	0	0	0	0	0	0	0	0	0	17	5	36
OTU_60	TTGAAATAAACCTGATGGGTTGTTGCTGGCTCTCCAGGGAGCATGTGCACACCTTGTCATCTTTATATCTCCACCTGTGCACTTTTTGTAGACCTTCTCAGGTCTATGTTGCTTCATTTTACCCCAATGTATGTCAATAGAATGTTGTGCCTATGTAATATATA	KF617941|k__Fungi;p__Basidiomycota;c__Agaricomycetes;o__Agaricales;f__Cortinariaceae;g__Cortinarius;s__Cortinarius_sp|SH1545595.08FU	100	2e-81	100	KF617941	Fungi	Basidiomycota	Agaricomycetes	Agaricales	Cortinariaceae	Cortinarius	cortinarius	0	0	0	10	22	23	0	0	0	0	0	0	0	0	0
OTU_44	TCGAAATAAAACTGAACAGGCTGTTGCTGGTCGGAAGACATGTGCACGCTTGTCCTCTTTATTTTTCCAACTGTGCACATATTGTAGACCTTTTTGAGGGAATGATGGCCAAGGTCTATGTTACATTTAACAACTTGTTGTAGAATGGGGGATATGAAACAAATATA	JF908103|k__Fungi;p__Basidiomycota;c__Agaricomycetes;o__Agaricales;f__Inocybaceae;g__Inocybe;s__Inocybe_giacomi|SH1628290.08FU	100	4e-83	100	JF908103	Fungi	Basidiomycota	Agaricomycetes	Agaricales	Inocybaceae	Inocybe	inocybe	0	0	0	14	26	11	0	0	0	0	0	0	0	0	0
OTU_76	ATGAGTTGTGATGGGGTTTGATGCTGGCAGCCAAATTTTGGATGCATGTGCTTGCCCTGACAATCATCTTCCAAACACCTGTGCACATTTTTGAGGGAGTTTCGAGTTAATTGCCACTTTTGGTGATTTTCTCGCGTTCCCTTAAATTTTATTATACGCTGTTAACAAATGCTGAACGTGCTTTGTGCCGCAAGGCCCTTAATATAATA	MK614842|k__Fungi;p__Basidiomycota;c__Agaricomycetes;o__Cantharellales;f__Clavulinaceae;g__unidentified;s__Clavulinaceae_sp|SH1546076.08FU	100	2e-106	100	MK614842	Fungi	Basidiomycota	Agaricomycetes	Cantharellales	Clavulinaceae	_	clavulina	0	0	0	10	18	4	0	0	0	0	18	0	0	0	0
OTU_307	CAGAACCGTTGACACGAGCTGTGCTGGCCCTCAAAGGGGCACGTGCACGCTCTGTTTACACATCCACTCACACCTGTGCACCCTCTGTAGTTCTATGGCCTCGGGGATCCCATCCCCTTGCTGTGGTCCTACGTATTTACACACACACCGTAACAAAGTCTCATGGAATGTATGTCGCGCTTAACGCAATACAATA	JX630840|k__Fungi;p__Basidiomycota;c__Agaricomycetes;o__Thelephorales;f__Thelephoraceae;g__unidentified;s__Thelephoraceae_sp|SH1140448.08FU	93	2e-86	98.35	JX630840	Fungi	Basidiomycota	Agaricomycetes	Thelephorales	Thelephoraceae	_	tomentella-thelephora	0	0	0	0	0	0	0	0	0	0	29	21	0	0	0
OTU_100	TTGAATAAGCTTGGTTGGGTTGTTGCTGGCTCTTCGGGGCATGTGCACGCCTAACACCAACCTTTTACCACCTGTGCACCTTTTGTAGACCTGGATATCTCTCGAGGAAACTCGGTATGAGGACTGCTGTGCGTCAAAGCCAGCTTTCCTTACATTTCCGGTCTATGTCTTTATATACACCATTTGTATGTCTATGAATGTTATTATCGGACTTGACTGTCCAATAAACCTTATA	MG367246|k__Fungi;p__Basidiomycota;c__Agaricomycetes;o__Agaricales;f__Tricholomataceae;g__Tricholoma;s__Tricholoma_fulvum|SH1520357.08FU	100	5e-119	99.57	MG367246	Fungi	Basidiomycota	Agaricomycetes	Agaricales	Tricholomataceae	Tricholoma	tricholoma	6	4	5	0	0	0	0	32	0	0	0	0	0	0	0
OTU_91	TCGAAATAAATATGAACAGGCTGTTGCTGGTCGGAAGACATGTGCACGCTTGTCCTCTTTATTTTTCCAACTGTGCACATATTGTAGACCTGTGATGTTGTTTTCTTGTTGGGAGAGAATGGCCAGGTCTATGTTACATTTTAACAACGCGTTTTGGAATGTCGGGTACTGGGGATATAACAAATATA	HQ604247|k__Fungi;p__Basidiomycota;c__Agaricomycetes;o__Agaricales;f__Inocybaceae;g__Inocybe;s__Inocybe_cincinnata|SH1628293.08FU	100	2e-91	98.94	HQ604247	Fungi	Basidiomycota	Agaricomycetes	Agaricales	Inocybaceae	Inocybe	inocybe	0	0	0	18	15	14	0	0	0	0	0	0	0	0	0
OTU_52	TCGAAATTATAGGCGAGGGTTGTAGCTGGCCTCCCGGGGCACGTGCACGCCCGAGCCCTTAATCCACACACACCTGTGAACCTATTGTAAGGGCCCGTGAAAAGGCCTTTACGTTTTATCATCAACCCACTGTATGTCTCATAGAATGTAAATCTATATCCTCGCCCTAAAAAGCGTTGATAAAACTTATA	KJ769281|k__Fungi;p__Basidiomycota;c__Agaricomycetes;o__Atheliales;f__Atheliaceae;g__Piloderma;s__Piloderma_sp|SH1544811.08FU	100	2e-96	100	KJ769281	Fungi	Basidiomycota	Agaricomycetes	Atheliales	Atheliaceae	Piloderma	piloderma	0	0	0	20	15	11	0	0	0	0	0	0	0	0	0
OTU_82	TTGAAATAAACCTGATGGGTTGTTGCTGGTTCTTCAGGGAGCATGTGCACGCCTTGTCATCTTTATATCTCCACCTGTGCACTTTTTGTAGACCTTTCAGGTCTATGTTGCTTCATTTACCCCAATGTATGTTAATAGAACGTTGTGCCTATATAATATATA	UDB036375|k__Fungi;p__Basidiomycota;c__Agaricomycetes;o__Agaricales;f__Cortinariaceae;g__Cortinarius;s__Cortinarius_erubescens|SH1545302.08FU	100	5e-77	98.77	UDB036375	Fungi	Basidiomycota	Agaricomycetes	Agaricales	Cortinariaceae	Cortinarius	cortinarius	0	0	0	25	11	10	0	0	0	0	0	0	0	0	0
OTU_141	CCGAGTCGTCGACACGAGTTGTTGCTGGCCCTCAAACGGGGGCATGTGCACGCTCTGTTCACACATCCACTCACACCTGTGCACCCTCTGTAGTTCTATGGTCTGGGGGACGTGTCGTCCTCCTGCCGTGGTTCTGCGTCTTTACACATACACCGTAGTGAAGTCTTATGGAATGTTTGCCGCGTTTAACGCAATACAATA	UDB019730|k__Fungi;p__Basidiomycota;c__Agaricomycetes;o__Thelephorales;f__Thelephoraceae;g__Thelephora;s__Thelephora_penicillata|SH1502506.08FU	99	2e-82	94.47	UDB019730	Fungi	Basidiomycota	Agaricomycetes	Thelephorales	Thelephoraceae	Thelephora	tomentella-thelephora	0	0	0	0	0	0	0	0	0	0	0	0	10	14	22
OTU_55	TCGTAAAATGGGGGTGCCCGGGTTGTCGCTGACTTTTTGTCGTGCACGCCCGAGTGCTCTCACATACAAATATCCATCTCACCCCTTTGTGCATCACCGCGTGCGTCCCCCCTTCCTCGGAGGGGGGTGCTCACGTTTTTAACATCAAACACCCTAGTGTAGAATGTTCTTTGCGCGATCACGCGCGAATCAATA	MK575439|k__Fungi;p__Basidiomycota;c__Agaricomycetes;o__Russulales;f__Russulaceae;g__Russula;s__Russula_brevipes|SH1509930.08FU	100	1e-98	100	MK575439	Fungi	Basidiomycota	Agaricomycetes	Russulales	Russulaceae	Russula	russula-lactarius	0	0	0	10	19	15	0	0	0	0	0	0	0	0	0
OTU_149	TTGAAATTACCGGTGAGGGTTGTAGCTGGCCTTTCGGGGCATGTGCACGCTCGAGCCTTTAATCCAACACACACCTGTGAACCCAATGTAAGGGCCCGTAAAAAAGGCCCCTACGTCTTTATCACCAACTCTGTATTCATAGAATGTAATCCATATCTTCGCCTTAAACAAGCGTTGGTAAACTTTATA	JQ347151|k__Fungi;p__Basidiomycota;c__Agaricomycetes;o__Atheliales;f__Atheliaceae;g__Piloderma;s__Piloderma_sp|SH1544816.08FU	100	3e-95	100	JQ347151	Fungi	Basidiomycota	Agaricomycetes	Atheliales	Atheliaceae	Piloderma	piloderma	0	0	0	0	0	0	1	3	14	0	0	0	12	5	9
OTU_96	TCATGTCATTCAGTCATGCTGCCGCGTGAACTGTACAAATCCACACTGTGTACCTTATCCCTGTTGCTTCCGCTGGGACCGGAGTATTTTCAGAGGAGTTGCCTCTCTCGCATGGTCAATATCTGTGCAGAGAGAGTTGGCAGTTCTCTGGGGCTGTTCTGGATTCACATGCCTGGCGGGAGGATACTTAATCTCTGGGTTTACTATTCCATCTGTCTGATCTATGAACCAAAAAAATGTTA	MG019757|k__Fungi;p__Ascomycota;c__Pezizomycetes;o__Pezizales;f__Pyronemataceae;g__Humaria;s__Humaria_sp|SH1152162.08FU	100	5e-99	93.52	MG019757	Fungi	Ascomycota	Pezizomycetes	Pezizales	Pyronemataceae	Humaria	genea-humaria	26	13	5	0	0	0	0	0	0	0	0	0	0	0	0
OTU_1505	TTGATTGCGAATCGTCGCCGTCAGTGCTGGCCGGCTTCGGCATGTGCACGTCGGTGACTTTCATCCAATACCCTGTGAACCTTTGGCCTCTTGCTAGCTTCGGCCGGCAGAGGATTTTTACACAAACTCGAATGTAATGAAATATATTGTCGTGCGCAAGCACTAATGTA	EF040835|k__Fungi;p__Basidiomycota;c__Agaricomycetes;o__Sebacinales;f__Sebacinaceae;g__Sebacina;s__Sebacinaceae_sp|SH1521277.08FU	100	4e-83	99.41	HM488593	Fungi	Basidiomycota	Agaricomycetes	Sebacinales	Sebacinaceae	Sebacina	sebacina	0	0	0	13	9	20	0	0	2	0	0	0	0	0	0
OTU_464	AAAGTAATATATATTCATTCGAATATACGTTTCAAACCCCTTGTCTAAACTACCTGTTGCTTCCGATCGTTTTGGCTGTACAGTTAGCTGTATAGCCTGGTCGGAAGGTTAACATAAAATATTGTATTTAGAGTCTTCTGAATTTAAAAATAAAAGTTA	KF061020|k__Fungi;p__Ascomycota;c__Pezizomycetes;o__Pezizales;f__Pyronemataceae;g__Pustularia;s__Pustularia_sp|SH1547531.08FU	100	1e-78	100	KF061020	Fungi	Ascomycota	Pezizomycetes	Pezizales	Pyronemataceae	Pustularia	pustularia	0	0	0	0	0	0	0	0	0	0	41	2	0	0	0
OTU_71	TTGATTTTGATTTGTTACCTTCTGTGCTGGCTCCGGCATGTGCACGTTGGTGACTTTCATGCAATACCCTTTTGTGAACCTTTGGCCTCATGCCGGCTTTGGCTGGCAGAGGATTTACACAAACTTGAATGTAACAGAAAGAAATTGTTGTGCGCAAGCACGAATGTA	GU180319|k__Fungi;p__Basidiomycota;c__Agaricomycetes;o__Sebacinales;f__Sebacinaceae;g__Sebacina;s__Sebacina_sp|SH1572385.08FU	99	4e-83	100	GU180319	Fungi	Basidiomycota	Agaricomycetes	Sebacinales	Sebacinaceae	Sebacina	sebacina	0	0	0	19	11	9	0	0	0	0	0	0	0	0	0
OTU_274	CTGAATTGTCAACAAGAGTTGTTGCTGGTCCTCAAATGGGGGCACGTGCACGCTCTGTTCACACATCCACTCACACCCTGTGCACCCTCTGTAGTTCTATGGTCAGGGGGCCTGTCCTCCTGCTGTGGTTCTGCATCTTTACACACACACTGTAACAAAGTCTCATGGAATGCATGCCGCGTTTAACGCAATACAATA	EU563490|k__Fungi;p__Basidiomycota;c__Agaricomycetes;o__Thelephorales;f__Thelephoraceae;g__Tomentella;s__Tomentella_sp|SH1502243.08FU	99	2e-96	98.98	EU563490	Fungi	Basidiomycota	Agaricomycetes	Thelephorales	Thelephoraceae	Tomentella	tomentella-thelephora	0	0	1	0	0	0	0	0	0	4	0	32	0	0	0
OTU_111	TCGAATAAATGTGATAGACTGTTGCTGGCTTCCCTTGGGGAGCATGTGCACGCCTGTCATCTTTGTTTTTCCACCTGTGCACACTTTGTAGAATCCTAGAGAAGTAAAATTGTCTGAGAAAATTGGATAGATTGAGGACTGCTGTGCCCAGGGCCAGCTTTGCCTTGTGTATCTAGGTTCTATGTCATTCACATACTCCTATGAATGTAACAGAATGTTGATCTGGGTCTTTTAGCACCTATAAAAGTTTTATA	FJ904135|k__Fungi;p__Basidiomycota;c__Agaricomycetes;o__Agaricales;f__Inocybaceae;g__Inocybe;s__Inocybe_sp|SH1232006.08FU	100	6e-128	99.22	FJ904135	Fungi	Basidiomycota	Agaricomycetes	Agaricales	Inocybaceae	Inocybe	inocybe	16	13	6	0	0	0	0	0	0	0	0	0	1	0	1
OTU_95	TCGTACAAAATGTGTGAGGCATGCAAGGGCTGTCGCTGACTTTTTAATCACAAAAAGTCGTGCACGCCGGAGCGTGTCCTCTCGCATAAAATCCATCTCACCCTTTTGTGCACCACCGCGTGGGCACCCTTTGGGATCGAACCGATCCAGGAGGGCGCTTGCGTTTTCACACAAACCCCCTTATAAAAGTGTAGAATGACCCCATTTTTGCGATAACACGCAATCAATA	UDB037954|k__Fungi;p__Basidiomycota;c__Agaricomycetes;o__Russulales;f__Russulaceae;g__Lactarius;s__Lactarius_pilatii|SH1519115.08FU	100	2e-117	100	UDB037954	Fungi	Basidiomycota	Agaricomycetes	Russulales	Russulaceae	Lactarius	russula-lactarius	0	0	0	6	17	13	0	0	0	0	0	0	0	0	0
OTU_169	TCGAAATACTGACGACGAGTTGTCGCTGGTTCTGTGCACGCTCGTCGTTCTTAATTTCTCCATCTATTTGTGCACCCCTTGTGTGGATCTGTCCCTCGGGACGATTGGGGACTGCTTTGCGAAACGACCTTTTGCGGGCTTTCCTCGTGTAGATCCTCATTTTCTTCACATACCACTTGTAAATAGAGAAGGGTCGGAATCATAAAATATA	KJ769274|k__Fungi;p__Basidiomycota;c__Agaricomycetes;o__Agaricales;f__Inocybaceae;g__Inocybe;s__Inocybe_sp|SH1538649.08FU	100	2e-107	100	KJ769274	Fungi	Basidiomycota	Agaricomycetes	Agaricales	Inocybaceae	Inocybe	inocybe	0	0	0	0	0	0	1	9	6	0	0	0	12	1	6
OTU_63	TTGAAATAAACCTGATGGGTTGTTGCTGGCTCTCCAGGGAGCATGTGCACGCCTGTTCATCTTTATATCTCCACCTGTGCACCTTTTGTAGACCCTCCCGGGGGTCTATGTCGCTTCATCTACCCCAATGTATGTTAATAGAATGTGTGTGCATATGAAATCTATA	UDB038273|k__Fungi;p__Basidiomycota;c__Agaricomycetes;o__Agaricales;f__Cortinariaceae;g__Cortinarius;s__Cortinarius_betuletorum|SH1551440.08FU	100	1e-82	100	UDB038273	Fungi	Basidiomycota	Agaricomycetes	Agaricales	Cortinariaceae	Cortinarius	cortinarius	0	0	0	8	24	3	0	0	0	0	0	0	0	0	0
OTU_248	TTGATAGTTTTTATTATCAAAAAACCCCTTTGTTTAATCATTTACCCTGTTGCTTCCATTGGACAGACCGGCATTGTGTATACAAGTTGGTCCTCTAGCTTTGTGTTTATTTGGCACTAGCTAGGGAGCTGCCAGTGGATAGAATCCAAACAAAAAATTCGTGAAGAAACATATATTGTCTGATTTATTAGTACAAAAACAATA	KX444435|k__Fungi;p__Ascomycota;c__Pezizomycetes;o__Pezizales;f__Pezizaceae;g__unidentified;s__Pezizaceae_sp|SH1643050.08FU	100	7e-102	99.51	KY684486	Fungi	Ascomycota	Pezizomycetes	Pezizales	Pezizaceae	_	galactinia	4	1	5	0	0	0	0	0	0	3	21	0	0	0	0
OTU_1695	TTGAAATAAACCTGATGGGTTGTTGCTGGTTCTCTAGGGAGCATGTGCACGCCTTGTCATCTTTATATCTCCACCTGTGCACCTTTTGTAGACCTTTCAGGTCTATGTTTGCTTCATTTACCCCTTTGTATGTTAATAGAATGTTGTGCCTATATAATATATA	KU727192|k__Fungi;p__Basidiomycota;c__Agaricomycetes;o__Agaricales;f__Cortinariaceae;g__Cortinarius;s__Cortinarius_sp|SH1545233.08FU	100	7e-81	100	KU727192	Fungi	Basidiomycota	Agaricomycetes	Agaricales	Cortinariaceae	Cortinarius	cortinarius	0	0	0	10	17	6	0	0	0	0	0	0	0	0	0
OTU_320	CTGAATTGTCAACACGAGTTGTTGCTGGTCCTCAAACGGGGGCATGTGCACGCTCTGTTTACACATCCACTCACACCTGTGCACCCTCTGTAGTTCCGTGGCATGGGGGACTCTGTCCTCCTGTCGTGGTTCTACGTCTTTACACACACACTGTAACGAAGTCTCATGGAATGTATGCCGCGTTTAACGCAATACAATA	KC965489|k__Fungi;p__Basidiomycota;c__Agaricomycetes;o__Thelephorales;f__Thelephoraceae;g__unidentified;s__Thelephoraceae_sp|SH1502204.08FU	99	1e-99	100	KC965489	Fungi	Basidiomycota	Agaricomycetes	Thelephorales	Thelephoraceae	_	tomentella-thelephora	0	0	0	0	0	0	1	3	4	18	0	7	0	0	0
OTU_192	TTGATTTTGATTTGTTACCTTCTGTGCTGGCTCCGGCATGTGCACGTTGGTGACTTTCATCCAATACCCATTTGTGAACCTTTGGCCTCATGCTGGCTTTGGCTGGCAGAGGATTTTACACAAACTTGAATGTAACAGAAAGATCTTGTTGTGCGCAAGCACTAATATA	UDB026642|k__Fungi;p__Basidiomycota;c__Agaricomycetes;o__Sebacinales;f__Sebacinaceae;g__Sebacina;s__Sebacina_sp|SH1572359.08FU	100	3e-84	100	UDB026642	Fungi	Basidiomycota	Agaricomycetes	Sebacinales	Sebacinaceae	Sebacina	sebacina	0	5	1	0	0	0	0	0	0	24	0	0	0	0	0
OTU_407	CTGAACTGTCAACATGGGTTGTTGCTGGCCCTCGAGTGGGGGCATGTGCACGCTCTGTTTACACATCCACTCACACCTGTGCACCCTCTGTAGTTCTATGGCGTGGGGGGCCCTGCCCTCCTGCTGTGGTTCTATGTCTTTACACACACACACTGTGATGAAGTCTCATGGAATGTACATCGCGTTTAACGCAATACAATA	KC986276|k__Fungi;p__Basidiomycota;c__Agaricomycetes;o__Thelephorales;f__Thelephoraceae;g__Tomentella;s__Tomentella_sp|SH1528432.08FU	100	1e-94	98.01	KC986276	Fungi	Basidiomycota	Agaricomycetes	Thelephorales	Thelephoraceae	Tomentella	tomentella-thelephora	0	0	0	0	0	0	0	0	0	7	6	11	3	2	0
OTU_205	TTGATTTCAGATTGTCACCTTTTGTGCTGGCTTCGGCATGTGCACACTGGTGACTTTCATCCAACCCCTCTTGTGAACCTTTGACCTTGTGCTATGCCTTTGGCTGGCAGAAGGATTTATTTACACACGTAAAATGAAATGAAAGTATCTTGTTGTGTGCCCACAAGCACAAATGTA	DQ068977|k__Fungi;p__Basidiomycota;c__Agaricomycetes;o__Sebacinales;f__Sebacinaceae;g__Sebacina;s__Sebacina_sp|SH1514836.08FU	100	1e-88	100	DQ068977	Fungi	Basidiomycota	Agaricomycetes	Sebacinales	Sebacinaceae	Sebacina	sebacina	0	0	0	0	0	0	0	0	0	0	0	0	7	13	8
OTU_1381	TCGAATAAACATTTGATAGGCTGTTGCTGGCCCTTCCAGGGTAGTGTGCACGCTTGTCATTTATTTTGTTTATTTTTCCACCTGTGCACCTTTCTGTAGACCCTTAGAATTTGGGGACTGCTGTGCCAAGTGCCAGCTTTTCCTTTGTCTCTCTCTAGGTTCTATGTTCCTCACATACCCCTACGAATGTAATAGAATGTTGATCTGGGTCTTTGATGCCCATAAAAGTTATATA	UDB027500|k__Fungi;p__Basidiomycota;c__Agaricomycetes;o__Agaricales;f__Inocybaceae;g__Inocybe;s__Inocybe_sp|SH1563612.08FU	99	3e-116	99.14	UDB027500	Fungi	Basidiomycota	Agaricomycetes	Agaricales	Inocybaceae	Inocybe	inocybe	0	0	0	0	0	0	1	24	2	0	0	0	0	0	1
OTU_244	CCGAATCGTCAAACACGGGTTGTTGCTGGCCCCTGAACGGGGGCACGTGCACGCTCTGTTTACGCATCCACTCACACCTGTGCACCCTCGGTAGTTCTATGGTTCGGGAGACCCTGTCTTCCTTCCGTGGCTCTACGTCTTTACACACACACGACGTCTCATGGAATGTTTTTCGCGTTTAACGCAATACAATA	UDB037875|k__Fungi;p__Basidiomycota;c__Agaricomycetes;o__Thelephorales;f__Thelephoraceae;g__Tomentella;s__Tomentella_spinosispora|SH1502216.08FU	100	5e-98	100	UDB037875	Fungi	Basidiomycota	Agaricomycetes	Thelephorales	Thelephoraceae	Tomentella	tomentella-thelephora	0	0	0	0	0	0	3	0	8	0	0	0	2	5	7
OTU_335	TCGAATAAAACTTGAACAGGTTGTTGCTGGCTCCTTGGAGCATGTGCACGCTTGTCGTTTTTACTTCATTCTCTCCACTGTGCACCAACTGTAGGTCTGGAGTTTTGATCAAGGACTGCTGTGCTTTCCTTGCATCTTCCAGGGTCTATGTCTTTTTACAATCCCTCAATGTGTTTTGGAATGTTGAATCGTATAATA	JF908229|k__Fungi;p__Basidiomycota;c__Agaricomycetes;o__Agaricales;f__Inocybaceae;g__Inocybe;s__Inocybe_sp|SH1529053.08FU	100	1e-93	97.99	JF908229	Fungi	Basidiomycota	Agaricomycetes	Agaricales	Inocybaceae	Inocybe	inocybe	0	0	0	0	0	0	0	0	0	0	0	0	6	12	7
OTU_88	CTGAATTGTCAACACGAGTTGTTGCTGGTCCTCAAACGGGGGCATGTGCACGCTCTGTTTACACATCCACTCACACCTGTGCACCCTCCGTAGTTCTGGGGCGTGGGGGACTCTGTCCTCCTGCTGTGGTTCTACGTCTTTACACACACACACTGTAACAAAGTCTCATGGAATGTATGCCGCGTTTAACGCAATACAATA	JF506825|k__Fungi;p__Basidiomycota;c__Agaricomycetes;o__Thelephorales;f__Thelephoraceae;g__Tomentella;s__Tomentella_sp|SH1212496.08FU	100	2e-97	98.51	JF506825	Fungi	Basidiomycota	Agaricomycetes	Thelephorales	Thelephoraceae	Tomentella	tomentella-thelephora	0	0	0	0	0	0	7	12	5	0	0	0	0	0	0
OTU_267	TTGAATGAACTTGGTGTGGTTGTCGCTGGCCCTCTTGGGGGCATGTGCACACCTACCATCCTCATCTCTCCACCTGTGCACCTCTTGTAGATTTGGAATTGATTATCCGAGGCAACTCGGTCGTGAGGACTGCTATCACTTAGCTGGCTTTCTTTGCAATTCCAGGTCTATGTTTTTCATATACCCCATTGTATGTAACAGAATGTATCATTGGGCCTTGTGCCTATAAACCTTATA	KM390554|k__Fungi;p__Basidiomycota;c__Agaricomycetes;o__Agaricales;f__Hymenogastraceae;g__Hebeloma;s__Hebeloma_geminatum|SH1563785.08FU	100	8e-122	100	KM390554	Fungi	Basidiomycota	Agaricomycetes	Agaricales	Hymenogastraceae	Hebeloma	hebeloma-alnicola	5	6	6	0	0	0	0	1	1	0	0	5	0	0	0
OTU_291	TTGATTGCGAATCGTTGTCTTCAGTGCTGGCCAGCTCTGGCAAGTGCACGTTGGCGGCTTTTCATCCAATACCCCTGTGAACCTTTGGCCTCTTGCTGGCTTTGGCTGGCAGAGGATTTTTTACACCTGCTCGAATGTAATGAAATTATTGTTGTGCGCAAGCACTACTGTA	KX510021|k__Fungi;p__Basidiomycota;c__Agaricomycetes;o__Sebacinales;f__Sebacinaceae;g__Sebacina;s__Sebacina_sp|SH1513239.08FU	100	7e-86	100	KX510021	Fungi	Basidiomycota	Agaricomycetes	Sebacinales	Sebacinaceae	Sebacina	sebacina	0	0	0	0	0	0	3	2	5	8	0	0	5	0	0
OTU_136	TTGAATAAACTTGAACAGGCTGTTGCTGGGCTCCTTCAAAGGGGGTGTTGTGCACGCTTGTCATCTTTATCTCTCCAACTGTGCACATATTGTAGACCTGGGAGTTGTTTGATTTGTTTCAAGAGTTGGGACTGCTGTGCTTTTTTACAAGTCGGCTTTGCCTTGAATTTTCGGGTCTATGTCATTTTATCACAAACCTATGAATTTGTTTTGAATGTTGAATCAGGTCCTTTTGTACCTTTAAATATAATA	KX254461|k__Fungi;p__Basidiomycota;c__Agaricomycetes;o__Agaricales;f__Inocybaceae;g__Inocybe;s__Inocybe_leptocystis|SH1647005.08FU	100	3e-126	99.21	KX254461	Fungi	Basidiomycota	Agaricomycetes	Agaricales	Inocybaceae	Inocybe	inocybe	15	4	4	0	0	0	0	0	0	0	0	0	0	0	0
OTU_646	CTGAATTGTCAACAAGAGTTGTTGCTGGTCCTCAAATGGGGGCATGTGCACGCTCTGTTCACACATCCACTCACACCTGTGCACCCTCTGTAGTTCTATGGTTAGGGGGGCCTGTCCCTCCCACCATGGTTCTGCGTCTTTACCACACACACTGTAACAAAGTCTCATGGAATGTGTGCCGCGTTTAACGCAATACAATA	KC965815|k__Fungi;p__Basidiomycota;c__Agaricomycetes;o__Thelephorales;f__Thelephoraceae;g__unidentified;s__Thelephoraceae_sp|SH1159727.08FU	100	2e-101	100	KC965815	Fungi	Basidiomycota	Agaricomycetes	Thelephorales	Thelephoraceae	_	tomentella-thelephora	0	0	0	0	0	0	0	0	0	21	0	2	0	0	0
OTU_185	TCGAATTATAATCCGGCGAGGGGAAAGGGGGGAGTTGTCGCTGGCCTTTTACGAGGCATGTGCACGCTCTCCTTGGAACCCTTGCCTTATGGGCGCGGGGCGACCCGCGTCTTCATATACCTCTTCGTGTAGAAAGTCTTTGAATGTTTTTACTATCATCGAGCCGCGACTTCTAGGAGACGCGGTTCTTTGAGACAAAAGTTATTA	KU721471|k__Fungi;p__Basidiomycota;c__Agaricomycetes;o__Boletales;f__Suillaceae;g__Suillus;s__Suillus_grevillei|SH1555179.08FU	100	1e-103	99.52	KU721471	Fungi	Basidiomycota	Agaricomycetes	Boletales	Suillaceae	Suillus	suillus-rhizopogon	0	0	0	3	7	11	0	0	0	0	0	0	0	1	0
OTU_259	ATGATTACGAATGGTTGCCTTCTGTGCTGGCCAACTGGCAAAGTGCACGTTGGTGGCTTTCATCCAATCCCCTGTGAACCTCTGGCCTCTTGCTAGCCTCGGCCGGCAGAGGAATTTTACACAAACTCGAATGTAATGAAATCTATTGTCGTGCGCAAGCACTAATGTA	KC840635|k__Fungi;p__Basidiomycota;c__Agaricomycetes;o__Sebacinales;f__Sebacinaceae;g__Sebacina;s__Sebacina_sp|SH1521295.08FU	100	1e-78	98.22	KC840635	Fungi	Basidiomycota	Agaricomycetes	Sebacinales	Sebacinaceae	Sebacina	sebacina	0	0	0	0	0	0	0	0	0	0	0	0	6	11	5
OTU_390	ATGAAATGAATGTTGAGAAGGGTTGTAGCTGGCCTTTTGGGGCATGTGCACACCCTGATCACACATCCACCTCTCACACTTGTGCACTATGTGTAGCTTGGGATGATTACGATGTTAGAAATGATGTCGAAAGCCCTAGCTATGAATTTTTATAAACTCATATATAAAACTACAGAATGAATGATAGTTATAGCATGTAACAGTGCATATATATATATA	UDB026126|k__Fungi;p__Basidiomycota;c__Agaricomycetes;o__Thelephorales;f__Thelephoraceae;g__Pseudotomentella;s__Pseudotomentella_sp|SH1564294.08FU	100	7e-112	100	UDB026126	Fungi	Basidiomycota	Agaricomycetes	Thelephorales	Thelephoraceae	Pseudotomentella	pseudotomentella	0	0	0	0	0	0	0	1	2	1	1	17	0	0	0
OTU_450	TTGAAATAAACCTGATGGGTTGTTGCTGGTTCTCTAGGGAGCATGTGCACGCCTTGTCATCTTTATATCTCCACCTGTGCACCTTTTGTAGACCTTCCAAGGTCTATGTTGCTTCATTTACCCCAATGTATGTTAATAGAATGTTGTGATTATAAAAATATATA	KX964463|k__Fungi;p__Basidiomycota;c__Agaricomycetes;o__Agaricales;f__Cortinariaceae;g__Cortinarius;s__Cortinarius_cyprinus|SH1545224.08FU	100	2e-81	100	KX964463	Fungi	Basidiomycota	Agaricomycetes	Agaricales	Cortinariaceae	Cortinarius	cortinarius	0	0	0	0	0	0	0	0	0	17	0	5	0	0	0
OTU_220	TTGAATAAACGTGATAGGCTGTTGCTGGCTTTCCCTACCAAAGGGGGGGGCATGTGCACGCCCGTCATCTTTGTTTTTCCACCTGTGCACACTTTGTAGAATCCTAGATAAGTAATTGTCTGAGAAAATCAGATAGGTTGAGGACTGCTGTGTGCCTTTCAATGGGGCCAGCTTTGCCTTGTGTATCTAGGTTCTATGTCATTCACATACTCCTATGAATGTAACAGAATGTTGACCTGGGTCTTTAGCACCTATAAAAGTTATATA	HQ604625|k__Fungi;p__Basidiomycota;c__Agaricomycetes;o__Agaricales;f__Inocybaceae;g__Inocybe;s__Inocybe_sororia|SH1232010.08FU	100	7e-113	94.42	HQ604625	Fungi	Basidiomycota	Agaricomycetes	Agaricales	Inocybaceae	Inocybe	inocybe	0	0	0	0	0	0	6	3	12	0	0	0	0	0	0
OTU_754	TTGAAAAACTATCTTAGTTTTTTATATCCCATTGCTTACCTACCCTGTTGCTTCTACTGGACTTGTTTTACCTTCTTCAGGTAAGACCTCAGGCTTGTGTAAACTACACTTGTCAGAGAGCTGCCAGTAGTAAGACCACTTACAAAAACTTGTCTTGAAATATATCGTCTGAATTTTTTGTCTTGAATGAAATA	MF352739|k__Fungi;p__Ascomycota;c__Pezizomycetes;o__Pezizales;f__Pezizaceae;g__unidentified;s__Pezizaceae_sp|SH1630805.08FU	100	2e-96	99.48	MF352739	Fungi	Ascomycota	Pezizomycetes	Pezizales	Pezizaceae	_	terfezia-peziza	0	0	0	0	0	0	0	0	0	12	0	9	0	0	0
OTU_265	CTGAAGTACCATAACAAGTTGTCGCTGATCCTAGATCGTGCACGCTTGTTATTCTTCATTTCTCCATTATTTGTGCATCACTTGTGTGGATCTTTGTTAGGACTGCTTCGCAAAGTTGCTATTTGTGGGGCTTTCCTTGTATTCTTTTGATCTACATGTTTTTTTTACACACACACCAATGTTTTAGAAGGAATGAAAATGAATTGTTATA	AM882937|k__Fungi;p__Basidiomycota;c__Agaricomycetes;o__Agaricales;f__Inocybaceae;g__Inocybe;s__Inocybe_cervicolor|SH1554217.08FU	99	7e-107	100	AM882937	Fungi	Basidiomycota	Agaricomycetes	Agaricales	Inocybaceae	Inocybe	inocybe	1	1	1	0	0	0	0	0	0	13	0	4	0	0	0
OTU_123	TAGAATTATAAGCGAGGGTTGTCGCTGGCCTTTCGGGGCATGTGCACGCCCGAGCTCTTAAATCCACAACACACCTGTGAACCCACCGTAGGCCTTCGGGCTTATGCATTTATACTCTGTATGTGTCATAGAATGTCATGTTGCATTAAAAACGCAATTAAATA	KP896159|k__Fungi;p__Basidiomycota;c__Agaricomycetes;o__Atheliales;f__Atheliaceae;g__Amphinema;s__Amphinema_sp|SH1648326.08FU	100	2e-81	100	KP896159	Fungi	Basidiomycota	Agaricomycetes	Atheliales	Atheliaceae	Amphinema	amphinema-tylospora	6	1	3	0	0	0	2	2	6	0	0	0	0	0	0
OTU_167	ATGAAATGAATGTCGAGAAGGGTTGTAGCTGGCCTTTTGGGGCATGTGCACACCTTGATCGCACATCCACCTCTCACACCTGTGCACTATGTGTAGCTTGGGATGATTACAATGTCGTAAATGATATTGAAAGCCCTAGCTATGAATTTTTATTATAAACCCATATACAAAGTTATAGAATGGATAATGTTATAGCGTGTAATAGCGCAAATATATA	HE687089|k__Fungi;p__Basidiomycota;c__Agaricomycetes;o__Thelephorales;f__Thelephoraceae;g__Pseudotomentella;s__Pseudotomentella_sp|SH1564288.08FU	100	4e-109	99.54	HE687089	Fungi	Basidiomycota	Agaricomycetes	Thelephorales	Thelephoraceae	Pseudotomentella	pseudotomentella	8	3	1	1	0	0	0	0	0	0	0	6	0	0	0
OTU_118	ATGATTGCGAATGGCTGCCTTCAGTGCTGGCTCTTATGAGCATGTGCACGTTGGTGGCTTTCATCCAATACCCATGTGAACCTTTGGCCTCTTGCTAGCTTTGGCCGGCAGAGGATTTTTATACACACACTCGAATGTAATGAAAACTATTGTCGTGCGCAAGCACTAATGTA	UDB027854|k__Fungi;p__Basidiomycota;c__Agaricomycetes;o__Sebacinales;f__Sebacinaceae;g__Sebacina;s__Sebacina_sp|SH1561865.08FU	100	2e-86	100	UDB027854	Fungi	Basidiomycota	Agaricomycetes	Sebacinales	Sebacinaceae	Sebacina	sebacina	2	5	0	0	0	0	0	0	0	0	0	0	0	5	6
OTU_219	TCGTACAACTGAGGTGCGAGGGCTGTCGCTGACCTTGTGTCGTGCACGCCCGAGTGCTCTCAAACATCCATCTCACCCCTATGTGCACCACCGCGTGGGTCCCCTTTTGGCTCGTTCAGAGGGGGGCTCGCGTTTTCACACAAACTTGATACAGTGTAGAATGTCTTCCTTTGCGATCACACGCAATTAATA	KU176303|k__Fungi;p__Basidiomycota;c__Agaricomycetes;o__Russulales;f__Russulaceae;g__Russula;s__Russula_sp|SH1509038.08FU	100	6e-97	100	KU176303	Fungi	Basidiomycota	Agaricomycetes	Russulales	Russulaceae	Russula	russula-lactarius	0	0	0	4	7	7	0	0	0	0	0	0	0	0	0
OTU_243	TTGAATAAACATTTGATAGGCTGTTGCTGGCCCTTCTGGGGTAGTGTGCACGCTTGTCATTTATTTATTTTTTTCCACCTGTGCACCTTTTTGTAGACCTTGGAGAAAGCAAATTGTCTTGAGCAATCGGGATAGGTTTTGGGGACTGCTGTGCCTTTCGAATGAAGTGCCAGCTTTTCCTTGTCTCTCTAGGTTCTATGTTACTCATATACTCCTACGAATGTAATAGAATGTTGATCTGGGTCTTTGATGCCCATAAAGTTATATA	UDB027569|k__Fungi;p__Basidiomycota;c__Agaricomycetes;o__Agaricales;f__Inocybaceae;g__Inocybe;s__Inocybe_bulbosissima|SH1649738.08FU	100	2e-137	99.63	UDB027569	Fungi	Basidiomycota	Agaricomycetes	Agaricales	Inocybaceae	Inocybe	inocybe	6	5	2	0	0	0	0	1	0	0	0	0	0	2	2
OTU_275	TTGAATGAACTTGGTGTGGTTGTTGCTGGCCCTTTCGGGGGCATGTGCACACCCATCATCCTCATCTCTCCACCTGTGCACCTCTTGTAGACTTGGATTGACTTTCCGAGGCAACTCGGTCGGGAGGACTTGCTGGCAGTAGCTGGCTTTCCTTGCATTTCCAAGTCTATGTTTTTTCATATACCCCATTGAATGTAACAGAATGTAACATATTGGGCCTTTGTGCCTATAAAAACTTATA	UDB036458|k__Fungi;p__Basidiomycota;c__Agaricomycetes;o__Agaricales;f__Hymenogastraceae;g__Hebeloma;s__Hebeloma_mesophaeum|SH1563787.08FU	100	5e-124	100	UDB036458	Fungi	Basidiomycota	Agaricomycetes	Agaricales	Hymenogastraceae	Hebeloma	hebeloma-alnicola	0	0	0	1	1	1	2	4	3	1	0	5	0	0	0
OTU_101	TTGAAATAAACCTGATGGGTTGTTGCTGGTTCTCTAGGGAACATGTGCACGCCTTGTCATCTTTATATCTCCACCTGTGCACTTTTTGTAGACCTTTCCAGGTCTATGTTTGCTTCATTTTACCTCAACTGTATGTCATTAGAATGTTGTGCCTATGTAACATATA	HQ204640|k__Fungi;p__Basidiomycota;c__Agaricomycetes;o__Agaricales;f__Cortinariaceae;g__Cortinarius;s__Cortinarius_sp|SH1545318.08FU	100	5e-77	98.19	HQ204640	Fungi	Basidiomycota	Agaricomycetes	Agaricales	Cortinariaceae	Cortinarius	cortinarius	5	9	3	0	0	0	0	0	0	0	0	0	1	0	0
OTU_1983	TCGAATAAACTTGAACAGGCTGTTGCTGGTCTTCTTGTGGGACATGTGCACGCTTGTCATCTTTATCATTTCTCCAACTGTGCACGTATTTTGTAGACCTGGAGGGGGGATGGAATTCGTTCCGAGTGGGGACTGCTGTGCTTCAAAAAAAAAAGAGGTCGGCTTTCCCTTTGAAAGGTCTATGTCACTTTTTCACAAACCAATGTGTCTAGAATGTTGTAATGAATAAAAGTTATAAAAAA	HQ445016|k__Fungi;p__Basidiomycota;c__Agaricomycetes;o__Agaricales;f__Inocybaceae;g__Inocybe;s__Inocybe_sp|SH1562252.08FU	100	6e-123	99.59	HQ445016	Fungi	Basidiomycota	Agaricomycetes	Agaricales	Inocybaceae	Inocybe	inocybe	9	2	6	0	0	0	0	0	0	0	0	0	0	0	0
OTU_488	CCGAATTGTCAACAAGAGTTGTTGCTGGTCCCTGTATGGGGGCATGTGCACGCTCTGTTTACACATCCACTCACACCTGTGCACCCTCTGTAGTTCTATGGCCTGGGGGGCTCTGTCCTCCTGCTGTGGTCCTACGTCTTTACACACACACCGTAGCAAAGTCTCATGGAATGTATGTCGCGTTTAACGCAATGAAATA	EF655702|k__Fungi;p__Basidiomycota;c__Agaricomycetes;o__Thelephorales;f__Thelephoraceae;g__Tomentella;s__Tomentella_alpina|SH1528478.08FU	100	1e-99	99.5	EF655702	Fungi	Basidiomycota	Agaricomycetes	Thelephorales	Thelephoraceae	Tomentella	tomentella-thelephora	0	0	0	0	0	0	0	0	0	0	0	0	3	9	4
OTU_408	TCGAATAAACTTGAACAGGCTGTTGCTGACACCCCTAGGGTGTGTACGTGCACGCTTGTCATCTTTATCATTTCTCCAACTGTGCACATATTGTAGACCTTGGAAGCTTTTTTGAATTTATTTTTCGAGTTGGGACTGCTGTGCTTTTTGATCAAAGTCAGCTTTGCCCTTTGCATTTCAAGGTCTATGTCATTTTTTCACAAACCTCTTGATGCGTTTAGAATGTGTTGAATCAGGTCAATTTTGTACCTATAAAGTTAAATATA	UDB035849|k__Fungi;p__Basidiomycota;c__Agaricomycetes;o__Agaricales;f__Inocybaceae;g__Inocybe;s__Inocybe_appendiculata|SH1632048.08FU	100	1e-135	99.62	UDB035849	Fungi	Basidiomycota	Agaricomycetes	Agaricales	Inocybaceae	Inocybe	inocybe	9	1	3	0	0	0	0	2	1	0	0	0	0	0	0
OTU_300	TTGAATGAACTTGGTGTGGTTGTTGCTGGCCCTTTTGGGGGCATGTGCACACCCACCATCCTCATCTCTCCACCTGTGCACCTCTTGTAGACCTGGGATAGATTTTCCGAGGCAACTCGGTCTGGAGGAATGCTGCCCTAAGCTTTCTTTGTATTTCCTGGTCTATGTTTTTCATATACCCGATAGCATGTAACAGAATGTATCATTTGGGCGCTTGTGCCCTATAAACCTTATA	MK027198|k__Fungi;p__Basidiomycota;c__Agaricomycetes;o__Agaricales;f__Hymenogastraceae;g__Hymenogaster;s__Hymenogaster_sp|SH1563828.08FU	100	1e-120	100	MK027198	Fungi	Basidiomycota	Agaricomycetes	Agaricales	Hymenogastraceae	Hymenogaster	hebeloma-alnicola	0	0	0	0	0	0	0	4	0	0	0	0	5	5	2
OTU_147	TTGAAATAAACTTGATGGGTTGTTGCTGGTTCTCTCGGGAGCATGTGCACACCTTGTCATCTTTATACCTCCACCTGTGCACTTTTTGTAGACCTTTTCGGGTCTATGTTGCCTCATTTTACCCCAATGTATGTCAATAGAATGTTGTGCCTATATATAATATATA	MK211177|k__Fungi;p__Basidiomycota;c__Agaricomycetes;o__Agaricales;f__Cortinariaceae;g__Cortinarius;s__Cortinarius_minusculus|SH1545401.08FU	100	1e-82	100	MK211177	Fungi	Basidiomycota	Agaricomycetes	Agaricales	Cortinariaceae	Cortinarius	cortinarius	0	0	3	1	0	0	3	5	2	2	0	0	0	0	0
OTU_477	TTGAAATAAACCTGATGGGTTGTTGCTGGTTCTCTAGGGAGCATGTGCACGCCTTGTCATCTTTATATCTCCACCTGTGCACTTATTGTAGGCCTTTTTAGGTCTATGTTGCTTCACTTACCCCAATGTATGTCAATAGAATGTTGTGCCTATATATAATATATA	HF565073|k__Fungi;p__Basidiomycota;c__Agaricomycetes;o__Agaricales;f__Cortinariaceae;g__Cortinarius;s__Cortinarius_sp|SH1172931.08FU	100	1e-73	96.99	HF565073	Fungi	Basidiomycota	Agaricomycetes	Agaricales	Cortinariaceae	Cortinarius	cortinarius	0	0	0	0	0	0	0	0	0	0	0	0	15	1	0
OTU_146	CCGAACCGTCGACACGAGTTGTTGCTGGTCCTCGAGAGGGGGCATGTGCACGCTCTGTTTACACATCCACTCACACCTGTGCACCCTCTGTAGTTCTGTGGCCTTGGGGCTCTGTCCTCTTGCCGTGGTCCTACGTCTTTACACACACGCCGTGACGAAGTCTCGTGGAATGTACGTCGCGTTTAACGCAATACAATA	HE820398|k__Fungi;p__Basidiomycota;c__Agaricomycetes;o__Thelephorales;f__Thelephoraceae;g__unidentified;s__Thelephoraceae_sp|SH1140559.08FU	100	1e-88	96.48	HE820398	Fungi	Basidiomycota	Agaricomycetes	Thelephorales	Thelephoraceae	_	tomentella-thelephora	0	0	0	0	0	0	12	0	4	0	0	0	0	0	0
OTU_168	CCGAATTGTCAACACGAGTTGTTGCTGGTCCTCAAATGGGGGCATGTGCACGCTCTGTTTGCACATCCACTCACACCTGTGCACCCTCCGTAGTTCTGCAGCCTGGGGGCTCTGTCCCCCTGCTGTGGTTCTATGTATTTACACACACACACTGTAATAAAGTCTCATGGAATGTATGCCGCGTTTAACGCAATACAATA	KY684578|k__Fungi;p__Basidiomycota;c__Agaricomycetes;o__Thelephorales;f__Thelephoraceae;g__unidentified;s__Thelephoraceae_sp|SH1502304.08FU	100	2e-101	100	KY684578	Fungi	Basidiomycota	Agaricomycetes	Thelephorales	Thelephoraceae	_	tomentella-thelephora	4	0	0	0	0	0	7	0	2	0	0	0	0	0	3
OTU_534	ATGATTGCGAATCGTTGTCTTCAGTGCTGGCCAGCTCTGGCAAGTGCACGTTGGCAGCTTTTCATCCAATACCCCTGTGAACCTTTGGCCTCTTGCTGGCTTTGGCTGGCAGAGGATTTTTACACCCACTCGAATGTAATGAAATTATTGTCGTGCGCAAGCACTAATGTA	LC013780|k__Fungi;p__Basidiomycota;c__Agaricomycetes;o__Sebacinales;f__Sebacinaceae;g__Sebacina;s__Sebacina_sp|SH1561908.08FU	100	1e-83	99.42	LC013780	Fungi	Basidiomycota	Agaricomycetes	Sebacinales	Sebacinaceae	Sebacina	sebacina	0	0	0	0	0	0	0	0	0	15	0	0	0	0	0
OTU_213	TCGTATAACCGAGGTGCAAGGGCTGTTGCTGACCTTCAAAGGTTGTGCACGCCCAAGCACTCTCACACATCCATCTCTCACCCCCTTGTGCATCGCCGCGTGGGCCCCCCCTTTGCAGGAGGGCTTGCGTTTTCACATAAAACTTGATACAGTGTAGAATGTTTTCTTTTGCGGTCACACGCAATCAATA	KJ769294|k__Fungi;p__Basidiomycota;c__Agaricomycetes;o__Russulales;f__Russulaceae;g__Russula;s__Russula_sp|SH1538848.08FU	100	8e-96	100	KJ769294	Fungi	Basidiomycota	Agaricomycetes	Russulales	Russulaceae	Russula	russula-lactarius	0	0	0	0	0	0	1	4	10	0	0	0	0	0	0
OTU_380	TCGTACAACTGAGGTGCAAGGGCTGTCGCTGACCTTCAAGGGTCGTGCACGCCCAAGCCCTCTCACACATCCATCTCACCCCTTTGTGCATCACCGCGTGGGCCCCCCTTTGCAGGAGGGCTTGCGTTTTCACATAAAACTTGATACAGTGTAGAATGTTATTTTTGCGGTCACACGCAATCAATA	MH979313|k__Fungi;p__Basidiomycota;c__Agaricomycetes;o__Russulales;f__Russulaceae;g__Russula;s__Russula_sp|SH1538850.08FU	100	1e-84	96.84	MH979313	Fungi	Basidiomycota	Agaricomycetes	Russulales	Russulaceae	Russula	russula-lactarius	0	0	0	3	3	9	0	0	0	0	0	0	0	0	0
OTU_194	TTGAATAAACTTGAACAGGCTGTTGCTGGCCCTTTTCTGGGGGGCAAGTGCACGCTTGTCATCTTTATTTCTCCAACTGTGCACATATTGTAGATCCTGGAGTTCTTGTTGATTTGTATCGAGTTGGGACTGCTGTGCTTTCAGCTTTGCCTTGAGGATCTTCCAGGTCTATGTCATTTTCACAACCTCTTGAATGTGTATAGAATGTTGAATCAGGTCCTTTTTGTACCTATAAAGTTAAATATA	MG012470|k__Fungi;p__Basidiomycota;c__Agaricomycetes;o__Agaricales;f__Inocybaceae;g__Inocybe;s__Inocybe_splendentoides|SH1557832.08FU	100	4e-125	99.59	MG012470	Fungi	Basidiomycota	Agaricomycetes	Agaricales	Inocybaceae	Inocybe	inocybe	0	0	0	0	0	0	0	12	2	0	0	0	0	0	0
OTU_160	TTGAATGAACTTGGCGTGGTTGTTGCTGGCCCTCTCGGGGGCATGTGCACACCCGCCATCTCCATCTCTCCACCTGTGCACCTCTTGTAGACTGGAATAGACTTTCCGAGGCAACTCGGTCGGGAGGAATGCTGTCGCTTTGCGTCGGCTTTCTTTGCACTTCCAAGCCTATGTTTTTCATATACCCGTAGTATGTAACAGAATGTATCATTTGGGCCTCAGTGCCTATAAACCATATA	UDB0778712|k__Fungi;p__Basidiomycota;c__Agaricomycetes;o__Agaricales;f__Hymenogastraceae;g__Hymenogaster;s__Hymenogaster_sp|SH1563791.08FU	100	6e-123	100	UDB0778712	Fungi	Basidiomycota	Agaricomycetes	Agaricales	Hymenogastraceae	Hymenogaster	hebeloma-alnicola	1	1	0	0	0	0	1	6	5	0	0	0	0	0	0
OTU_447	TTGATTGCGAATCGTTGCCTTCTGTGCTGGCCAGCTCTGGCAAGTGCACGTCGGTGACTTTCATCCAATACCCTGTGAACCTTTGGCCTCTGCTAGCTTCGGCCGGCAGGGGAATTTACACACACTCGAATGTAATGAAATTTATTGTCGTGCGCAAGCACTAATGTA	UDB034302|k__Fungi;p__Basidiomycota;c__Agaricomycetes;o__Sebacinales;f__Sebacinaceae;g__Sebacina;s__Sebacina_sp|SH1561862.08FU	100	1e-83	100	UDB034302	Fungi	Basidiomycota	Agaricomycetes	Sebacinales	Sebacinaceae	Sebacina	sebacina	0	0	0	0	0	0	1	0	0	0	0	0	4	2	6
OTU_117	TCGTACAACCGAGGTGCATGGGCTGTCGCTGACCTCCAAAGGTTGTGCACGCCCAAGCGCTCTCACACATCCATCTCACCTTTGTGCATCACCGCGTGGGTCCCCTTTGCAGGAGGGCTTGCGTTTTCACATAAAACTTGATACAGTGTAGAATGTTTTATTTGCGGTCACACGCAATCAATA	UDB0778053|k__Fungi;p__Basidiomycota;c__Agaricomycetes;o__Russulales;f__Russulaceae;g__Russula;s__Russula_vinososordida|SH1538837.08FU	100	6e-92	100	UDB0778053	Fungi	Basidiomycota	Agaricomycetes	Russulales	Russulaceae	Russula	russula-lactarius	0	0	0	3	0	10	0	0	0	0	0	0	0	0	0
OTU_276	ATGAAATGAATGGTGAGAAGGGGTTGTAGCTGGCCTTTTGGGGTATGTGCACACCTTGATCACACATCTATCTCTCACACTTGTGCACTATGTGTAGCTTGGGGATGATTACAATATTAGAAATGATGTTGAAAGCCCTGGCTATGAATTTTATTATAAACTTATACAAAGTTATAGAATGGTTAATGTTATAGCGTGTAATAGCACAAATAAATA	MK290731|k__Fungi;p__Basidiomycota;c__Agaricomycetes;o__Thelephorales;f__Thelephoraceae;g__Pseudotomentella;s__Pseudotomentella_abundiloba|SH1519376.08FU	100	3e-105	98.61	MK290731	Fungi	Basidiomycota	Agaricomycetes	Thelephorales	Thelephoraceae	Pseudotomentella	pseudotomentella	5	6	2	0	0	0	0	0	0	0	0	0	0	0	0
OTU_148	TTGAAATAAAACTGATGGGTTGTTGCTGGCTCTCCAGGGAGCATGTGCACACCTTGTCATCTTTATATCTCCACCTGTGCACTTTTTGTAGACCTTTTTAGGTCTATGTTGCTTCATTTTACCCCCAATGTATGTTAATAGAATGTTGTGCCTATGTAATATATA	MK816385|k__Fungi;p__Basidiomycota;c__Agaricomycetes;o__Agaricales;f__Cortinariaceae;g__Cortinarius;s__Cortinarius_sp|SH1545644.08FU	100	2e-80	99.39	MK816385	Fungi	Basidiomycota	Agaricomycetes	Agaricales	Cortinariaceae	Cortinarius	cortinarius	0	0	0	3	9	1	0	0	0	0	0	0	0	0	0
OTU_346	TTGAAATAAATCTGATGGGTTGTTGCTGGTTCTCTAGGGAGCATGTGCACACCTTGTCATCTTTATATCTCCACCTGTGCACTTTTTGTAGGCCTTTCAGGTCTATGTTGCTTCATTTACTCCAATGTATGTCAATAGAATGTTGTGCCTATATAATATATA	MG786237|k__Fungi;p__Basidiomycota;c__Agaricomycetes;o__Agaricales;f__Cortinariaceae;g__Cortinarius;s__Cortinarius_sp|SH1545238.08FU	100	2e-80	100	MG786237	Fungi	Basidiomycota	Agaricomycetes	Agaricales	Cortinariaceae	Cortinarius	cortinarius	0	0	0	0	0	1	0	0	0	0	0	0	7	2	3
OTU_157	TTGAAATAAACCTGATGGGTTGTTGCTGGCTCTCTAGGGAGCATGTGCACGCCTTGTCATTTTTATATCTCCACCTGTGCACCTTTTGTAGACCCAGGGATATGGTCTATGTTGCTTCTTCATTTACCCCAATGTATGTCAATAGAATGTTGTGCCCATGATTAAAATCTATA	LC175502|k__Fungi;p__Basidiomycota;c__Agaricomycetes;o__Agaricales;f__Cortinariaceae;g__unidentified;s__Cortinariaceae_sp|SH1545229.08FU	94	2e-57	92.02	LC175502	Fungi	Basidiomycota	Agaricomycetes	Agaricales	Cortinariaceae	_	cortinarius	0	0	0	3	6	4	0	0	0	0	0	0	0	0	0
OTU_1054	TTGAACTGTCAACATGAGCTGTTGCTGGTCCTCAAACCGGGGGCATGTGCACGCTCTGTTTACACATCCACTCACATCTGTGCACTCTCTGTAGTTCTATGGTCCAGGGGAGAGACTCTGTCCTCCTCTCATAGTTCTACATTACCACACACACACTGTAATAAAGTCTTATGGAATGTATTCCGCGTTTAACGCAATGCAATA	UDB039501|k__Fungi;p__Basidiomycota;c__Agaricomycetes;o__Thelephorales;f__Thelephoraceae;g__Tomentella;s__Tomentella_sp|SH1502433.08FU	100	7e-97	98.04	UDB039501	Fungi	Basidiomycota	Agaricomycetes	Thelephorales	Thelephoraceae	Tomentella	tomentella-thelephora	0	0	0	0	0	0	0	0	0	0	12	0	0	0	0
OTU_214	AAAGTGATTGGTTATACATTTCATGTATCAACTGCATAAACCCATTCCGAGTATCTTGCCTGTTGCTTCCATGGGGCCTGACCTCGGTCACTCTTGTGATGTGAAATCCAAGAGAGTCCCCATGGGAGGTAATCATTAAATTCATGTATCCAATGTCTTCTGTCTGAACTGTTTATGACAAATGTTA	HQ336664|k__Fungi;p__Ascomycota;c__Pezizomycetes;o__Pezizales;f__Pyronemataceae;g__Trichophaea;s__Trichophaea_sp|SH1557658.08FU	100	4e-94	100	HQ336664	Fungi	Ascomycota	Pezizomycetes	Pezizales	Pyronemataceae	Trichophaea	wilcoxina	0	0	0	3	8	1	0	0	0	0	0	0	0	0	0
OTU_239	TTGAAATAAACCTGATGGGTTGTTGCTGGTTCTCTAGGGAGCATGTGCACGCCTTGTCATCTTTATATCTCCACCTGTGCACCTTTTGTAGACCTTCCAGGTCTATGTTGCTTCATTTACCCCAATGTATGTTAATAGAATGTTGTGCCTACAAAATACATA	MK234571|k__Fungi;p__Basidiomycota;c__Agaricomycetes;o__Agaricales;f__Cortinariaceae;g__Cortinarius;s__Cortinarius_bivelus|SH1545243.08FU	100	2e-80	100	MK234571	Fungi	Basidiomycota	Agaricomycetes	Agaricales	Cortinariaceae	Cortinarius	cortinarius	5	0	4	2	0	1	0	0	0	0	0	0	0	0	0
OTU_289	CTGAATTGTCGACACGAGTTGTTGCTGGTCCTCGAACGGGGGCATGTGCACGCTCTGTTTACACATCCACTCACACCTGTGCACCCTCTGTAGTTCTATGGCCTGAGGGACGATGTCCACTTGCCATGGTTCTATATCTTTACACACACACACCACGATAAAGTCTTATGGAATGTATGCCGCGTTTAACGCAATACAATA	FJ553218|k__Fungi;p__Basidiomycota;c__Agaricomycetes;o__Thelephorales;f__Thelephoraceae;g__unidentified;s__Thelephoraceae_sp|SH1528416.08FU	100	7e-102	100	FJ553218	Fungi	Basidiomycota	Agaricomycetes	Thelephorales	Thelephoraceae	_	tomentella-thelephora	0	0	0	0	0	0	5	4	3	0	0	0	0	0	0
OTU_510	CTGAACCGTCGACACGAGTTGTTGCTGGTCCTCGAAAGAGGGCACGTGCACACTCTGTTTACACATCCACTCACACCTGTGCACCCTCTGTAGTTCTATGGCCTTGGGGGCTCTGCCCTCTGGCCGTGGTCCTACATCTTTACACACACACCATAATAAAGTCTCATGGAATGTACTTCGCGTTTAACGCAATACAATA	KY574419|k__Fungi;p__Basidiomycota;c__Agaricomycetes;o__Thelephorales;f__Thelephoraceae;g__unidentified;s__Thelephoraceae_sp|SH1502518.08FU	100	2e-92	97.49	KY574419	Fungi	Basidiomycota	Agaricomycetes	Thelephorales	Thelephoraceae	_	tomentella-thelephora	0	0	0	0	0	0	0	0	0	7	0	5	0	0	0
OTU_143	TAGTACAACGGAGGCGCCTGGGCTGTTGCTGACCTCAAGGTCGTGCACGCCCGGAGTGCTCTCTCACATCCATCTCACCCCTTTGTGCATCATCGCGTGGGGCCCTCTCCTTTGGCTTGTTCCGGAAGGGGGGGGGTTCACGTTTTTACACGAACAACCCATTAATGCATGTGTAGAATGTCTTACTTTTTGCGGTCACACGCAATCAATA	UDB037663|k__Fungi;p__Basidiomycota;c__Agaricomycetes;o__Russulales;f__Russulaceae;g__Russula;s__Russula_aeruginea|SH1567121.08FU	100	2e-107	100	UDB037663	Fungi	Basidiomycota	Agaricomycetes	Russulales	Russulaceae	Russula	russula-lactarius	0	0	0	0	0	0	3	7	1	0	0	0	0	0	0
OTU_1010	TTGAATAAATTTGAACGGGCTGTTGCTGGCTCTGTTGAGCGATGTGCACGCTTGTCATGTTTATGTTTCCAACTGTGCACACATTGTAGATCTGGTGGAATTTTATGTTGCTTGCAATAATAGAGTGAGGATTTTGCTGTATGGCACTCCTTGTCTGCTAGGTCTATGTTCACAAACTCTGAAATGGTTATAGAATGATGGGGAAAAAAAAATTTA	JF748082|k__Fungi;p__Basidiomycota;c__Agaricomycetes;o__Agaricales;f__Inocybaceae;g__Inocybe;s__Inocybe_sp|SH1623066.08FU	99	1e-104	98.6	JF748082	Fungi	Basidiomycota	Agaricomycetes	Agaricales	Inocybaceae	Inocybe	inocybe	0	0	0	0	0	0	0	0	0	2	6	3	0	0	0
OTU_232	TCGAATAAACTTGAACAGGCTGTTGCTGGCCCTCCTCGGAGGGATATGTGCACGCTTGTCATCTTTATTTCTCCAACTGTGCACATATTGTAGACCTGAGAGAGATGTTTGATTTATTTTCGAGTTGGGGACTGCCGTGCTTTTTGTCAAGTCGGCTTTCCCTTGTATTTTTCAGGTCTATGTCATTTTCACAAAACCTCTGAATCTGTTTAGAATGTTGAATCAGGTCATTTTGTACCTATAAAGTTAAATATA	FR852254|k__Fungi;p__Basidiomycota;c__Agaricomycetes;o__Agaricales;f__Inocybaceae;g__Inocybe;s__Inocybe_sp|SH1527521.08FU	100	4e-130	99.61	FR852254	Fungi	Basidiomycota	Agaricomycetes	Agaricales	Inocybaceae	Inocybe	inocybe	5	5	0	0	0	0	0	0	1	0	0	0	0	0	0
OTU_542	CTGAACTGTCAACACGAGTTGTTGCTGGTCCTCAAATGGGGGCATGTGCACGCTCTGTTTACATACCCACTCACACCTGTGCACCCTCTGTAGTTCTGTGGTGTGGGGGACTCTGTCCTCCCACTGTGGTTCTACGTCTTTACACACACACAGTCTCATAGAATGTATGTCGCGTTTAACGCAATACAATA	KX510028|k__Fungi;p__Basidiomycota;c__Agaricomycetes;o__Thelephorales;f__Thelephoraceae;g__unidentified;s__Thelephoraceae_sp|SH1502201.08FU	100	2e-96	100	KX510028	Fungi	Basidiomycota	Agaricomycetes	Thelephorales	Thelephoraceae	_	tomentella-thelephora	0	0	0	0	0	0	0	0	0	0	0	11	0	0	0
OTU_227	CTGAAAAACTTTTGAAAAATAGTTTTTTTATATCCCATTGTCTACCTACCATGTTGCTTCCACTGGACATGTTTTACTTTATGTGTGAGACCTTTGGCTTGTGTGAATAACCCAAGTCAGGGAGTTGCCGGTGGCAAGACCATTTACCAAAACTTGATTAAACACACAATTGTCTGAATCTTTTGCTTCAATATAATA	KX095154|k__Fungi;p__Ascomycota;c__Pezizomycetes;o__Pezizales;f__Pezizaceae;g__Peziza;s__Peziza_sp|SH1510519.08FU	100	3e-100	100	KX095154	Fungi	Ascomycota	Pezizomycetes	Pezizales	Pezizaceae	Peziza	terfezia-peziza	0	0	0	0	0	0	1	6	3	0	0	0	0	0	0
OTU_195	TTGAAATAAACCTGATGGGTTGTTGCTGGTTCTCTAGGGAGCATTGTGCACACCTTGTCATCTTTATATCTCCACCTGTGCACTCTTTGTAGACCTTTCAGGTCTATGTTGCTTCATTTACCCCAATGTATGTTAATAGAATGTTGTGCATTATAAAATCTATA	UDB036381|k__Fungi;p__Basidiomycota;c__Agaricomycetes;o__Agaricales;f__Cortinariaceae;g__Cortinarius;s__Cortinarius_triformis|SH1545353.08FU	100	2e-81	100	UDB036381	Fungi	Basidiomycota	Agaricomycetes	Agaricales	Cortinariaceae	Cortinarius	cortinarius	0	0	0	6	3	1	0	0	0	0	0	0	0	0	0
OTU_212	TTGAATAAACCTGATGGGTTGTTGCTGGCTCTCTTGGGAGCATGTGCACACCTTGTCATCTTTATATTTCCACCTGTGCACCTTTTGTAGACCTCCCCAGGTCTATGTTGCTTCATTTACCCCCAATGTATGTTAATAGAATGTTGTGTCTATAAAATCTATA	MK234568|k__Fungi;p__Basidiomycota;c__Agaricomycetes;o__Agaricales;f__Cortinariaceae;g__Cortinarius;s__Cortinarius_armillatus|SH1556103.08FU	100	7e-81	100	MK234568	Fungi	Basidiomycota	Agaricomycetes	Agaricales	Cortinariaceae	Cortinarius	cortinarius	0	0	0	3	4	3	0	0	0	0	0	0	0	0	0
OTU_301	TTGAAATAAACTTGATAAGTTGTTGCTGGTTCTCTAGGGAGCATGTGCACACTTGTCATCTTTGTATCTCCTCCTGTGCACCTTTTGTAGACCTTGGGTATCTATCTGATTGCTTTAGCAACTCAGGATTGAGGATTGACTTTCTGTCTCTTCTTACATTTCCAGGCCTATGTTTTTCAAATACCCTAATGTATGTTTATAGAATGTAATCAAATAGGCCTTTGTGCCTATAAATTGATA	UDB037440|k__Fungi;p__Basidiomycota;c__Agaricomycetes;o__Agaricales;f__Cortinariaceae;g__Cortinarius;s__Cortinarius_elegantior|SH1503727.08FU	100	4e-120	99.17	UDB037440	Fungi	Basidiomycota	Agaricomycetes	Agaricales	Cortinariaceae	Cortinarius	cortinarius	4	2	4	0	0	0	0	0	0	0	0	0	0	0	0
OTU_411	ATGAGTTGTGATGGGGTTTGATGCTGGCAGCCAATTTTTGGATGCATGTGCTTGCCCTAACAATCATCTTCCAAACACCTGTGCACATTTTTGAGGGAGTTTCGAGTTGATTGCCACTTTTGGGTGATTTTCTTGCATTCCCTTAAATCATTATACGCCATTGACAATGCTGAACGTGCTCTGTGCCGCAAGGCCATTAATATAATA	MH040298|k__Fungi;p__Basidiomycota;c__Agaricomycetes;o__Cantharellales;f__Clavulinaceae;g__Clavulina;s__Clavulina_sp|SH1546080.08FU	100	3e-105	100	MH040298	Fungi	Basidiomycota	Agaricomycetes	Cantharellales	Clavulinaceae	Clavulina	clavulina	0	0	0	0	0	0	0	0	0	0	0	0	2	3	5
OTU_723	TTGAATGAATGTAGAGTTGGTTGTCGCTGGCCCTCTTGGGCATGTGCACGCCTTCTCTTTCATCCACACACACCTGTGCACTTGTGAGACGGAGGGCTTTAATTAGTCTTCCGTCTACTTAATCACACAAACTCATTTAATTAAATTGAATGTAATTGATGTAACGCATCATTAGAAC	AB286933|k__Fungi;p__Basidiomycota;c__Agaricomycetes;o__Cantharellales;f__Ceratobasidiaceae;g__Ceratobasidium;s__Ceratobasidium_sp|SH1510176.08FU	100	3e-89	100	AB286933	Fungi	Basidiomycota	Agaricomycetes	Cantharellales	Ceratobasidiaceae	Ceratobasidium	ceratobasidium2	0	0	0	0	0	0	0	0	0	0	0	8	2	0	0
OTU_582	TTGAGCTGTCGACATGAGCTGTTGCTGGTCCTCAAACCAGGGGGCATGTGCACGCTCTGTTCACACATCCACTCACACCTGTGCACCCTCTGTAGTTCTATGGTCTGGAGGATGCACCGTCTTCCTTCTGTAGTTCTACGTCTTTACACATACGCCCTAGTGAAGTTTTATGGAATGTGTGCCGCGTCTAACGCAATACAATA	KF000672|k__Fungi;p__Basidiomycota;c__Agaricomycetes;o__Thelephorales;f__Thelephoraceae;g__unidentified;s__Thelephoraceae_sp|SH1502585.08FU	99	2e-97	98.51	KF000672	Fungi	Basidiomycota	Agaricomycetes	Thelephorales	Thelephoraceae	_	tomentella-thelephora	0	0	0	0	0	0	0	0	0	0	0	0	2	3	5
OTU_262	ATGATTACGAATGGTTGCCTTCTGTGCTGGCCAGAACTGGCAAGTGCACGTCGGTGGCTTTCATCCAATACCCTGTGAACCTTTGGCCTTTGCTAGCTTCGGCCGGCAGAGGAATTTACACACACTCGAATGTAATGAAATATATTGTCGTGCGCAAGCACTAATGTA	KU176296|k__Fungi;p__Basidiomycota;c__Agaricomycetes;o__Sebacinales;f__Sebacinaceae;g__Sebacina;s__Sebacina_sp|SH1561877.08FU	100	5e-82	99.41	KU176296	Fungi	Basidiomycota	Agaricomycetes	Sebacinales	Sebacinaceae	Sebacina	sebacina	0	0	0	1	4	4	0	0	0	0	0	0	0	0	0
OTU_299	CTGAAGTATCAATGACAAGTTGTTGCTGATTTCGTGCACGCTTGTTGTTCTTCATTTCTCCATTATATGTGCACCACTTGTGTGGATCATTAGGACTGCTTTGCAAAGTTACTATTTGTGGGGCTTTCCTTGGATCTACATGTTTTTTCACATACACCAATGTTTAGAAGGAAAAAAAAGTTGAATTATTATA	FN550945|k__Fungi;p__Basidiomycota;c__Agaricomycetes;o__Agaricales;f__Inocybaceae;g__Inocybe;s__Inocybe_geraniodora|SH1237426.08FU	100	8e-91	97.94	FN550945	Fungi	Basidiomycota	Agaricomycetes	Agaricales	Inocybaceae	Inocybe	inocybe	0	3	0	0	0	0	0	0	0	5	0	1	0	0	0
OTU_706	TCGAATAAACATTTGATAGGCTGTTGCTGGCCCTTCTAGGGTAGTGTGCACGCTTGTCATTTATTTTTCCACCTGTGCACCACCTAGTCTCTCTAGGTTCTATGTTACTCACATACTCCTACGAATGTAATAGAATGTTGATCTGGGTCTTTGATGCCCATAAAGTTATATA	UDB025590|k__Fungi;p__Basidiomycota;c__Agaricomycetes;o__Agaricales;f__Inocybaceae;g__Inocybe;s__Inocybe_sp|SH1563645.08FU	100	3e-69	93.48	UDB025590	Fungi	Basidiomycota	Agaricomycetes	Agaricales	Inocybaceae	Inocybe	inocybe	0	0	0	0	0	0	0	0	0	0	0	9	0	0	0
OTU_193	TTGAATTTTGAGAGAGGTTGTAGCTGATCATTAAGATATGTGCACACCTCATTTCCAAATTTTACACCATGTGCACTTTTTGTAGGCTGACTTCTGTTGGTCTATGTCTTTTTAAACACACTCAAAAGTTTAGAATGTTAAAACACAAGCTTTGCATTTTTGCAAGCTTTTAAAATTAATA	GU083048|k__Fungi;p__Basidiomycota;c__Agaricomycetes;o__Agaricales;f__Hygrophoraceae;g__Hygrophorus;s__Hygrophorus_sp|SH1577725.08FU	100	2e-87	98.9	GU083048	Fungi	Basidiomycota	Agaricomycetes	Agaricales	Hygrophoraceae	Hygrophorus	hygrophorus	0	0	0	2	4	3	0	0	0	0	0	0	0	0	0
OTU_548	ATGAATTTTTACAGAGGGTTGATGCTGGCAGTTTATCTGCATGTGCTCACTCTTCTGATTTATTTACACCTGTGCACTTAATTTTTTTTCAAAGGCTTTAGGGGTAAAACCTGCCTTTGGGACTTACAAACCCCCCTATATTGAGACAATGAATGTTTATCTGCCGTAAGGCAAATTTTTAATA	KU612546|k__Fungi;p__Basidiomycota;c__Agaricomycetes;o__Cantharellales;f__Hydnaceae;g__Hydnum;s__Hydnum_sp|SH1168893.08FU	100	2e-92	100	KU612546	Fungi	Basidiomycota	Agaricomycetes	Cantharellales	Hydnaceae	Hydnum	cantharellus	0	0	0	0	0	0	0	0	0	0	0	0	7	0	2
OTU_1657	ATGATTGCGAATGGTTGCCTTCAGTGCTGGCCGGCTTCGGCTTTGGCAAGTGCACGTCGGCGACTTTCATCCAATACCCTGTGAACCTTTGGCCTCTGCTAGCTTCGGCCGGCAGAGGATTTTACACAAACTCGAATGTAATGAAATTTACTGTCGTGCGCAAGCACTAATGTA	KC840634|k__Fungi;p__Basidiomycota;c__Agaricomycetes;o__Sebacinales;f__Sebacinaceae;g__Sebacina;s__Sebacina_sp|SH1521275.08FU	100	3e-85	99.43	KC840634	Fungi	Basidiomycota	Agaricomycetes	Sebacinales	Sebacinaceae	Sebacina	sebacina	0	0	0	0	0	0	7	0	1	0	0	0	0	0	0
OTU_351	TCGTAAAACCGAGGTGCGAGGGCTGTCGCTGACCTTTTCGGTCGTGCACGCCCGAGCGCTCTCACACAATCCATCTCACCCCTTGTGCACCACCGCGTGGGTCCCTTTCTGGCTTGTCCGGAGGGGGGCTCGCGTTTTCACACAAACTTGAAGTAGTGTAGAATGTCCTTTTTTTGCGATAACATGCAATCAATA	KX095031|k__Fungi;p__Basidiomycota;c__Agaricomycetes;o__Russulales;f__Russulaceae;g__Russula;s__Russula_bicolor|SH1509012.08FU	100	1e-98	100	KX095031	Fungi	Basidiomycota	Agaricomycetes	Russulales	Russulaceae	Russula	russula-lactarius	0	0	0	1	2	5	0	0	0	0	0	0	0	0	0
OTU_410	AAAGTAATATATATTCATTGCAATATACATTTCAAACCCCTTGTCTAAACTACCTGTTGCTTCCGGCTGTGTGGGCTGTATGGTTAGCTGTATAGCCTGGCCGGAAGGTTGACATAAAATATTGTATTTAGAGTCTTCTGAATTGTTAAAACAAAAGTTA	MF352744|k__Fungi;p__Ascomycota;c__Pezizomycetes;o__Pezizales;f__Pyronemataceae;g__Pustularia;s__Pustularia_sp|SH1547530.08FU	100	7e-76	98.75	MF352744	Fungi	Ascomycota	Pezizomycetes	Pezizales	Pyronemataceae	Pustularia	pustularia	0	0	0	0	0	0	0	0	0	0	0	0	2	5	1
OTU_426	TCGAAATTATAGGTGAGGGTTGTAGCTGGCCTCTCGGGGCATGTGCACACCTGAGCCCTTAATCCCACACACACCTGTGAACCTATTGTAAGGGCCCGTAAAAAAGGCCTTTATGTCTTTATCACCTACACGAAAGTCTCAATAGAATGTAAATGTAATGTCCTCGCCTTGAAAAAGCGTTGATAAAAAAAAGTTATA	KM576315|k__Fungi;p__Basidiomycota;c__Agaricomycetes;o__Atheliales;f__Atheliaceae;g__Piloderma;s__Piloderma_sp|SH1544819.08FU	100	3e-100	100	KM576315	Fungi	Basidiomycota	Agaricomycetes	Atheliales	Atheliaceae	Piloderma	piloderma	0	0	0	5	3	0	0	0	0	0	0	0	0	0	0
OTU_398	TCATGTCATTCAGTCATGCTGCCGCGTGAACTGTACAAATCCACTCTGCGTACCTACCCTGTTGCTTCCGCTGGGCCCGGAGCATTTCGGAGGAGTTGCCTCTCGCATGGTTAAAATCTGTGTGGAGTTGGCTGTTCTCTGGGGCTGCTCTGGATTCACATGCCTGGTGGGAGGATACTTAATCTCTGGGTTTTTATATTCCATCTGTCTGATCTGTGAACCAAACAATTGTTA	FR852074|k__Fungi;p__Ascomycota;c__Pezizomycetes;o__Pezizales;f__Pyronemataceae;g__Humaria;s__Humaria_sp|SH1608587.08FU	100	4e-85	91.1	FR852074	Fungi	Ascomycota	Pezizomycetes	Pezizales	Pyronemataceae	Humaria	genea-humaria	4	2	2	0	0	0	0	0	0	0	0	0	0	0	0
OTU_1291	TTGAAATAAACCTGATGGGTTGTTGCTGGCTCTCTAGGGAGCATGTGCACGCCTTGTCATCTTTATATCTCCACCTGTGCACTTTTTGTAGACCTTTTCAGGTCTATGTTGCTTCATTTTACCCCAATGTATTTCTATAGAATGTTGTGCCTATGATAATATATA	LC175068|k__Fungi;p__Basidiomycota;c__Agaricomycetes;o__Agaricales;f__Cortinariaceae;g__unidentified;s__Cortinariaceae_sp|SH1545229.08FU	95	7e-76	99.36	LC175068	Fungi	Basidiomycota	Agaricomycetes	Agaricales	Cortinariaceae	_	cortinarius	0	0	0	2	3	3	0	0	0	0	0	0	0	0	0
OTU_268	CTGAATTGTAATGGGGGTTGATGCTGGCACGCTGCCTTTTGGCTTGCATGTGCTCGCCCCCAACAATCCTTTATCCCAAACACCTGTGCACCTTTTGGAAAGGGGGTTTTAAGCAAGGCTTACTGCTAGAATTCTCCCTTTTCTTCACATATAAACTCTTTTCAATCTTGAATGTGATTCTGCCGTTAAGGCACTAATATAATA	HF675393|k__Fungi;p__Basidiomycota;c__Agaricomycetes;o__Cantharellales;f__Clavulinaceae;g__clavulina;s__Clavulinaceae_sp|SH1510870.08FU	100	2e-101	99.51	HF675393	Fungi	Basidiomycota	Agaricomycetes	Cantharellales	Clavulinaceae		clavulina	0	0	0	2	4	2	0	0	0	0	0	0	0	0	0
OTU_224	CCGAATTGTCAACACGAGTTGTTGCTGGTCCTCAAAACGGGGGCATGTGCACGCTCTGTTTGCACATCCACTCACACCTGTGCACCCTCTGTAGTTCTGTGGCATGGGGGACTCTGTCCTCCTGTTGTGGTCCTACGTCTTTACACACACTCTGTAATAAAGTCTCATGGAATGCATGACGCGTTTAACGCAATACAATA	KM403048|k__Fungi;p__Basidiomycota;c__Agaricomycetes;o__Thelephorales;f__Thelephoraceae;g__unidentified;s__Thelephoraceae_sp|SH1502197.08FU	100	1e-99	99.5	KM403048	Fungi	Basidiomycota	Agaricomycetes	Thelephorales	Thelephoraceae	_	tomentella-thelephora	0	0	0	0	2	6	0	0	0	0	0	0	0	0	0
OTU_665	CTGAATTGTCAACAAGAGTTGTTGCTGGTCCTCAAATGAGGGCACGTGCACGCTCTGTTCACACATCCACTCACACCCTGTGCACCCTCTGTAGTTCTATGGTTGGGGGGCCTGTCCTCTTGCTATGGTTCTGCATCTTTACACACACACACCGTAACAAAGTCTCATGGAGTGCATGCCGCGTTTAACGCAATACAATA	FJ378798|k__Fungi;p__Basidiomycota;c__Agaricomycetes;o__Thelephorales;f__Thelephoraceae;g__unidentified;s__Thelephoraceae_sp|SH1141033.08FU	100	5e-88	96.02	FJ378798	Fungi	Basidiomycota	Agaricomycetes	Thelephorales	Thelephoraceae	_	tomentella-thelephora	0	0	0	0	0	0	0	0	0	0	0	0	5	3	0
OTU_901	CTGAATTGTCAACACGAGTTGTTGCTGGTCCTCAATGGGGGCATGTGCACACTCTGTTTACACATCCACTCACACCTGTGCACCCTCTGTAGTTCTGTGGCTTGGGGGCTCTGTCCTCCTGCTGTGGTTCTATATCTTTACACACACTCTGTAATAAAGTCTCATGGAATGTACACCGCGTTTAACGCAATACAATA	LC013856|k__Fungi;p__Basidiomycota;c__Agaricomycetes;o__Thelephorales;f__Thelephoraceae;g__unidentified;s__Thelephoraceae_sp|SH1502258.08FU	100	2e-96	98.98	LC013856	Fungi	Basidiomycota	Agaricomycetes	Thelephorales	Thelephoraceae	_	tomentella-thelephora	0	0	0	0	0	0	0	0	0	0	0	8	0	0	0
OTU_984	CTGAATTGTCAACACGAGTTGCTGCTGGTCCTCGAATGGGGGCATGTGCACGCTCTGTTCACACATCCACTCACACCTGTGCACCCTCTGTAGTTCTATGGTTTGGGGGATTCTTTCCCCATTCTGTGGTTCTATATCTTTACACACACTCTGTAATGAAGTCTCATGGAATGTATGCCGCGTTTAACGCAATACAATA	KC965239|k__Fungi;p__Basidiomycota;c__Agaricomycetes;o__Thelephorales;f__Thelephoraceae;g__unidentified;s__Thelephoraceae_sp|SH1502203.08FU	100	4e-99	99.5	KC965239	Fungi	Basidiomycota	Agaricomycetes	Thelephorales	Thelephoraceae	_	tomentella-thelephora	0	0	0	0	0	0	0	0	0	0	0	8	0	0	0
OTU_465	TTGACTGTGAATTTGTTACCTTCTGTGCTGGCTCCGGCAAGTGCACGTTGGTGACTTTCATTCCCAACACCCTTGTGAACCTTTGGCCTCTTGCTAGCCCCGGCTGGCAGAGGATTTTTTACACACTCGAATGTAATGAAAAACCTCTTGTTGTGCGCAAGCACTAATGTA	LC013786|k__Fungi;p__Basidiomycota;c__Agaricomycetes;o__Sebacinales;f__Sebacinaceae;g__Sebacina;s__Sebacina_sp|SH1561897.08FU	100	3e-85	100	LC013786	Fungi	Basidiomycota	Agaricomycetes	Sebacinales	Sebacinaceae	Sebacina	sebacina	0	1	0	0	0	0	0	0	1	0	0	5	0	0	0
OTU_1395	TCGTATAAAATGGAGGTGCTGGGGGCTGTCGCTGACCTTTGACAAAGGTCGTGCACGCCCGGAGCACTCTCTCATATCCATCTCACCCCTTTGTGCATTGCCGCGTGGGTCCCCTTTTGGCTTGTTCCGAGGGGGACCTGCGTTTTTACATAGACACCCTTTGAATGCATGTGTAGAATGTCTTACTTTTTGCGATCACACGCAATCAATA	AB597649|k__Fungi;p__Basidiomycota;c__Agaricomycetes;o__Russulales;f__Russulaceae;g__Russula;s__Russula_sp|SH1633421.08FU	100	2e-107	100	AB597649	Fungi	Basidiomycota	Agaricomycetes	Russulales	Russulaceae	Russula	russula-lactarius	0	0	0	0	0	0	0	0	0	0	7	0	0	0	0
OTU_337	TCGTACAACTGAGGTGCAAGGGCTGTCGCTGACCGTCAAAGGTCGTGCACGCCCGAGCGCTCTCACACAATCCATCTCACCTTTGTGCATCACCGCGTGGGTCCCCTTTGCGGGAGGGCTTGCGTTTTCACATAAAAACTCGATACAGTGTAGAATGTTTCTTTTGCGGTCACACGCAATCAATA	KC455323|k__Fungi;p__Basidiomycota;c__Agaricomycetes;o__Russulales;f__Russulaceae;g__Russula;s__Russula_sp|SH1538840.08FU	100	5e-93	100	KC455323	Fungi	Basidiomycota	Agaricomycetes	Russulales	Russulaceae	Russula	russula-lactarius	0	0	0	0	1	6	0	0	0	0	0	0	0	0	0
OTU_1305	TCGAACTAGAGTCCAGAGGGGAAAAGGAGAGCGGGCGAAGTTTGTAGAATGTTAGAGATTGTCGCTGGCCTTTGGAAACGAAGGCATGTGCACGTCTCGAGATCTACTTAGTCCTCGATCTCTTTTCCTTTCGGGAAGCTTTTTCCTACACCTGTGCACCCGTTGTAGGTCCCGCGAGGGATCTATGTTTTTCATCCACACCAATCGTATGGCCAGAATGTTTTTTAATGCGTCGATCGGCATGGCCTCGGTCATGTTGGCGACGGTAAAGAAATCAAATA	DQ273366|k__Fungi;p__Basidiomycota;c__Agaricomycetes;o__Boletales;f__Melanogastraceae;g__Melanogaster;s__Melanogaster_sp|SH1540281.08FU	95	4e-56	82.22	DQ273366	Fungi	Basidiomycota	Agaricomycetes	Boletales	Melanogastraceae	Melanogaster	paxillus-gyrodon	0	0	0	0	0	0	0	0	0	4	0	3	0	0	0
OTU_283	TTGAATAAACTTGAACAGGCTGTTGCTGTCCCTCTCGTTGGGTATGTGCACGCTTGTCATCTTTATTTCTCCAACTGTGCACATATTGTAGACCTGAGGAATGATGAATGATTTTCGAGTTGGGACTGCTGCGCTTTCAAAAGGGAGTCAGCTTTACCTTGCATTTTCAGGTCTATGTCTTTCACAAACCTATGAATTTTGTTTAGAATGTTTGGATAAAGTTATTTTATA	AY702780|k__Fungi;p__Basidiomycota;c__Agaricomycetes;o__Agaricales;f__Inocybaceae;g__Inocybe;s__Inocybe_sp|SH1527519.08FU	92	2e-62	87.33	AY702780	Fungi	Basidiomycota	Agaricomycetes	Agaricales	Inocybaceae	Inocybe	inocybe	3	3	1	0	0	0	0	0	0	0	0	0	0	0	0
OTU_296	TTGAAATAAACTTGAACAGGCTGTTGCTGGTCCCTTGGGATATGTGCACGCTTGTCTCATCTTTGTCATTTCCCCCCCAACTTGTGCACATTTTGTAGACCCTGGAGCTTTTTGAGAAATTCAGTGTTGGGACTGCTGTGCTTTCTTGTAAAGTCGGCTTTGCCTTGCCTCAGGTCTATGTCATTTTTATTCACAACCTTGTTCAGAATGTATCTTGAAAATGAAACATATA	KF617610|k__Fungi;p__Basidiomycota;c__Agaricomycetes;o__Agaricales;f__Inocybaceae;g__Inocybe;s__Inocybe_sp|SH1547243.08FU	100	2e-117	99.57	KF617610	Fungi	Basidiomycota	Agaricomycetes	Agaricales	Inocybaceae	Inocybe	inocybe	0	0	0	2	3	2	0	0	0	0	0	0	0	0	0
OTU_637	TTGAAATAAACCTGATGGGTTGTTGCTGGTTCTCTAGGGAGCATGTGCACGCCTTGTCATCTTTATATCTCCACCTGTGCACTCTTTGTAGACCTTTCTAGGTCTATGTTGCTTCATTTACTCCAATGTATGTCAATAGAATGTTGTGCCTATATAATATATA	JQ666324|k__Fungi;p__Basidiomycota;c__Agaricomycetes;o__Agaricales;f__Cortinariaceae;g__Cortinarius;s__Cortinarius_sp|SH1545293.08FU	100	1e-78	99.39	JQ666324	Fungi	Basidiomycota	Agaricomycetes	Agaricales	Cortinariaceae	Cortinarius	cortinarius	0	0	0	0	0	0	1	2	0	0	0	0	2	0	2
OTU_399	ACGAATTGTACTGGAGGGTTGATGCTGGAAGCCATTTCATGTGCTCGCCCCCTAACAATCTTCATCCAAACGCCACCTGTGCACATTTCTGGAGGGGGGGGGGTTTCTCTAAGTTTGATTGCCTTGTTGGTGATTTTTCTTCGGGGTTTCCTTCCTATCTCCCCTCATACACACACACAGCCTTTACAACATTGAACGTGATTGTGCCGCAAGGCCTTTGTTGCAATA	KX444414|k__Fungi;p__Basidiomycota;c__Agaricomycetes;o__Cantharellales;f__Clavulinaceae;g__unidentified;s__Clavulinaceae_sp|SH1561354.08FU	100	6e-108	97.41	KY684385	Fungi	Basidiomycota	Agaricomycetes	Cantharellales	Clavulinaceae	_	clavulina	3	4	0	0	0	0	0	0	0	0	0	0	0	0	0
OTU_328	GTGATTATGAACTGTTGCCTTCTGTGCTGGCTGCGGCAAGTGCACGGAGGTGACTTTCATCCAACACCCTTGTGAACCTTTGGCCTCTTGCTGGCTTCGGCTAGCTGAGGATTTACACAAACTCGCATGTATTGAGGACCCATTATGTGCGCAAGCACTAATATA	KU924630|k__Fungi;p__Basidiomycota;c__Agaricomycetes;o__Sebacinales;f__Sebacinaceae;g__Sebacina;s__Sebacina_sp|SH1561868.08FU	100	5e-82	100	KU924630	Fungi	Basidiomycota	Agaricomycetes	Sebacinales	Sebacinaceae	Sebacina	sebacina	4	1	1	0	0	0	0	0	0	0	0	0	0	0	0
OTU_416	ATGATTGCGAATGGTTACCTTTGGTGCTGGCTCTTGCGAGCAAGTGCACGTTGGTGGCTTTCATCCACTACTACCCTTGTGAACCTTTGGCCTCTTGCTAGCTTTGGCTGGCAGAGGATTTTTACACACACACTCGAATGTAATGAAAACGTTTGTCGTGCGCAAGCACTAATGTA	JN198005|k__Fungi;p__Basidiomycota;c__Agaricomycetes;o__Sebacinales;f__Sebacinaceae;g__Sebacina;s__Sebacina_sp|SH1561895.08FU	100	4e-88	100	JN198005	Fungi	Basidiomycota	Agaricomycetes	Sebacinales	Sebacinaceae	Sebacina	sebacina	0	0	0	1	0	5	0	0	0	0	0	0	0	0	0
OTU_327	TCGTACAACTGAGGCACAAGGGCTGTCGCTGACTTTGTGTCGTGCACGCCCGAGTGCTCTCAAACATCCATCTCACCCCTATGTGCACCACCGCGTGGGTCTCCCTTTGGCTCGTTCAGAGGGGGGCTCGCGTTTTCACACAAACTTGATACAGTGTAGAATGTCTTCCTTTGCGATCACACGCAATTAATA	EU711972|k__Fungi;p__Basidiomycota;c__Agaricomycetes;o__Russulales;f__Russulaceae;g__Russula;s__Russula_sp|SH1509172.08FU	100	6e-97	100	EU711972	Fungi	Basidiomycota	Agaricomycetes	Russulales	Russulaceae	Russula	russula-lactarius	0	0	0	3	1	2	0	0	0	0	0	0	0	0	0
OTU_190	TAGAAATAAATCTGAACAGGTTGTTGCTGGTCGGAAGACATGTGCACGCTTGTCTTCTTTATTTTTCCAACTGTGCACATATTGTAGACCTGTGATGTTGTTTTCTTGTCGAGAGGGAATGGCCAGGTCTATGTTACATTTTAACAACGCGTTTTAGAATGTCGGGTACTGGGGATATAACAAATATA	UDB034286|k__Fungi;p__Basidiomycota;c__Agaricomycetes;o__Agaricales;f__Inocybaceae;g__Inocybe;s__Inocybe_sp|SH1628291.08FU	100	5e-93	99.47	UDB034286	Fungi	Basidiomycota	Agaricomycetes	Agaricales	Inocybaceae	Inocybe	inocybe	0	0	0	2	1	3	0	0	0	0	0	0	0	0	0
OTU_303	TCGAATAAACTTGAACAGGCTGTTGCTGGCTCTCTGCATGTGCACGCTTGTCATCTTTATCTCTCCAACTGTGCACATATTGTAGACCTTGACGAGTTGGATTCGTTTCCGAGTTGGGACTGCTGCTTTGTGAAGTCGGCTTTTCCCTTGCAGGTCTATGTCCTTTTTTTCACAAACCTCTGAATCAGTTTTAGAATGTTATAATAAAAGTTAAATATA	FN550913|k__Fungi;p__Basidiomycota;c__Agaricomycetes;o__Agaricales;f__Inocybaceae;g__Inocybe;s__Inocybe_moelleri|SH1158879.08FU	97	3e-95	96.28	FN550913	Fungi	Basidiomycota	Agaricomycetes	Agaricales	Inocybaceae	Inocybe	inocybe	2	2	2	0	0	0	0	0	0	0	0	0	0	0	0
OTU_458	TTGAATGAACTTGGTGTGGTTGTTGCTGGCCCTCTTGGGGGCATGTGCACACCCGCCATTCTCATCTCTCCACCTGTGCACATCTTGTAGACTTGGATACACTTTCCGAGGCAACTCGGTCGGGAAGAATGCTGTGCTCTTGGGTCAGCTTTCTTTGCATTTCCAAGTCTATGTTTTTCATATACCCTTAGTATGTAACAGAATGTATAATTGGGCCCAGTGCCTATAAACCTTATA	UDB0778630|k__Fungi;p__Basidiomycota;c__Agaricomycetes;o__Agaricales;f__Hymenogastraceae;g__Hymenogaster;s__Hymenogaster_sp|SH1563826.08FU	100	8e-122	100	UDB0778630	Fungi	Basidiomycota	Agaricomycetes	Agaricales	Hymenogastraceae	Hymenogaster	hebeloma-alnicola	0	0	0	0	0	0	0	0	0	0	0	0	4	0	2
OTU_317	TTGAAATAAACTTGATGAGTTGCTGCTGGTTCTTTAAAGGAACACTGTGCACACTTGTCACCTTTATATCTCCACCCTGTGCACCTTTTGTAGACCTGGATGTCTCTCCGAGTGGGCTTTCACTTGGGTTTGAGGATTGACTTTATTGTCCTTTACCTTACATTTCCAGGTCTATGTTTACATATCCCCAATCTATGTTATAGAATGTGTAATGGGCCTTTGTGCCTATAAACCTATA	KR011131|k__Fungi;p__Basidiomycota;c__Agaricomycetes;o__Agaricales;f__Cortinariaceae;g__Cortinarius;s__Cortinarius_ochroamarus|SH1504034.08FU	100	8e-102	94.69	KR011131	Fungi	Basidiomycota	Agaricomycetes	Agaricales	Cortinariaceae	Cortinarius	cortinarius	0	0	0	1	3	2	0	0	0	0	0	0	0	0	0
OTU_292	ATGAGTTGTGATGGGGTTTGATGCTGGCAGCCAATTTTTTTTGGATGCATGTGCTTGCCCTGACAATCATATTCCAAACACCTGTGCACATTTTTGAGGGAATCAAGTTGATTTTCATCTTGAATTCCCTTGAATTACTATACACTGTCAATAATGCTGAACGTGCTTGTGCCGCAAGGCCATTAATATAATA	JQ666494|k__Fungi;p__Basidiomycota;c__Agaricomycetes;o__Cantharellales;f__Clavulinaceae;g__Clavulina;s__Clavulina_sp|SH1546096.08FU	100	8e-96	99.48	JQ666494	Fungi	Basidiomycota	Agaricomycetes	Cantharellales	Clavulinaceae	Clavulina	clavulina	0	0	0	2	0	4	0	0	0	0	0	0	0	0	0
OTU_316	CTGAATTGTCAACAAGAGTTGTTGCTGGTCCCCAAATGGGGACACGTGCACGCTCTGTTAACACATCCACTCACACCTGTGCACCCTCTGTAGTTCTATGGTTGGGGGGGACCCGTCTTCTCCTGCTGTGGTTCTGCATCTTTACATACACACTGTAACAAAGTCTCATGGAATGCATGCCGCGTTTAACGCAATAAAATA	KM247760|k__Fungi;p__Basidiomycota;c__Agaricomycetes;o__Thelephorales;f__Thelephoraceae;g__unidentified;s__Thelephoraceae_sp|SH1502215.08FU	100	7e-102	100	KM247760	Fungi	Basidiomycota	Agaricomycetes	Thelephorales	Thelephoraceae	_	tomentella-thelephora	0	0	0	0	0	0	0	2	3	1	0	0	0	0	0
OTU_490	TCGTACAACGGAGGCGCGAGGGCTGTCGCTGACCTTCAAAGGTCGTGCACGCCCGGGCCCTCTCACAATCCATCTCACCCTTTGTGCATCACCGCGTGGGTCCCCTTTGCGGGAGGGCTCACGTTTTCACATAAAACTCGATACAGTGTAGAATGTTTTTTCTTTTCTTTTGCGGTCACACGCAATCAATA	KF617367|k__Fungi;p__Basidiomycota;c__Agaricomycetes;o__Russulales;f__Russulaceae;g__Russula;s__Russula_sp|SH1625348.08FU	100	4e-79	95.29	KF617367	Fungi	Basidiomycota	Agaricomycetes	Russulales	Russulaceae	Russula	russula-lactarius	0	0	0	2	1	2	0	0	0	0	0	0	0	0	0
OTU_976	AAAGTAATATATATTCATTGGAATATACATTTCAAACCCCTTGTCTAAACTACCTGTTGCTTCCGGCTGTTTGGGCTGTACAGCTAGCTGTATAGCCTGGCCGGAAGGTTGACATAAAATATTGTATTTAGAGTCTTCTGAATTGTTAAAACAAAAGTTA	KU176255|k__Fungi;p__Ascomycota;c__Pezizomycetes;o__Pezizales;f__Pyronemataceae;g__Pustularia;s__Pustularia_sp|SH1547530.08FU	100	3e-79	100	KU176255	Fungi	Ascomycota	Pezizomycetes	Pezizales	Pyronemataceae	Pustularia	pustularia	0	0	0	0	0	0	0	0	0	0	0	0	1	3	1
OTU_1052	TCGAATTATCAGGGCGAGGGTTGTAGCTGGCCGGTCAAACGGTATGTGCACGCCCGAGCTCGTTAATCCATTACACACCTGTGAACCTAATGTGGGCCCTTTTGGGCCCATGTCTTATCATCAACTCTGAAACGTCTATAGAATGTAAATCAATTCATTGCCCTAAAAACGCAGTAAATA	UDB014555|k__Fungi;p__Basidiomycota;c__Agaricomycetes;o__Atheliales;f__Atheliaceae;g__Piloderma;s__Piloderma_sp|SH1519416.08FU	100	3e-90	100	UDB014555	Fungi	Basidiomycota	Agaricomycetes	Atheliales	Atheliaceae	Piloderma	piloderma	0	0	0	0	0	0	0	0	0	0	0	0	5	0	0
OTU_481	TTGAATAAACCTGATGTGACTGTTAGCTGGCTTTTCGAAGCATGTGCTCGTCCGTCATCTTTAATCTCTCCACCTGTGCACATTTTGTAGTCTTGGATACCTCTCGAGGCAACTCGGATTTTAGGATCGCCGTGCTGTACAAGTCGACTTTTCTTTCATTTCCAAGACTATGTTTTTATATACACCAAAGTATGTTTAAAGAATGTCATCAATAGGAACTTGTTTCCTATAAAATTATA	UDB037039|k__Fungi;p__Basidiomycota;c__Agaricomycetes;o__Agaricales;f__Hydnangiaceae;g__Laccaria;s__Laccaria_laccata|SH1553002.08FU	100	6e-123	100	UDB037039	Fungi	Basidiomycota	Agaricomycetes	Agaricales	Hydnangiaceae	Laccaria	laccaria	0	0	0	4	1	0	0	0	0	0	0	0	0	0	0
OTU_514	TCGAATAAAACTTGAACAGGTTGCTGCTGGCTCCTTGGGGCATGTGCACGCCTGTCATTTTTACTTCATTTTCTCCACTGTGCACCAATTGTAGGTCTGCAGTTTTCTTTGATCAAGGACTGCCAGGTCTATGTTTTACAATCCCTCAATGTGTTTCGGAATGTCAAATTGATATATAATATATATATA	KP636858|k__Fungi;p__Basidiomycota;c__Agaricomycetes;o__Agaricales;f__Inocybaceae;g__Inocybe;s__Inocybe_sp|SH1551065.08FU	99	8e-91	98.93	KP636858	Fungi	Basidiomycota	Agaricomycetes	Agaricales	Inocybaceae	Inocybe	inocybe	0	0	0	0	0	0	0	0	0	0	0	0	3	1	1
OTU_805	TTGAATAAAACATTTGATAGGCTGTTGCTGGCTCTTCTAGAGTAATGTGCACGCTTGTCATTATTTTTGTTTTTTTTTCCACCTGTGCACCTTTTTGTAGACCTTGGAGAATTGTCTTGATAGATTTTTTGGGGACTGCTGTGCCTTTTGAATGAAGGGCCAGCTTTCCCTTGTCTCTCTAGGTTCTATGTTATTCACATACTCCTATGAATGTAATAGAATGTTGATCTGGGCCCTTTTAGTGCCCATAAAGTTTTTATA	JF908116|k__Fungi;p__Basidiomycota;c__Agaricomycetes;o__Agaricales;f__Inocybaceae;g__Inocybe;s__Inocybe_umbrinella|SH1649739.08FU	100	3e-131	99.23	JF908116	Fungi	Basidiomycota	Agaricomycetes	Agaricales	Inocybaceae	Inocybe	inocybe	0	4	1	0	0	0	0	0	0	0	0	0	0	0	0
OTU_386	TTGAAATAAACCTGATGGGTTGTTGCTGGTTCTCTAGGGAGCATGTGCACGCCTTGTCATCTTTATATCTCCACCTGTGCACCTTTTGTAGACCTTTCAGGTCTATGTTGCTTTTTCATTTACCCCAATGTATGTTAATAGAATGTTGTGACTATAAAATCTATA	MF139753|k__Fungi;p__Basidiomycota;c__Agaricomycetes;o__Agaricales;f__Cortinariaceae;g__Cortinarius;s__Cortinarius_caesioarmeniacus|SH1545289.08FU	100	5e-82	100	MF139753	Fungi	Basidiomycota	Agaricomycetes	Agaricales	Cortinariaceae	Cortinarius	cortinarius	0	0	0	5	0	0	0	0	0	0	0	0	0	0	0
OTU_907	TTGAAATAAACCTGATGGGTTGTTGCTGGTTCTCCAGGGAGCATGTGCACACCTTGTCATCTTTATATCTCCACCTGTGCACTTTTTGTAGACCTTTTCAGGTCTATGTTGCTTCATTTTACCCCAATGTATGTTAATAGAATGTTGTACCTATATAATATATA	KX355528|k__Fungi;p__Basidiomycota;c__Agaricomycetes;o__Agaricales;f__Cortinariaceae;g__Cortinarius;s__Cortinarius_helobius|SH1545246.08FU	100	2e-81	100	KX355528	Fungi	Basidiomycota	Agaricomycetes	Agaricales	Cortinariaceae	Cortinarius	cortinarius	0	0	0	0	0	0	0	0	0	0	0	5	0	0	0
OTU_471	TTGATAGTTTTTATTATCAAAAACCCCTTTGTTTATCATTTACCATGTTGCTTCCATTGGACAGACCGGCATTGTGTATACAAGTTGGTCCTCTAGTTTTGTGTTTATTTGTCACTAGCTAGGGAGCTGCCAGTGGATAAAATCCCAATAAAACATTCATGAAGAAACATATATTGTCTGATTTATTAGTACAAAAAATA	MG761279|k__Fungi;p__Ascomycota;c__Pezizomycetes;o__Pezizales;f__Pezizaceae;g__unidentified;s__Pezizaceae_sp|SH1233125.08FU	100	2e-101	100	JQ318668	Fungi	Ascomycota	Pezizomycetes	Pezizales	Pezizaceae	_	galactinia	0	3	2	0	0	0	0	0	0	0	0	0	0	0	0
OTU_1686	CCGAATTGTCAACACGAGTTGTTGCTGGTCCTCAAAACGGGGGCACGTGCACGCTCTGTTCACACATCCACTCACACCTGTGCACCCTCTGTAGTTCCATGGTGTGGGGGACTCTGTCCTCCTGTTGTGGTCCTACGTCTTTACACACACTCTGTAACAAAGTCTCATGGAATGCATGACGCGTTTAACGCAATACAATA	LC013847|k__Fungi;p__Basidiomycota;c__Agaricomycetes;o__Thelephorales;f__Thelephoraceae;g__unidentified;s__Thelephoraceae_sp|SH1502252.08FU	100	2e-101	100	LC013847	Fungi	Basidiomycota	Agaricomycetes	Thelephorales	Thelephoraceae	_	tomentella-thelephora	0	0	0	0	0	0	0	0	0	0	0	5	0	0	0
OTU_914	CCGAATTGTCAACACGAGTTGTTGCTGGTCCTCGAATGGGGGCATGTGCACACTCTGTTTGCATATCCACTCACACCTGTGCACCCTCCATAGTTCTGCAGCCCTGGGGGCTCTGTCCCCTGCTGTGGTCCTATGTATTTACACACACACACTGTGATAAAGTCTCATGGAATGTATGCCGCGTTTAACGCAATACAATA	KY684674|k__Fungi;p__Basidiomycota;c__Agaricomycetes;o__Thelephorales;f__Thelephoraceae;g__unidentified;s__Thelephoraceae_sp|SH1502475.08FU	100	2e-101	100	KY684674	Fungi	Basidiomycota	Agaricomycetes	Thelephorales	Thelephoraceae	_	tomentella-thelephora	0	0	0	0	0	0	0	0	0	0	0	5	0	0	0
OTU_555	ATGAAATGTTTGTCGAGAAGGGTTGTAGCTGGCCTCCAGGGGCATGTGCACACCCTGATCGCATCCACCTCCCACACCTGTGCACCGCCTGTAGCTTGGGATGATCACGGAGCCCTGATGGGCGACGAATGCCCTCGTCTATGAATATTCTCACACACGCTCAAAGTATGACAGAATGTATATCATATTGCGTCTGATAAACGCGACAAATA	KF617868|k__Fungi;p__Basidiomycota;c__Agaricomycetes;o__Thelephorales;f__Thelephoraceae;g__Tomentellopsis;s__Tomentellopsis_sp|SH1518347.08FU	100	2e-106	99.53	KF617868	Fungi	Basidiomycota	Agaricomycetes	Thelephorales	Thelephoraceae	Tomentellopsis	tomentellopsis	0	0	0	1	3	0	0	0	0	0	0	0	0	0	0
OTU_1028	ATGATTGCGAATGGTCACCTTCAGTGCTGGCTCGCAAGAGCAAGTGCACGTTGGTGGCTTTCATCCAATTCCACACCCTGTGAACCTTTGGCCTCTTGCCGGCTTTGGCTGGCAGAGGATTTTACATATACTCGAATGTAATGAAAACGATTGTTGTGCGCAAGCACTAATATA	HQ331006|k__Fungi;p__Basidiomycota;c__Agaricomycetes;o__Sebacinales;f__Sebacinaceae;g__Sebacina;s__Sebacina_sp|SH1561864.08FU	100	3e-80	97.7	HQ331006	Fungi	Basidiomycota	Agaricomycetes	Sebacinales	Sebacinaceae	Sebacina	sebacina	0	0	0	0	0	0	0	0	0	0	0	0	4	0	0
OTU_403	ATGATTGCGAATGGTCGCCCTCGGTGCTGGCTCGTAAGAGCAAGTGCACGTTGGTGGCTTTCATCCAATACCCCTGTGAACCTTTGGCCTCTTGCTAGCTCTGGCTGGCAGAGGATTTTTATACACACACTCGAATGTAATGAAAACTATTGTCGTGCGCAAGCACTAATGTA	KC986285|k__Fungi;p__Basidiomycota;c__Agaricomycetes;o__Sebacinales;f__Sebacinaceae;g__Sebacina;s__Sebacina_sp|SH1561867.08FU	100	2e-86	100	KC986285	Fungi	Basidiomycota	Agaricomycetes	Sebacinales	Sebacinaceae	Sebacina	sebacina	0	0	0	0	0	0	4	0	0	0	0	0	0	0	0
OTU_592	TTGATTGTGAATCGTTGCCTTCAGTGCTGGCCCCGGCAAGTGCACGTTGGTGACTTTCATCCAATACCCCTGTGAACTTCTGGCCTCTTGCTAGCTTCGGCTGGCAGAGGATTTTTTTACACACACTCGAATGTAATGAAACCTATTGTTGTGCGCAAGCACTAATGTA	JX630424|k__Fungi;p__Basidiomycota;c__Agaricomycetes;o__Sebacinales;f__Sebacinaceae;g__Sebacina;s__Sebacina_sp|SH1561853.08FU	100	3e-80	98.82	JX630424	Fungi	Basidiomycota	Agaricomycetes	Sebacinales	Sebacinaceae	Sebacina	sebacina	0	0	0	0	0	0	0	0	0	0	0	0	0	4	0
OTU_1766	TCGTACAACTGAGGCACAAGGGCTGTCGCTGACTTTTGTGTCGTGCACGCCCGAGTGCTCTCAAACATCCATCTCACCCCTATGTGCACCACCGCGTGGGTCCCCTTTTGGCTTGTCCAGAGGGGGGCTCGCGTTTTCACACAAACTCGATACAGTGTAGAATGTCTTCCTTTGCGATCACACGCAATTAATA	EF434062|k__Fungi;p__Basidiomycota;c__Agaricomycetes;o__Russulales;f__Russulaceae;g__Russula;s__Russula_sp|SH1509110.08FU	100	8e-96	99.48	EF434062	Fungi	Basidiomycota	Agaricomycetes	Russulales	Russulaceae	Russula	russula-lactarius	0	0	0	3	1	0	0	0	0	0	0	0	0	0	0
OTU_474	TCGAATAAACTTGAACAGGCTGTTGCTGGTCCCTCGGGGTATGTGCACGCTTGTCTCATCTTTGTTATTTTCTCCCACTTGTGCACCTTTTGTAGACTCTGGAGCTTTGTGGATTTTCTGAAAATTCGAGTCGGGACTGCCGTGCTTTGTTGTGAAGTCGGCTTTGCCTTGCATTCTCCAGGTCTATGTCATTTTCACAACCTCTTGAAACATGTTTAGAATGTTGGATAAAATGAAATATA	MH734496|k__Fungi;p__Basidiomycota;c__Agaricomycetes;o__Agaricales;f__Inocybaceae;g__Inocybe;s__Inocybe_sp|SH1564049.08FU	100	1e-124	100	MH734496	Fungi	Basidiomycota	Agaricomycetes	Agaricales	Inocybaceae	Inocybe	inocybe	0	0	0	0	0	0	0	4	0	0	0	0	0	0	0
OTU_687	TTGAATAAACGTGATAGGCTGTTGCTGGCTTCCCTATCAAGGGGGCATGTGCACGCTTGTCATCTTTGTTTTTCCACTTGTGCACTCTTTGTAGACCCTAGAGAAGATACTGTCTGTGAAAATCAGATAGGTTGAGGAACTGCTGTGTCTTTCAATGGGGGAGGCCAGCTTTACCTTGTATAATATCTAGGTTCTATGTCATTCACATACTCCTATGAATGTAATAGAATGTTGACCTGGGTCTTTTGGTACCTATAAAGTTATATA	MG495392|k__Fungi;p__Basidiomycota;c__Agaricomycetes;o__Agaricales;f__Inocybaceae;g__Inocybe;s__Inocybe_sp|SH1527782.08FU	100	4e-135	99.25	MG495392	Fungi	Basidiomycota	Agaricomycetes	Agaricales	Inocybaceae	Inocybe	inocybe	0	0	0	0	0	0	1	1	2	0	0	0	0	0	0
OTU_671	TTGAATGAACTTGGTGTGGTTGTTGCTGGCCCTTTCGGGGGTATGTGCACACCCGCCATCCTCATCTCTCCACCTGTGCACCTCTTGTAGATTGGATTGACTTTCCGAGGCAACTCGGTCGGGAGGATTGCTGGCACTAGCTGGCTTTCTTTGCATTTCCAGGTCTATGTTTTTCATATACCCCATTGTATGTAACAGAATGTAATATTGGGCCCTTGTGCCTATAAACCTTATA	KX905038|k__Fungi;p__Basidiomycota;c__Agaricomycetes;o__Agaricales;f__Hymenogastraceae;g__Hebeloma;s__Hebeloma_celatum|SH1563789.08FU	100	5e-119	99.58	KX905038	Fungi	Basidiomycota	Agaricomycetes	Agaricales	Hymenogastraceae	Hebeloma	hebeloma-alnicola	0	0	0	0	0	0	0	1	3	0	0	0	0	0	0
OTU_1039	TTGAAATAAACCTGATGGGTTGTTGCTGGTTCTCCAGGGAGCATGTGCACACCTTGTCATCTTTATATCTCCACCTGTGCACTCTTTGTAGACCTGAAAAGGTCTATGTTGCTTCATTTTACCCCAATGTATGTTAATAGAATGTTGTACCTATATAATATATA	KY964805|k__Fungi;p__Basidiomycota;c__Agaricomycetes;o__Agaricales;f__Cortinariaceae;g__Cortinarius;s__Cortinarius_vernus|SH1545551.08FU	100	2e-81	100	KY964805	Fungi	Basidiomycota	Agaricomycetes	Agaricales	Cortinariaceae	Cortinarius	cortinarius	0	0	0	0	0	0	0	0	0	4	0	0	0	0	0
OTU_1100	TTGAAATAAACCTGATGAGTTGTTGCTGGTTCTCTAAAGAGCATTGTGCACGCTTGTCATCTTTATGTCTCCACCTGTGCACATTTTGTAGACCTGAATCACTCTCTGAAATGCTAACCAGTGTTTTAGGTTGGAGGAATCTGACTTTGTTGTCTTTCCTTGCATTTCTAGGTCTATGTTCTTTTTCATATAATCTTATTGTGATATAATGGGCCATATATAATATAAACCTATA	JX436882|k__Fungi;p__Basidiomycota;c__Agaricomycetes;o__Agaricales;f__Cortinariaceae;g__Cortinarius;s__Cortinarius_fennoscandicus|SH1503718.08FU	100	1e-120	100	JX436882	Fungi	Basidiomycota	Agaricomycetes	Agaricales	Cortinariaceae	Cortinarius	cortinarius	0	0	0	1	1	2	0	0	0	0	0	0	0	0	0
OTU_438	TTGAAATAAACCTGATGGGTTGTTGCTGGCTCTCCAGGGAGCATGTGCACGCCTTGTCATCTTTATATCTCCACCTGTGCACCTTTTGTAGACCTTCCCAGGTCTATGTTGCTTCATCTACCCCAATGTATGTCAATAGAATGTATGTGCCTATGAAATTTATA	UDB036752|k__Fungi;p__Basidiomycota;c__Agaricomycetes;o__Agaricales;f__Cortinariaceae;g__Cortinarius;s__Cortinarius_pholideus|SH1556104.08FU	100	2e-81	100	UDB036752	Fungi	Basidiomycota	Agaricomycetes	Agaricales	Cortinariaceae	Cortinarius	cortinarius	0	0	0	4	0	0	0	0	0	0	0	0	0	0	0
OTU_460	AAGAATTTATAATCCGGCGAAAGGGGGACGGGGGAAGCTGTCGCTGGCCTTTCGCGAGGCATGTGCACGCTTTCTTCTGAACCCTCAGCCGTATGGGCGCGGGGCGACCCGCGTCTTCATATACCCCTTCGTGTAGAAAGTCTTTGAACGTTATAAAATCATCGAGTCGCGACTTCTAGGAGACGCGATTCTTTGAGACAAAAGTTAATTA	KT964683|k__Fungi;p__Basidiomycota;c__Agaricomycetes;o__Boletales;f__Suillaceae;g__Suillus;s__Suillus_cavipes|SH1224298.08FU	100	2e-106	99.53	KT964683	Fungi	Basidiomycota	Agaricomycetes	Boletales	Suillaceae	Suillus	suillus-rhizopogon	0	0	0	1	2	0	0	0	0	0	0	0	0	0	0
OTU_644	GTGATTGTGAATCGTTGCCTACTGTGCTGGCTCTCCGGCATGTGCACGTTGGTGGCTTTCATCCACACCTTTTGTGAACCTTTGGCCTCTTGCTAGCTTTGGCTGGCAGGAGGATTTTACATACACTCAAATGTAATGAAAACCCTTTTGTGCACATGCACTAATGTA	KF000524|k__Fungi;p__Basidiomycota;c__Agaricomycetes;o__Sebacinales;f__Sebacinaceae;g__Sebacina;s__Sebacina_sp|SH1561854.08FU	99	2e-46	87.06	KF000524	Fungi	Basidiomycota	Agaricomycetes	Sebacinales	Sebacinaceae	Sebacina	sebacina	0	0	0	0	0	0	0	3	0	0	0	0	0	0	0
OTU_922	ATGATTGCGAATGGTTGCCTTCGGTGCTGGCTCTTGCAAGTGCACGTTGGTGGCTTTCATCCCAATACCCTTTGTGAACCTTTAGCCTCTTGCTAGCTTCGGCTGGCAGAGGATTTTTACACACACTCGAATGTAATGAAAACTATTGTCGTGCGCAAGCACTAATGTA	KF000524|k__Fungi;p__Basidiomycota;c__Agaricomycetes;o__Sebacinales;f__Sebacinaceae;g__Sebacina;s__Sebacina_sp|SH1561854.08FU	100	3e-80	98.82	KF000524	Fungi	Basidiomycota	Agaricomycetes	Sebacinales	Sebacinaceae	Sebacina	sebacina	0	0	0	0	0	0	0	0	0	0	0	3	0	0	0
OTU_1548	TCGAATAAACTTGAACAGGCTGTTGCTGGTCTCTCATTGTAGACATGTGCACGCTTGTCTCATCTTTATCATTTCTCCAACTGTGCACATTTTGTAGACCCTGGAGTCTTTTTGGATATTTTGTTTTCAGAGATCAGGACTGCTGTGCTTCTTGTTTTTGAAGTCAGCTTTTCCTTGCATCTCCAGGTCTATGTCATTTCTCATAATCTCTCAAATGTTTAGAATGGTTGAATAAAAAGGTGCTTTTGGTACCTATAAAAGTTATAATA	EU326161|k__Fungi;p__Basidiomycota;c__Agaricomycetes;o__Agaricales;f__Inocybaceae;g__Inocybe;s__Inocybe_sp|SH1506647.08FU	99	3e-102	92.51	EU326161	Fungi	Basidiomycota	Agaricomycetes	Agaricales	Inocybaceae	Inocybe	inocybe	0	0	0	0	0	0	0	0	0	1	0	2	0	0	0
OTU_429	TTGAATAAACTTGAACAGGCTGTTGCTGGCCCTCCTTGGAGGGATATGTGCACGCTTGTCATCTTTATTTCTCCAACTGTGCACATAATTGTAGACCTTGATATTTGATGGATTTATTTTCGAGTTGGGGACTGCTGTGCTTTTCTCAAGTCGGCTTTCCCTTGTATTTTTCAGGTCTATGTCATTTATCACAAACCTCAGAGTCTGTTTAGAATGTTGAATCAGGTCATTTTGTACCTATAAAGTTAATATA	JQ318630|k__Fungi;p__Basidiomycota;c__Agaricomycetes;o__Agaricales;f__Inocybaceae;g__Inocybe;s__Inocybe_sp|SH1527486.08FU	100	1e-130	100	JQ318630	Fungi	Basidiomycota	Agaricomycetes	Agaricales	Inocybaceae	Inocybe	inocybe	1	1	0	0	0	0	1	0	0	0	0	0	0	0	0
OTU_1408	TCATGTCATTCAGTCATGCTGCCGCATGAACTGTACAAATCCACTCTGCGTACCCTATCCTGTTGCTTCCGCTGGGCCCAGAGCATTTTGGAGGGGTTGCCTCTTGCATGGTTAATATCTGTGCAGAGTTGGCTGTCCTCTGGGGCTGCTCTGGATTCACATGCCTGGCGGGAGGATACTTAATCTCTGAATTTACTATTTCATCTGTCTGATCTATGAATCAAAAAAAATATTTAA	MG019768|k__Fungi;p__Ascomycota;c__Pezizomycetes;o__Pezizales;f__Pyronemataceae;g__Humaria;s__Humaria_sp|SH1608586.08FU	97	4e-90	93.04	MG019768	Fungi	Ascomycota	Pezizomycetes	Pezizales	Pyronemataceae	Humaria	genea-humaria	0	1	2	0	0	0	0	0	0	0	0	0	0	0	0
OTU_1785	TTGAAATAAACCTGATGGGTTGTTGCTGGTTCTCTTGGGAGCATGTGCACGCCTTGTAATCTTTATATCTCCACCTGTGCACCTTTTGTAGACCTTTCAGGTCTATGTTGCTTCATTTACCCCAATGTATGTTAATAGAATGTTGTGCCTTATATAATAATATA	KY287740|k__Fungi;p__Basidiomycota;c__Agaricomycetes;o__Agaricales;f__Cortinariaceae;g__Cortinarius;s__Cortinarius_flexipes|SH1545275.08FU	100	9e-80	99.39	KY287740	Fungi	Basidiomycota	Agaricomycetes	Agaricales	Cortinariaceae	Cortinarius	cortinarius	0	0	0	1	2	0	0	0	0	0	0	0	0	0	0
OTU_330	TTGAAATAAACCTGATGAGTTGTTGCTGGTTCTCTAGAGAGCATCGTGCACGCTTGTCATCTTTATGTCTCCACCTGTGCACATTTTGTAGACCTGGATCACTCTCTGAAATGCTAACCAGCATTTTAGGTTGGAGGAATTTGACTTTGTTGTCTTTCCTTGCATTTCTAGGTCTATGTTCTTTTTCATATAATCTTATTGTGATATAATGGACCCTATATAATATAAACCTATA	JX436887|k__Fungi;p__Basidiomycota;c__Agaricomycetes;o__Agaricales;f__Cortinariaceae;g__Cortinarius;s__Cortinarius_sp|SH1503718.08FU	100	1e-120	100	JX436887	Fungi	Basidiomycota	Agaricomycetes	Agaricales	Cortinariaceae	Cortinarius	cortinarius	0	0	0	1	1	1	0	0	0	0	0	0	0	0	0
OTU_371	TTGAAATAAACCTGATGGGTTGCTGCTGGTTCATTAATGAATATGTGCGCATCTGTCATCTTTATATCTCCACCTGTGCACTTTTTGTAGACCTGGATAAGTTTCTTAATGCTAGCATTAAGGTTTGAGGACTGACTTTTGTCTCTCCTTACATTTCCGGTCTATGTTTATTCATATACCCTAATGTATGTTAAAGAATGTAATAATTGGGCGTTTGTGCCTATAACACTATA	UDB0778388|k__Fungi;p__Basidiomycota;c__Agaricomycetes;o__Agaricales;f__Cortinariaceae;g__Cortinarius;s__Cortinarius_anomalus|SH1503789.08FU	100	1e-119	100	UDB0778388	Fungi	Basidiomycota	Agaricomycetes	Agaricales	Cortinariaceae	Cortinarius	cortinarius	0	0	0	1	2	0	0	0	0	0	0	0	0	0	0
OTU_430	TTGAAATAAACCTGATGGGTTGTTGCTGGCTCTCTAGGGAGCATGTGCACGCCTTGTCATCTTTATATCTCCACCTGTGCACTTTTTGTAGACCCTTTTTTTAAAAAGGGTCTATGTTGCTTCATTTTACCTCAATTGTATGTCAATAGAATGTTGTGCCTATATAATATATA	HQ604704|k__Fungi;p__Basidiomycota;c__Agaricomycetes;o__Agaricales;f__Cortinariaceae;g__Cortinarius;s__Cortinarius_hinnuleus|SH1545280.08FU	100	4e-83	98.84	HQ604704	Fungi	Basidiomycota	Agaricomycetes	Agaricales	Cortinariaceae	Cortinarius	cortinarius	0	0	0	0	0	3	0	0	0	0	0	0	0	0	0
OTU_789	TTGAAATAAACCTGATGGGTTGCTGCTGGCTCTCTAGGGAGCATGTGCACACTTGTCATCTTTATATCTCCACCTGTGCACCTTTTGTAGATCTGGATATCTTTCTGAATGCCTGGCATTCAGGTTTGAGGAATTGACTTTTGACTTTTCCTTACATTTCCAGGCCTATGTTTTCTTCATATACACCATTTATGTTATAGAATGTAATTGAAAGGGCCTTTGTGCCTACAAACGTTATA	MG786245|k__Fungi;p__Basidiomycota;c__Agaricomycetes;o__Agaricales;f__Cortinariaceae;g__Cortinarius;s__Cortinarius_sp|SH1503716.08FU	100	2e-112	97.49	MG786245	Fungi	Basidiomycota	Agaricomycetes	Agaricales	Cortinariaceae	Cortinarius	cortinarius	3	0	0	0	0	0	0	0	0	0	0	0	0	0	0
OTU_753	TCGAATAAATTTAGAGTTGGTTGTCGCTGGTTCTCTTGAACATTTGTGCACGCCTTCTCTTATTTTTTCATCCACACACACCCCCTGTGCACTTGTGAGACGGGAAGGGCTTAAAAACCCCTGCCGTCTACTGTCACATACAAACTCATTTAAATTAAACTGAATGTAATTGATGTAACGCATCATTTTAAAAC	KT122780|k__Fungi;p__Basidiomycota;c__Agaricomycetes;o__Cantharellales;f__Ceratobasidiaceae;g__Ceratobasidium;s__Ceratobasidium_sp|SH1184509.08FU	99	1e-69	91.46	KT122780	Fungi	Basidiomycota	Agaricomycetes	Cantharellales	Ceratobasidiaceae	Ceratobasidium	ceratobasidium3	0	0	0	0	0	0	2	0	1	0	0	0	0	0	0
OTU_939	TCGAATAAACTTGAACAGGCTGTTGCTGGTCCCTTTGGGGGCATGTGCACACTTGTCATCTTTGTGATTTCTCCAAAAACTGTGCACCTCTTGTAGACCTGGAGCTGGATTTCATTCGAGTTGGGAACTGCTGTGCTTCTCACAAGTCAGCTTTGCCCTTGCATTTCCATGGTCTATGTTTACACAAAAACATGTTTTTAGAATGGTTGGCCTAATATTATAAAAGTTGTA	FR852239|k__Fungi;p__Basidiomycota;c__Agaricomycetes;o__Agaricales;f__Cortinariaceae;g__unidentified;s__Cortinariaceae_sp|SH2700066.08FU	100	3e-115	99.13	FR852239	Fungi	Basidiomycota	Agaricomycetes	Agaricales	Cortinariaceae	_	cortinarius	0	0	0	0	0	0	0	0	0	0	0	3	0	0	0
OTU_1125	TAGAGGGCTACGGCTCCCTGTTTGATATTACCAAATTGATATTTTCTTCTCTGTTGCTTCCACCTTCTATGACCCTGTTATCGATAGTGGGAGGTTTTTTCAATACTATTTTTCTTGCTGAGACTTTTGAATTGTCTGAATATATGAGGGAAAATGCTATA	UDB026743|k__Fungi;p__Ascomycota;c__Pezizomycetes;o__Pezizales;f__Pezizaceae;g__Hydnobolites;s__Hydnobolites_sp|SH1539144.08FU	100	4e-78	99.38	UDB026743	Fungi	Ascomycota	Pezizomycetes	Pezizales	Pezizaceae	Hydnobolites	marcelleina-peziza	0	0	0	0	0	0	0	0	0	1	0	2	0	0	0
OTU_1307	ACGAATTGTAATGGGAGTTTGATGCTGGCGAAGTGGGAAACACTTTTGCATGTGCTTGCTTCCAACAATTTTATCCAAACACCTGTGCACCTTTTGAAGGGAGATAAATCTTTATGGGTTTCTCTCTTCATTTTTTACATACACGCTGATTTTAATGTTGAATGTGCTATGTGCCTTATTTTGATAAGTGCCTTGAACGAATA	KY65487|k__Fungi;p__Basidiomycota;c__Agaricomycetes;o__Cantharellales;f__Clavulinaceae;g__Clavulina;s__Clavulinaceae_sp|SH1553217.08FU	100	5e-98	98.52	HQ444977	Fungi	Basidiomycota	Agaricomycetes	Cantharellales	Clavulinaceae	Clavulina	clavulina	0	0	0	0	0	0	0	0	0	0	0	0	0	1	2
OTU_1999	ACGAATTGTACTGGAGGGTTGATGCTGGAAGCCATTTCATGTGCTCGCCCCCTAACAATCTTCATCCAACCGCCACCCGTGCACATTTCTGGAGGGGGGAGGGGGGGTTTCTCTAAGTTTGATTGCCTTGTTGGTGATTTTTCTTCGGGGTTTCCTTCCTATCTCCCCTCATACACACACACTGCCTTTACAACATTGAACGTGATTGTGCCGCAAGGCCTTTGTTGCAATA	LS978973|k__Fungi;p__Basidiomycota;c__Agaricomycetes;o__Cantharellales;f__Clavulinaceae;g__Clavulina;s__Clavulinaceae_sp|SH1561354.08FU	100	2e-117	99.57	KY684385	Fungi	Basidiomycota	Agaricomycetes	Cantharellales	Clavulinaceae	Clavulina	clavulina	0	0	0	0	0	0	0	1	2	0	0	0	0	0	0
OTU_414	TCGTAACAACGACGGAGGTGCGACGGCTGTCGCTGACCTTTTCTGAGGTCGTGCACGCCCGAGCCCCTCTCTCACAATCCATCTCACCCCTTGTGCATCACCGCGTGGGTCCTTTCCCCTTTGTGGGAGGGGCTCGCGTTTTCACACAAAACTCGATACAGTGTAGAATGTTTAATTTATTTGCGGTCACACGCGATACAATA	MH005855|k__Fungi;p__Basidiomycota;c__Agaricomycetes;o__Russulales;f__Russulaceae;g__unidentified;s__Russulaceae_sp|SH2592483.08FU	100	1e-99	99.01	MH005855	Fungi	Basidiomycota	Agaricomycetes	Russulales	Russulaceae	_	russula-lactarius	1	0	1	0	0	0	0	0	0	0	0	0	1	0	0
OTU_1029	CTGAATTGTCAACAAGAGTTGTTGCTGGTCCTCGAATGGGGGCATGTGCACGCTCTGTTCACACATCCACTCACACCCTGTGCACTCTCTGTAGTTCTATGGCCAGGGGGCCTGCCCTCCTGCTGTGGTTCTGCATCTTTACACACACACTGTAACAAAGTCTCATGGAATGCATGTCGCGTTTAACGCAATACAATA	MT229506|k__Fungi;p__Basidiomycota;c__Agaricomycetes;o__Thelephorales;f__Thelephoraceae;g__unidentified;s__Thelephoraceae_sp|SH1502234.08FU	100	3e-100	100	KX510035	Fungi	Basidiomycota	Agaricomycetes	Thelephorales	Thelephoraceae	Tomentella	tomentella-thelephora	0	0	0	0	0	0	0	0	0	2	0	1	0	0	0
OTU_1099	CCGAATTGTCAACAAGAGTTGTTGCTGGTCTCCGTATGGGGGCATGTGCACGCTCTGTTTACACATCCACTCACACCTGTGCACCCTCTGTAGTTCTATGGCCTGGGTGGGCTCTGTCCCCCTGCTGTGGTTCTGCGTCTTTACACACACACTACAATGAAGTCTCATGGAATGTATGTCGCGTTTAACGCAATGAAATA	EU668252|k__Fungi;p__Basidiomycota;c__Agaricomycetes;o__Thelephorales;f__Thelephoraceae;g__unidentified;s__Thelephoraceae_sp|SH1528472.08FU	100	2e-101	100	JX625366	Fungi	Basidiomycota	Agaricomycetes	Thelephorales	Thelephoraceae	Tomentella	tomentella-thelephora	0	0	0	0	0	0	0	0	0	0	0	3	0	0	0
OTU_517	CCGAATCGTCAACACGAGTTGTTGCTGGTCCTCAAAACGGGGGCATGTGCACGCTCTGTTTACGCATCCACTCACACCTGTGCACCCTCTGTAGTTCCGTGGCGTGGGGGACTCTGTCCTCCTGTTGTGGTCCTACGTCTTTACACACACTCTGTAACAAAGTCTCATGGAATGCATGGCGCGTTTAACGCAATACAATA	JF748101|k__Fungi;p__Basidiomycota;c__Agaricomycetes;o__Thelephorales;f__Thelephoraceae;g__unidentified;s__Thelephoraceae_sp|SH1140446.08FU	99	1e-98	99.49	JF748101	Fungi	Basidiomycota	Agaricomycetes	Thelephorales	Thelephoraceae	_	tomentella-thelephora	0	0	0	0	0	0	3	0	0	0	0	0	0	0	0
OTU_378	GTGAATCTTCAAAGTCGGCTCATCCGTACTGTGCTGGTGGAGACACATGTGCACGTCGGTGAGTCGCAAATCCACACACCTGTGCATCTATGACTCTGAGCGCCGCTTTGCATGGCCTTGACCGGCCTGGCGCTCGAGTACTTTCACACACTCTCGAATGTAATGGAATGTCTTGTTGTGCGTAACGTACAAACTAAAA	KF617994|k__Fungi;p__Basidiomycota;c__Agaricomycetes;o__Sebacinales;f__Sebacinaceae;g__unidentified;s__Sebacinaceae_sp|SH1577280.08FU	100	4e-94	97.99	HQ211732	Fungi	Basidiomycota	Agaricomycetes	Sebacinales	Sebacinaceae	Serendipita	serendipita1	0	0	0	1	2	0	0	0	0	0	0	0	0	0	0
OTU_332	TTAGAATTCCGGTGTCATCAAGGGCTCCGATGCAAACACATACCTGTGTATTCTTCCATGTTGCTTCCCCAGATCAGTGGCTATGGCCACCAGCCCATGTCCTAACGGGTTCATGAGGTTGAGCAATCTGGGGGAGGGTCCATTATCAAACCTTTACCTAATGTGTTGTCTGAGAAGGCCTTGTGCCATAATCTTGAAACATGTTA	KC707773|k__Fungi;p__Ascomycota;c__Pezizomycetes;o__Pezizales;f__Tuberaceae;g__Tuber;s__Tuber_sp|SH1648994.08FU	100	2e-101	99.03	KC707773	Fungi	Ascomycota	Pezizomycetes	Pezizales	Tuberaceae	Tuber	tuber-helvella	0	0	0	0	0	0	0	2	0	0	0	0	0	0	0
OTU_1454	TTGAATAAGCTTGGTTGGGTTGTTGCTGGCTCTCCGGAGCATGTGCACGCCTGACAACCAACCTTTTACCACCTGTGCACCTTTTGTAGACCTGGATATCTCTCGAGGAAACTCGGTTTTGAGGATTGCCGTGCGCAAGCCGGCTTTCCTTGCACTTCCGGTCTATGTTTTTATATACCCCTACACATGTTTTAGAATGTCATTAATGGGCTTAACTGCCTTTAAATCTATA	MF034195|k__Fungi;p__Basidiomycota;c__Agaricomycetes;o__Agaricales;f__Tricholomataceae;g__Tricholoma;s__Tricholoma_saponaceum|SH1647747.08FU	100	5e-119	100	MF034195	Fungi	Basidiomycota	Agaricomycetes	Agaricales	Tricholomataceae	Tricholoma	tricholoma	0	0	0	0	1	1	0	0	0	0	0	0	0	0	0
OTU_755	TTGAATAAGCTTGGTTGGGTTGTTGCTGGCTCTCAGGAGCATGTGCACGCCTAACACCAACTTTTACCACCTGTGCACATTTTGTAGACCTGGATAAAACTCTCGAGGAAACTCGGTTTGAGGAATGCTGTGCGCAAGCCAGCTTTCCTTGTACTTCTGGTCTATGTTTTTATATATACACACCCCTATAGTATGTCTCGGAATGTTTGTTTGTTGGGCTTGAATGCCTTTAAACTTAATA	KF617858|k__Fungi;p__Basidiomycota;c__Agaricomycetes;o__Agaricales;f__Tricholomataceae;g__Tricholoma;s__Tricholoma_sp|SH1647746.08FU	100	2e-122	99.59	KF617858	Fungi	Basidiomycota	Agaricomycetes	Agaricales	Tricholomataceae	Tricholoma	tricholoma	0	0	0	0	1	1	0	0	0	0	0	0	0	0	0
OTU_1087	TTGAACTGTCAACACGAGTTGTTGCTGGCCCTCAAATGGGGGCATGTGCACACTCTGTTTACAAATCCACTCACACCTGTGCACCCTCAGTAGTTCTATGGTGTGGAGGACACTGTCCTCTGACCGTGGTTCTATGTCTTTACACACACACTTAGTGACAAAGTCTAATGGGATGTATGTGGCGTTTAACGCAATATAATA	UDB034279|k__Fungi;p__Basidiomycota;c__Agaricomycetes;o__Thelephorales;f__Thelephoraceae;g__Tomentella;s__Tomentella_sp|SH1528407.08FU	100	7e-102	100	UDB034279	Fungi	Basidiomycota	Agaricomycetes	Thelephorales	Thelephoraceae	Tomentella	tomentella-thelephora	0	0	0	0	0	0	0	0	0	2	0	0	0	0	0
OTU_1199	CCGAACTGTCAACACGAGTTGTTGCTGGCCTCCAGCCGGAGGCACGTGCACGCTCTGTTCACACATCCACTCACACCTGTGCACCCTCTATAGTTCTGTGGCCCGGGTAACTTTGTTCCCTCGCCACGGTTCTATATCTTTACAAACACATTGTAGTTAAGTCTTGTGGAATGTATGCCGCGTTTAACGCAATACAATA	UDB039480|k__Fungi;p__Basidiomycota;c__Agaricomycetes;o__Thelephorales;f__Thelephoraceae;g__Tomentella;s__Tomentella_atroarenicolor|SH2708154.08FU	100	2e-97	98.99	UDB039480	Fungi	Basidiomycota	Agaricomycetes	Thelephorales	Thelephoraceae	Tomentella	tomentella-thelephora	0	0	0	0	0	0	0	0	0	2	0	0	0	0	0
OTU_1355	CTGAACTGTCAACACGAGTTGTTGCTGGTCCTCAAATGGGGGCATGTGCACACTCTGTTTACACATCCACTCACACCTGTGCATCCTCTGTAGTTCCATGGTGTGGGGGACACCGTCCTCCCCCTGTGGTTCTATGTCTTTACACACACACTGTTATAAAGTCTCATGGCATGTATATAGCGGTTAACGCAATACAATA	FR852131|k__Fungi;p__Basidiomycota;c__Agaricomycetes;o__Thelephorales;f__Thelephoraceae;g__Tomentella;s__Tomentella_sp|SH1610988.08FU	100	4e-99	99.5	FR852131	Fungi	Basidiomycota	Agaricomycetes	Thelephorales	Thelephoraceae	Tomentella	tomentella-thelephora	0	0	0	0	0	0	0	0	0	0	0	2	0	0	0
OTU_957	CTGAACTGTCGACACGAGTTGTTGCTGGCCTTCAAATGGGGGCATGTGCACGCTCTGTTTACACATCCACTCACACCTGTGCACCCTCTGTAGTTCTATGGCGTGGGGGGCCCTGCCCCCCTGCTGTGGTTCTATGTCTTTACACACACACACTGTGATGAAGTCTTATGGAATGTACATCGCGTTTAACGCAATACAATA	KY684625|k__Fungi;p__Basidiomycota;c__Agaricomycetes;o__Thelephorales;f__Thelephoraceae;g__Tomentella;s__Tomentella_sp|SH1502991.08FU	100	3e-100	99.5	KY684625	Fungi	Basidiomycota	Agaricomycetes	Thelephorales	Thelephoraceae	Tomentella	tomentella-thelephora	0	0	0	0	0	0	0	0	0	2	0	0	0	0	0
OTU_2008	TCGAATTATAATCCGACGAAGGGAATAGAGTCGGCTGTCGCTGGCCTTTCGCGAGGCATGTGCACGCTTTCTTTCCTACCTTCGTCGTATGGGCGCGGGGCGACCCGCGTCTTCATATACCTCTTCGTGTAGAAAGTCTTTGAATGTTTTTTTTTACAATCGTCGAGTCGCGACTTCTAGGAGACGCGATTCTTCGAGACAAAAGTTATTA	KX213742|k__Fungi;p__Basidiomycota;c__Agaricomycetes;o__Boletales;f__Suillaceae;g__Suillus;s__Suillus_sp|SH1555210.08FU	100	1e-103	99.05	KX213742	Fungi	Basidiomycota	Agaricomycetes	Boletales	Suillaceae	Suillus	suillus-rhizopogon	0	0	0	1	1	0	0	0	0	0	0	0	0	0	0
OTU_1215	TTGATTGCGAATCGTTGCCTTCCGTGCTGGCCAGTTCTGGCAAGTGCACGTCGGTGACTTTCATCCAATACCCTGTGCACCTTTGGCCTCTGCTGGCTTCGGCCGGCAGAGGAATTTACACAAACTCGAATGTAACGAAATTTATTGTCGTGCGCAAGCACTAATGTA	HG796953|k__Fungi;p__Basidiomycota;c__Agaricomycetes;o__Sebacinales;f__Sebacinaceae;g__Sebacina;s__Sebacina_sp|SH1561922.08FU	100	5e-77	97.62	HG796953	Fungi	Basidiomycota	Agaricomycetes	Sebacinales	Sebacinaceae	Sebacina	sebacina	0	0	0	0	0	0	0	0	0	0	0	2	0	0	0
OTU_1819	TTGATTTTGATTTGTTACCTTCTGTGCTGGCTCCGGCATGTGCACGTTGGTGACTTTCATCCAATACCCTTATGTGAACCTTTGGCCTCTTGCCGGCTTTGGCTGGCAGAGGATTTACACAAACTCGAATGTAATGAAATATATTGTCGTGCGCAAGCACTAATGTA	HQ445495|k__Fungi;p__Basidiomycota;c__Agaricomycetes;o__Sebacinales;f__Sebacinaceae;g__Sebacina;s__Sebacina_sp|SH1572383.08FU	100	2e-71	95.83	HQ445495	Fungi	Basidiomycota	Agaricomycetes	Sebacinales	Sebacinaceae	Sebacina	sebacina	0	0	0	0	0	0	0	0	1	0	0	0	0	1	0
OTU_1248	CCATACGATGAAGGTACAAGGGCTGTTGCTGACCTTCCAAAGGTCGTGCACGCCCAAGTGCTCTCACACATCCATTCTACCCCTTTGTGCATCACCGCGTGGGGGTCCCCTGAAAGGGGGACGCCCACGTTTTTTCTTTCACACAAACATAGTTTAGAATGTGCCTGTTGTTTTGCGATGATACGCAATCAATA	KC505573|k__Fungi;p__Basidiomycota;c__Agaricomycetes;o__Russulales;f__Russulaceae;g__Russula;s__Russula_aurea|SH1154969.08FU	98	2e-66	91.1	KC505573	Fungi	Basidiomycota	Agaricomycetes	Russulales	Russulaceae	Russula	russula-lactarius	0	0	0	0	0	0	0	0	0	0	0	2	0	0	0
OTU_774	ATGAAATGAATGTCGAGAAGGGTTGTAGCTGGCCTTTTGGGGCATGTGCACACCTTGATCGCACATCCACCTCTCACACCTGTGCACTATGTGTAGCTTGGGATGATTACAGTGTTGGAAACGACGTTGAAAGCCCTAGCTATGAATTTTTATACACCCACATACAAAGTTATAGAATGGATAATGTTATAGCGTGTAATAGCGCGAATATATA	MK290701|k__Fungi;p__Basidiomycota;c__Agaricomycetes;o__Thelephorales;f__Thelephoraceae;g__Pseudotomentella;s__Pseudotomentella_sp|SH1564287.08FU	100	4e-109	100	MK290701	Fungi	Basidiomycota	Agaricomycetes	Thelephorales	Thelephoraceae	Pseudotomentella	pseudotomentella	0	0	0	1	0	1	0	0	0	0	0	0	0	0	0
OTU_616	TTGAAATTACTGGTGAGGGTTGTAGCTGGCCTTTCGGGGCACGTGCACGCCCGAGCCTTTAATCCACATACACCTGTGAACCTAATGTAAGGGCCCGTAAAAAAGGCCCCTACGTCTCATCCACCCCCATCGTATGTCTCATAGAATGTAAATCAATGTCCTCGCCCTAAAAAAGCGTCGATAAACTTATA	UDB026694|k__Fungi;p__Basidiomycota;c__Agaricomycetes;o__Atheliales;f__Atheliaceae;g__Piloderma;s__Piloderma_sp|SH1544843.08FU	100	6e-92	98.45	UDB026694	Fungi	Basidiomycota	Agaricomycetes	Atheliales	Atheliaceae	Piloderma	piloderma	0	0	0	1	0	1	0	0	0	0	0	0	0	0	0
OTU_857	AAAATGTAACCGGACCGGGACGTCGCGGGCGAGAGCCCCTGGCGGACCGCGAAGGGAGATATCATACACCCTGTGTTTATTTACCTTTGTTGCTTTGGCGGGCCGTCCGTAAGGCGTCGGCCCCGGCTGACCGCGCCCGCCAGAGGACCCAAACTCTTTTATCAGTGATGTCTGAGTACTATATAATAGTTA	UDB026395|k__Fungi;p__Ascomycota;c__Leotiomycetes;o__Helotiales;f__Helotiaceae;g__Meliniomyces;s__Meliniomyces_sp|SH1544249.08FU	100	6e-97	100	UDB026395	Fungi	Ascomycota	Leotiomycetes	Helotiales	Helotiaceae	Meliniomyces	meliniomyces	0	0	0	1	1	0	0	0	0	0	0	0	0	0	0
OTU_1081	CTGAAGCATTTAACAATGAGTTGTCGCTGGTCCCTTCACGGTCGATCGTGCACGCTTGTTGTTCTTCATTTCTCCATCATTTGTGCATCACCCATGTGGATCTTTGTTAGGACTGCTTTGCAAAGTTGCTATTTGTGGGGCTTTCCTTGTAACCTTTTTGATTCACATGTTTTTCACACACACACACACCAAATGTTTAGAAGGAATAATTAAAAAAAAAAAAATGAATTGTTATA	UDB015299|k__Fungi;p__Basidiomycota;c__Agaricomycetes;o__Agaricales;f__Inocybaceae;g__Inocybe;s__Inocybe_cervicolor|SH1649213.08FU	85	6e-83	94.55	UDB015299	Fungi	Basidiomycota	Agaricomycetes	Agaricales	Inocybaceae	Inocybe	inocybe	2	0	0	0	0	0	0	0	0	0	0	0	0	0	0
OTU_1362	CAGAAATAAACTTGGTGGGTTGTTGCTGGCCTCGGCACTGTGCACGCCTGTCATTTTTATCTTTCCACCTGTGCACCCTATGTAGGACCGTCGGTTCTATGTATCTTATTTTACCACATGAATGTCGTCGAACGCATAGATAATAATCTATA	KP636867|k__Fungi;p__Basidiomycota;c__Agaricomycetes;o__Agaricales;f__Inocybaceae;g__Inocybe;s__Inocybe_spiniformis|SH1168576.08FU	47	5e-17	89.04	KP636867	Fungi	Basidiomycota	Agaricomycetes	Agaricales	Inocybaceae	Inocybe	inocybe	0	0	0	0	0	0	0	0	0	0	0	0	0	0	2
OTU_1648	TTGAATAAACTTGAACAGGCTGTTGCTGGTCTCTCTCTCTCACTGAGGGCATGTGCACGCTTGTCATCTTTATTTTTCCAACTGTGCACATATTGTAGACCTGGAGTCGTCTTTTGTTGATTCATTTTCGAGTTGGCACTGCAGTGCTTTTGTAACAAAAAGTCTGCTTTGCCTTTTGGCTTTTCAGGTCTATGTCATTTTTCACAACCTCAAATGTGTTTAGAATGTTGAATCAGGTCCTTTTTTGTACCTATAAAAAAGTTAAATATA	KJ399950|k__Fungi;p__Basidiomycota;c__Agaricomycetes;o__Agaricales;f__Inocybaceae;g__Inocybe;s__Inocybe_sp|SH1632052.08FU	100	2e-127	97.41	KJ399950	Fungi	Basidiomycota	Agaricomycetes	Agaricales	Inocybaceae	Inocybe	inocybe	0	0	0	0	0	0	0	2	0	0	0	0	0	0	0
OTU_281	TTGAATAAACTTGCCCAGGTTGTTGCTGGCCCTCATGGGTATGTGCACGCTTGGCATCTTTACTTCTCCACCTGTGCACATATTGTAGGCCTGGAGTCTGTTGTTGATTCATTTCGAGTTGGGACTGCTGTGCTGTTGTAGCCAGCTTTTCCTTGCATTCTCCAGGTCTATGTCATTATCACAACCTCATAATGTGTTTAGAATGAGACCTATAAAAGTTAAATATA	AB669653|k__Fungi;p__Basidiomycota;c__Agaricomycetes;o__Agaricales;f__Inocybaceae;g__Inocybe;s__Inocybe_sp|SH1564840.08FU	100	3e-116	100	AB669653	Fungi	Basidiomycota	Agaricomycetes	Agaricales	Inocybaceae	Inocybe	inocybe	0	0	0	2	0	0	0	0	0	0	0	0	0	0	0
OTU_502	TCGAATATAAACTTGGGTAGACTGTTGCTGGCTTCTCTTTGAGGGGGCATGTGCACGTTTATCCTCTTTATTTTTCCACCTGTGCACCTTTTGTAGGCTTGGATTATCACTGGTTCTAATGTGTCTTTCAAAGGCATAAGAATTGTTTTGGGGCTGCTGTGTTTAAACGCATGTTTATCGGCTTTCCCTTTTATTTTCCAAGTCTATGTTTGCTATATACACTCCAGAAATGTAATAGAATGCTGTACTTTTAGGTCATTTGTACCTATAATAAAAATCAGTA	UDB015332|k__Fungi;p__Basidiomycota;c__Agaricomycetes;o__Agaricales;f__Inocybaceae;g__Inocybe;s__Inocybe_dulcamara|SH1527246.08FU	100	3e-147	100	UDB015332	Fungi	Basidiomycota	Agaricomycetes	Agaricales	Inocybaceae	Inocybe	inocybe	1	0	0	0	0	0	0	1	0	0	0	0	0	0	0
OTU_751	TCGAATAAACATTTGATAGGCTGTTGCTGGCCCTTCTAGGGTAGTGTGCACGCTTGTCATTTATTTATTTTATTTTTCCACCTGTGCACCCTTTTTGTAGACCAGGGTTTGGGGATTGCTGTGCCAGCTTTCCCTTGTCTCTCTAGGTTCTATGTTAACTCACATACTCCTACGAATGTAATAGAATGTTGATCTGGGTCTTTGATGCCCATAAAGTTATATA	KC965154|k__Fungi;p__Basidiomycota;c__Agaricomycetes;o__Agaricales;f__Inocybaceae;g__Inocybe;s__Inocybe_sp|SH1563618.08FU	100	4e-114	100	KC965154	Fungi	Basidiomycota	Agaricomycetes	Agaricales	Inocybaceae	Inocybe	inocybe	0	2	0	0	0	0	0	0	0	0	0	0	0	0	0
OTU_814	TCGAATAAACTTGAACAGGCTGTTGCTGGTCCTCCCCTGGAGGCATGTGCACGCTTGTCATCTTTATCATTTCTCCAACTGTGCACATATTGTAGACCTGGAGTTTTTGGAATTCGTTCCGAGTCGGGACTGCTGCGCTTCGTTTTTCAAGAGGTCGGCTTTTCCTTGCATTTTTCAGGTCTATGTTCATTTCACAACCTCTGTAAAATGTGTTTTAGAATGGTTGAATCATAATAAAGTTTATA	LC035199|k__Fungi;p__Basidiomycota;c__Agaricomycetes;o__Agaricales;f__Inocybaceae;g__Inocybe;s__Inocybe_sp|SH1522283.08FU	100	5e-104	94.42	LC035199	Fungi	Basidiomycota	Agaricomycetes	Agaricales	Inocybaceae	Inocybe	inocybe	1	1	0	0	0	0	0	0	0	0	0	0	0	0	0
OTU_1234	TTGAATGAACTTGGTGTGGTTGTTGCTGGCCCCTGGGGGCATGTGCACACCCACCATCCTCATCTCTCCCCCTGTGCACCTCTTGTAGACTTGGGATAAAACTTTCCGAGGCAACTCGGTCTGGAGGAATGCTACCCCAAGCTTTCCTTGTATTTATTTCCTGGTCTACGTTTTTCATATACCCCATAGTATGTAACAGAATGTATCGTTTGGGCGCTTGTGCCTATAAACCTTATA	HM105539|k__Fungi;p__Basidiomycota;c__Agaricomycetes;o__Agaricales;f__Hymenogastraceae;g__Hymenogaster;s__Hymenogaster_sp|SH1184984.08FU	100	8e-122	100	HM105539	Fungi	Basidiomycota	Agaricomycetes	Agaricales	Hymenogastraceae	Hymenogaster	hebeloma-alnicola	0	0	0	0	0	0	0	0	0	0	0	0	1	0	1
OTU_931	TTGAATGAACTTGGTGTGGGTTGTCCGCTGGCCCCTTGGGGCATGTGCACACTCCACCATCCTCATCTCTCCACCTGTGCACCTCTTGTAGACTTGGTCTACGTTTTTCATATACCCCATAGCATGTAACAGAATGTATCGTATAAACCTTATA	UDB027570|k__Fungi;p__Basidiomycota;c__Agaricomycetes;o__Agaricales;f__Hymenogastraceae;g__Hymenogaster;s__Hymenogaster_sp|SH1516858.08FU	100	6e-76	100	UDB027570	Fungi	Basidiomycota	Agaricomycetes	Agaricales	Hymenogastraceae	Hymenogaster	hebeloma-alnicola	0	0	0	0	0	0	0	0	0	0	0	0	2	0	0
OTU_509	AAGAGTTGTAACAGGGTTTGATGCTGGCAGCCAATTTTTTGGATGCATGTGCTCGCCCTAACATCTTCCAAGCACCTGTGCACACTTTTGAGGGGGTTTTGAGTTGATTGCCTCTTTTGGGTGATTTTCTTTCATTCCCTTAAATTTACTATACACTGTCAGCAATGTTGAACGTGATTTGTGCCGCAAGGCCATTAATACAATA	MK627472|k__Fungi;p__Basidiomycota;c__Agaricomycetes;o__Cantharellales;f__Clavulinaceae;g__Clavulina;s__Clavulina_rugosa|SH1546102.08FU	100	4e-104	100	MK627472	Fungi	Basidiomycota	Agaricomycetes	Cantharellales	Clavulinaceae	Clavulina	clavulina	0	0	0	0	1	1	0	0	0	0	0	0	0	0	0
OTU_1117	TCGTACAAAATGTGTGAGGCATGCTAGGGCTGTCGCTGACAAAAGTCGTGCACGCCAGAGTGTCCTCTCACATTAAATCCATCTCACCCTTTTGTGCACCACCGCGTGGGCACCCTTCGGGATCGAACTGGTCCAGGAGGGGGCTTGCGTTTTCACACAAACCCTCATTTAAAAGTGTAGAATGACCCCATTTTTGCGATAACACGCAATCAATA	MK580674|k__Fungi;p__Basidiomycota;c__Agaricomycetes;o__Agaricales;f__Amanitaceae;g__Amanita;s__Amanita_porphyria|SH1519120.08FU	100	1e-109	100	MK580674	Fungi	Basidiomycota	Agaricomycetes	Agaricales	Amanitaceae	Amanita	amanita	0	0	0	1	0	1	0	0	0	0	0	0	0	0	0
OTU_1628	TTGAATGAAACTTCTGGCTGGATGCTGTTGTGCTGGCCCTTTGCGGCAATGTGCACACCCTCTGGTCATTTGTTTCTTCTGTTCCACCTGTGCACTGCCTGTAGACACACTGTGTCTATGATATTGGTTACACACACAATGTAATGCATATTGGTTGGCATATATATATATATTATATAAATA	UDB002338|k__Fungi;p__Basidiomycota;c__Agaricomycetes;o__Agaricales;f__Amanitaceae;g__Amanita;s__Amanita_nivalis|SH1212771.08FU	100	5e-88	98.91	UDB002338	Fungi	Basidiomycota	Agaricomycetes	Agaricales	Amanitaceae	Amanita	amanita	0	0	0	0	0	0	0	0	0	0	0	0	1	1	0
OTU_1005	ATGAAAAACTTTTCAAAAATAGTTTTTTTATATCCCATTGTCTACCTACCATGTTGCTTCCACTGGACCCGTTTTACCTGATGTGTGAGACCTTTGGCTTGTGTGAATAACTCAAGTCAGGGAGTTGTCGGTGGCAAGACCATTTACCAAAACTTGATTAAAAACACATTGTCTGAATCTTTTGCTTCAATATAATA	FJ626916|k__Fungi;p__Ascomycota;c__Pezizomycetes;o__Pezizales;f__Pezizaceae;g__unidentified;s__Pezizaceae_sp|SH1146204.08FU	100	8e-96	98.98	FJ626916	Fungi	Ascomycota	Pezizomycetes	Pezizales	Pezizaceae	_	terfezia-peziza	0	0	0	0	0	0	0	0	0	0	0	0	2	0	0
OTU_1091	CTGAATTGTCAACACGAGTTGCTGCTGGTCCCCAAACGGGGGCATGTGCACGCTCTGTTCACACATCCATTCACACCTGTGCACCCTCTGTAGTTCTGTGGCAGGGGGGACTCTGTCCCTCCTGCTGTGGTTCTACATCTTTACACACACTCTGTATTAAAGTCACATGGAATGTATGCCGCGTTTAACGCAATACAATA	KM247769|k__Fungi;p__Basidiomycota;c__Agaricomycetes;o__Thelephorales;f__Thelephoraceae;g__unidentified;s__Thelephoraceae_sp|SH1502542.08FU	100	4e-84	95	KM247769	Fungi	Basidiomycota	Agaricomycetes	Thelephorales	Thelephoraceae	_	tomentella-thelephora	0	0	0	0	0	0	0	0	0	2	0	0	0	0	0
OTU_1112	CTGAATTGTCGACACGAGTTGTTGCTGGTCCTCAAACGGGGGCATGTGCACGCTCTGTTTACACATCCACTCACACCTGTGCACCCTCTGTAGTTCTGTGGCATGGGGGACCCTGTCCTCCTGTTGTGGTTCTACGTCTTTACACACACTCTGTAACAAAGTCTCATGGAATGTATGCCGCGTTTAACGCAATACAATA	HE687174|k__Fungi;p__Basidiomycota;c__Agaricomycetes;o__Thelephorales;f__Thelephoraceae;g__unidentified;s__Thelephoraceae_sp|SH1502218.08FU	100	8e-101	100	KC966111	Fungi	Basidiomycota	Agaricomycetes	Thelephorales	Thelephoraceae	Tomentella	tomentella-thelephora	2	0	0	0	0	0	0	0	0	0	0	0	0	0	0
OTU_1175	CCGAACCGCCGACACGAGTTGTTGCTGGTCTCCAAACGGGGGCACGTGCACGCTCTGTTTGTGCATCCACTCACACCTGTGCACCTTCTGTGGTTCTGTGGCCTGGGGGACTTGTCCTCCTGCCGCGGTTCTGCGTCTTTACAATCACGCTGTGATAAAGTCTAATGGAATGCATGCCGCGTTTGACGCAATACAATA	JQ347220|k__Fungi;p__Basidiomycota;c__Agaricomycetes;o__Thelephorales;f__Thelephoraceae;g__unidentified;s__Thelephoraceae_sp|SH1528406.08FU	100	3e-90	96.97	KM594951	Fungi	Basidiomycota	Agaricomycetes	Thelephorales	Thelephoraceae	_	tomentella-thelephora	0	0	2	0	0	0	0	0	0	0	0	0	0	0	0
OTU_1460	CCGAATTGTCAACACGAGTTGTTGCTGGTCTTCAAACGAGGACATGTGCACGCTCTGTTTGCACATCCACTCACACCTGTGCACCCTCCGTAGTTCTACAGCCTGGGGGCTCTGTCCCCCCTGCCGTGGTTCTATGTATTTACACACACACGCTGTAATAAAGTCTCATGGAATGTATGCCGCGTTTAACGCAATACAATA	KM247715|k__Fungi;p__Basidiomycota;c__Agaricomycetes;o__Thelephorales;f__Thelephoraceae;g__unidentified;s__Thelephoraceae_sp|SH1528570.08FU	100	9e-91	96.57	KM247715	Fungi	Basidiomycota	Agaricomycetes	Thelephorales	Thelephoraceae	_	tomentella-thelephora	0	0	0	0	0	0	0	0	0	0	0	2	0	0	0
OTU_463	CCGAACTGTCGACACGAGCTGTTGCTGGCCCTCGAAAGGGGACACGTGCACGCTCTGTCTACACATCCACTCACACCTGTGCACCCTCTGTAGTTCCATGGCCTCGGGGACCCTGTTCCCTTGCTGTGGTCCTATGTATTTACACACACACAGTAACAAAGTCTCATGGAATGCATGTCGCGTTTAACGCAATACAATA	HQ445214|k__Fungi;p__Basidiomycota;c__Agaricomycetes;o__Thelephorales;f__Thelephoraceae;g__unidentified;s__Thelephoraceae_sp|SH1502298.08FU	100	7e-92	97.49	HQ445214	Fungi	Basidiomycota	Agaricomycetes	Thelephorales	Thelephoraceae	_	tomentella-thelephora	1	1	0	0	0	0	0	0	0	0	0	0	0	0	0
OTU_628	CTGAACTGTCAACATGAGTTGTTGCTGGTCCCCAGACCCCGGGGGCATGTGCACGCTCTGTTTACACATCCATCCACACCTGTGCACCCTCTGTAGTTCTATGGCCTGGGTGACTTTGTCCCCTTGCTGTGGTTCTATGTATTTACACACACACTGCCATAAAGTCTCGTGGAATGTTTGTCGCGTTTAACGCAATACAATA	KM576618|k__Fungi;p__Basidiomycota;c__Agaricomycetes;o__Thelephorales;f__Thelephoraceae;g__unidentified;s__Thelephoraceae_sp|SH1528843.08FU	99	2e-87	96.02	KM576618	Fungi	Basidiomycota	Agaricomycetes	Thelephorales	Thelephoraceae	_	tomentella-thelephora	0	0	0	0	0	0	0	0	0	0	0	0	0	0	2
OTU_708	CCGAATTGTCAACAAGAGTTGTTGCTGGTCCTCAAACAAGGGGGCACGTGCACGCTCTGTTCACACATCCACTCACACCCTGTGCACCCTCTGTAGTTCTATGGTCGGGGGGCTTGTCCTCCTGCTGTGGTTCTGCTTCTTTACACACACACTGTAACAAGTCTCATGGAATGCATGCCGCGTTTAACGCAATACAATA	HQ445384|k__Fungi;p__Basidiomycota;c__Agaricomycetes;o__Thelephorales;f__Thelephoraceae;g__unidentified;s__Thelephoraceae_sp|SH1502484.08FU	100	2e-97	99	HQ445384	Fungi	Basidiomycota	Agaricomycetes	Thelephorales	Thelephoraceae	_	tomentella-thelephora	0	0	0	0	1	1	0	0	0	0	0	0	0	0	0
OTU_733	TCGATGTTAATAATTGTCAACCTTCAGTGCTGGCTCTTGCAAGTGCACGTTGGGAGGCATATATTATCTATCCTATACCCTTTTGTGAACCACTGGCCTTTGCTGGCTTTGGCTGGCAGAGGAATTTTACACAACCACGAATGTAATGAAATTAATGTTGTTGGTGCTTTGCACTACAAAATAATA	KT275649|k__Fungi;p__Basidiomycota;c__Agaricomycetes;o__Sebacinales;f__Sebacinaceae;g__Helvellosebacina;s__Helvellosebacina_sp|SH1515905.08FU	100	6e-92	99.46	KT275649	Fungi	Basidiomycota	Agaricomycetes	Sebacinales	Sebacinaceae	Helvellosebacina	sebacina	0	0	0	0	0	0	0	0	0	0	0	0	0	2	0
OTU_873	GTGATTTTGAATCGTTACCTTCAGTGCTGGCTGGGCCCAGCTCTAGCAAGTGCACGTTGGTGACTTTCATCCATACCCCTGTGAACCTTTGGCCTCTTGTTGGCTTCGGCTGACAGAGGATTTTACACACCAACTCGAATGTAATGAAAACTACTGTTGTGCGCAAGCACTAATAATGTA	MT229536|k__Fungi;p__Basidiomycota;c__Agaricomycetes;o__Sebacinales;f__Sebacinaceae;g__unidentified;s__Sebacinaceae_sp|SH1561972.08FU	100	3e-90	100	KY684559	Fungi	Basidiomycota	Agaricomycetes	Sebacinales	Sebacinaceae	Sebacina	sebacina	0	0	0	0	0	0	0	0	0	2	0	0	0	0	0
OTU_524	TCGAATTATAATCCGACGAAGGGAATAGAGTCGGCTGTCGCTGGCCTTTCGCGAGGCATGTGCACGCTTTCTTTCCTACCTTCGTCGTATGGGCGCGGGGCGACCCGCGTCTTCATATACCTCTTCGTGTAGAAAGTCTTTGAATGTTTTTTTTTTTTTTTTACAATCGTCGAGTCGCGACTTCTAGGAGACGCGATTCTTCGAGACAAAAGTTATTA	KX213742|k__Fungi;p__Basidiomycota;c__Agaricomycetes;o__Boletales;f__Suillaceae;g__Suillus;s__Suillus_sp|SH1555210.08FU	100	4e-94	95.87	KX213742	Fungi	Basidiomycota	Agaricomycetes	Boletales	Suillaceae	Suillus	suillus-rhizopogon	0	0	0	0	1	0	0	0	0	0	0	0	0	0	0
OTU_1317	ATGATTGCGAATCGTTGCCTTCTGTGCTGGCCAGCCACTGGCAAGTGCACGTCGGTGATGTTCATCCAACACCCTGTGAACCTTTGGCCTCTTGCTAGCTTCGGCCGGCAGAGGAATTTACACAAACTCGAATGTAATGAATTTTACTGTCGTGCGCAAGCACTAATGTA	KF000539|k__Fungi;p__Basidiomycota;c__Agaricomycetes;o__Sebacinales;f__Sebacinaceae;g__Sebacina;s__Sebacina_sp|SH1521289.08FU	100	9e-85	100	KF000539	Fungi	Basidiomycota	Agaricomycetes	Sebacinales	Sebacinaceae	Sebacina	sebacina	0	0	0	0	0	0	0	0	0	0	0	0	0	0	1
OTU_794	TTGATTGCGAATCGTTGTCTGCAGTGCTGGCCAGCTCTGGCAAGTGCACGTTGGCGGCTTTTCATCCAATACCCCTGTGAACCTTTGGCCTCTTGCTGGCTCTGGCTGGCAGAGGATTTTTTACACACACTCGAATGTAATGAAATCATTGTTGTGCGCAAGCACTACTGTA	KF297076|k__Fungi;p__Basidiomycota;c__Agaricomycetes;o__Sebacinales;f__Sebacinaceae;g__Sebacina;s__Sebacina_sp|SH1148291.08FU	100	3e-84	99.42	KF297076	Fungi	Basidiomycota	Agaricomycetes	Sebacinales	Sebacinaceae	Sebacina	sebacina	0	0	0	0	0	0	1	0	0	0	0	0	0	0	0
OTU_1442	TCGTAAAATGGGGGTGCCCGGGTTGTCGCTGACTTTTTGTCGTGCACGCCCGAGTGCTCTCACATACAAATATCCATCTCACCCCTTTGTGCATCACCGCGTGCGTCCCCCCTTCCTCGGAGGGGGGTGCTCACGTTTTCACATAAAACTCGATACAGTGTAGAATGTTTATTTTTGCGGTCACACGCGATCAATA	MK575439|k__Fungi;p__Basidiomycota;c__Agaricomycetes;o__Russulales;f__Russulaceae;g__Russula;s__Russula_brevipes|SH1509930.08FU	100	1e-73	92.42	MK575439	Fungi	Basidiomycota	Agaricomycetes	Russulales	Russulaceae	Russula	russula-lactarius	0	0	0	0	0	1	0	0	0	0	0	0	0	0	0
OTU_1592	TCGTACAACCGAGGTGCGAGGGCTGTCGCTGACTTTTTTTTGTCGTGCACGCCCGAGTGCTCTCACACAATCCATCTCACCCCTATGTGCACCACCGCGTGGGTCCCTCTTTGGCTCGCTCCGAGGGGGGGCTCGCGTTTTCACACAAACTCGAAGCAGTGTAGAATGTCTTTTTATTTTGCGATGACACGCAATCAATA	KX095034|k__Fungi;p__Basidiomycota;c__Agaricomycetes;o__Russulales;f__Russulaceae;g__Russula;s__Russula_sp|SH1509018.08FU	100	2e-101	100	KX095034	Fungi	Basidiomycota	Agaricomycetes	Russulales	Russulaceae	Russula	russula-lactarius	0	0	0	0	0	1	0	0	0	0	0	0	0	0	0
OTU_498	TCGTATAACTGAGGCACGAGGGCTGTCGCTGACTTTGTGTCGTGCACGCCCGAGTGCTCTCAAACATCCATCTCACCCCTATGTGCACCACCGCGTGGGTTCCCTTTTGGCTCGTTCAGAGGGGGGCTCGCGTTTTCACACAAACTCGATACAGTGTAGAATGTCTTCCTTTGCGATAACACGCAATTAATA	UDB036958|k__Fungi;p__Basidiomycota;c__Agaricomycetes;o__Russulales;f__Russulaceae;g__Russula;s__Russula_citrinochlora|SH1509076.08FU	100	3e-95	99.48	UDB036958	Fungi	Basidiomycota	Agaricomycetes	Russulales	Russulaceae	Russula	russula-lactarius	0	0	0	1	0	0	0	0	0	0	0	0	0	0	0
OTU_819	TCGTACAACGGGGGTGCGAGGGCTGTCGCTGACCTTTCAAAAGGTCGTGCACGCCCGAGCGCTCTCACACATCCATCTCACCCCTTTGTGCATCACCGCGTGGGTCCCCCTTTGCAGGAGGGCTCACGTTTTCACACAAAACTTGATACAGTGTAGAATGTTTTTTCTTTTCTTTTGCGGTCACACGCAATCAATA	LC192788|k__Fungi;p__Basidiomycota;c__Agaricomycetes;o__Russulales;f__Russulaceae;g__Russula;s__Russula_risigallina|SH1538849.08FU	100	7e-82	95.41	LC192788	Fungi	Basidiomycota	Agaricomycetes	Russulales	Russulaceae	Russula	russula-lactarius	0	0	0	0	0	1	0	0	0	0	0	0	0	0	0
OTU_929	TCATACAACTGAGGTGCAAAGGCTGTCGCTGACTTTTCGTCGTGCACGCCCGAGTGCTCTCAAACATATCCATCTCACCCCTGTGCACCACCGCGTGGGTTCCCTTTTGGCTCGTTCCGAGGGGGGGCTCGCGTTTTCACACAAACTTGATACGGTATAGAATGTCTTTGTTTGCGATCACACGCAATTAATA	UDB035881|k__Fungi;p__Basidiomycota;c__Agaricomycetes;o__Russulales;f__Russulaceae;g__Russula;s__Russula_clusii|SH1509016.08FU	100	2e-97	100	UDB035881	Fungi	Basidiomycota	Agaricomycetes	Russulales	Russulaceae	Russula	russula-lactarius	0	0	0	0	1	0	0	0	0	0	0	0	0	0	0
OTU_1601	TCGTAACAAAAAATGTGTTAGAGGCGTGCAAGGGCTGTCGCTGACTTTTAACGCAAAAGTCGTGCACGCCGGAGTGCGTCCTCTACACATAAAATCCATCTCACCCTTTTGTGCACCACCGCGTGGGCACCCTTCGGGATCAAACCGATCCAGGAAGGGGGCTTGCGTTTTCATACAAACCCCTTTTTAAAAGTGTAGAATGACCCCATTTTTTTTTGCGATAACACGCAATCAATA	GQ223451|k__Fungi;p__Basidiomycota;c__Agaricomycetes;o__Russulales;f__Russulaceae;g__Lactarius;s__Lactarius_sp|SH1519113.08FU	100	8e-122	100	GQ223451	Fungi	Basidiomycota	Agaricomycetes	Russulales	Russulaceae	Lactarius	russula-lactarius	0	0	0	0	0	0	0	0	0	0	0	1	0	0	0
OTU_1683	TCGTACAAAATGTGTGAGGCATGCAAGGGTTGTCGCTGACTTTTAACACAAAAGTCGTGCACGCCGGAGTGTGTCCTCTCACATAAAATCCATCTCACCCTTTTGTGCACCACCGCGTGGGCACCCTTCAGGATCGAGCCGATCCGGGAGGGGGCTTGCGTTTTCACACAAACCCCCCCTTTTAAAAGTGTAGAATGACCCCATTTTTGCGATAACACGCAATCAATA	UDB037176|k__Fungi;p__Basidiomycota;c__Agaricomycetes;o__Russulales;f__Russulaceae;g__Lactarius;s__Lactarius_resimus|SH1519107.08FU	100	7e-117	100	UDB037176	Fungi	Basidiomycota	Agaricomycetes	Russulales	Russulaceae	Lactarius	russula-lactarius	0	0	0	1	0	0	0	0	0	0	0	0	0	0	0
OTU_676	TCGTACAAAATGTGTGAGGCGTGCAAGGGCTGTCGCTGACTTTTAACGCAAAAGTCGTGCACGCCGGAGCGTGTCCTCTCACATAAAATCCATCTCACCCTTTTGTGCACCACCGCGTGGGCACCCTTCGGGATCAAACCGATCCCGGAGGGGGCTTGCGTTTTCACACAAACCCCTTCTTAAAAGTGTAGAATGTCCCCATTTTTGCGATAACACGCAATCAATA	UDB035930|k__Fungi;p__Basidiomycota;c__Agaricomycetes;o__Russulales;f__Russulaceae;g__Lactarius;s__Lactarius_torminosus|SH1519117.08FU	100	9e-116	100	UDB035930	Fungi	Basidiomycota	Agaricomycetes	Russulales	Russulaceae	Lactarius	russula-lactarius	0	0	0	0	0	0	0	1	0	0	0	0	0	0	0
OTU_1318	TTGAAATTATAGGCGAGGGTTGTAGCTGGCCTCTCGGGGCATGTGCACGCCCGAGCCCTTAATCCACACACACCTGTGAACCTATTGTAAGGGCCCGTGAAAAGGCCTTTACGTCTTTATAAACCCATCGTATGTCTCATAGAATGTAATTATATGTCCTCGCCTTAAAAAAGCGTTGATAAACTTATA	KP814367|k__Fungi;p__Basidiomycota;c__Agaricomycetes;o__Atheliales;f__Atheliaceae;g__Piloderma;s__Piloderma_olivaceum|SH1544821.08FU	100	3e-95	100	KP814367	Fungi	Basidiomycota	Agaricomycetes	Atheliales	Atheliaceae	Piloderma	piloderma	0	0	0	0	0	1	0	0	0	0	0	0	0	0	0
OTU_1977	TCGAAATTATCGGTGAGGGTTGTAGCTGGCCTTTCGGGGCACGTGCACGCCCGAGCCCTTTAATCCACTTTACACCTGTGAACCTAATGTAGGTCGCCCCTCGAAAAGGTGGCCTACGTCTTATCATCAACCCATCGTATGTCTCATAGAATGTAAATCAATATCCTCGCCTTAAAAAAGCGTTGATAAACTTTATA	KF359610|k__Fungi;p__Basidiomycota;c__Agaricomycetes;o__Atheliales;f__Atheliaceae;g__Piloderma;s__Piloderma_sp|SH1544823.08FU	100	1e-99	100	KF359610	Fungi	Basidiomycota	Agaricomycetes	Atheliales	Atheliaceae	Piloderma	piloderma	0	0	0	1	0	0	0	0	0	0	0	0	0	0	0
OTU_2035	TCGAAATTATAGGCGAGGGTTGTAGCTGGCCTCCCGGGGCACGTGCACGCCCGAGCCCTTAATCCACACACACCTGTGAACCTATTGTAAGGGCCCGTGAAAAGGCCTTTACGTTTTATCATCAACCCATCGTATGTCTCATAGAATGTAAATATATGTCCTCGCCTTAAAAAGCGTTGATAAACTTATA	KJ769281|k__Fungi;p__Basidiomycota;c__Agaricomycetes;o__Atheliales;f__Atheliaceae;g__Piloderma;s__Piloderma_sp|SH1544811.08FU	100	8e-86	96.86	KJ769281	Fungi	Basidiomycota	Agaricomycetes	Atheliales	Atheliaceae	Piloderma	piloderma	0	0	0	0	1	0	0	0	0	0	0	0	0	0	0
OTU_833	ATGTAACCGGACCTTACGGGTGCCGTAAAACGCATTCGTTCGGAAAGGGAGATATCATACACCCTGTGTTTATTTACTTTTGTTGCTTTGGCGGGCCGTCCTTTTAGGCGTCGGCCCCGGCTGATCGTGCCCGCCAGAGAACCCAAACTCTTTTATTAGTGATGTCTGAGTACTATATAATAGTTA	KF617247|k__Fungi;p__Ascomycota;c__Leotiomycetes;o__Helotiales;f__Helotiaceae;g__Meliniomyces;s__Meliniomyces_sp|SH1172182.08FU	100	1e-93	100	KF617247	Fungi	Ascomycota	Leotiomycetes	Helotiales	Helotiaceae	Meliniomyces	meliniomyces	0	0	0	0	0	1	0	0	0	0	0	0	0	0	0
OTU_622	TTGAATAAACCTGATGTGATTGTTAGCTGGCTTTTCGAAGCATGTGCTCGTCTGTCATCTTTATCTCTCCACCTGTGCACATTTTGTAGTCTTGGATACCTCTCGAGGAAACTCGGATTTTAGGATCGCTGTGCTGTACAAGTCGGCTTTTCTTTCATTTCCAAGACTATGTTTTTATATACACCAAAGTATGTTTATAGAATGTCATCAATGGGAACTTGTTTCCTATAAAATTATA	KF617846|k__Fungi;p__Basidiomycota;c__Agaricomycetes;o__Agaricales;f__Hydnangiaceae;g__Laccaria;s__Laccaria_sp|SH1553002.08FU	100	2e-122	100	KF617846	Fungi	Basidiomycota	Agaricomycetes	Agaricales	Hydnangiaceae	Laccaria	laccaria	0	0	0	1	0	0	0	0	0	0	0	0	0	0	0
OTU_1058	TCGAATAAACTTGGAACAGGCTGTTGCTGATCCCTCTTCGGGGGGGGAATACGTGCACGCTTGTCTCATCTTTTTCATTTTCCCCAACTGTGCACATCTTGTAGACCCTGGAGCTTTATGAATTTTCATTCGAGTCGGGACTGCTGTGCCTCCTTTGAGGTCGGCTTTTCCTTGCATCTCCAGGGTCTATGTTATTTCTTCACGATCTCTCAAATGTGTTTAGAATGTCGAATCAGGTGCTTTTGCACCTATATAAATGAAAAAGTA	JX436915|k__Fungi;p__Basidiomycota;c__Agaricomycetes;o__Agaricales;f__Inocybaceae;g__Inocybe;s__Inocybe_sp|SH1529141.08FU	99	9e-122	96.97	JX436915	Fungi	Basidiomycota	Agaricomycetes	Agaricales	Inocybaceae	Inocybe	inocybe	0	0	0	0	0	0	0	1	0	0	0	0	0	0	0
OTU_1181	TAGAAATAAAACTGAACAGGCTGTTTGCTGGTCCTCTCGAGGGCATGTGCACGCCTGTCATCTTTATTCTTCCAACCGTGCACATATTGTAGGCCTGGAGTTTCTTCTTATCATTCGAATAGATTGAGGACTGCCGTCGAGGCTTTGCCTTGTGATTCCAGGTCTATGTTGTAATACATTTTCACAACGTGTTTAAGAATGTTGAGTACTGGGGATAACAAATATA	JN580830|k__Fungi;p__Basidiomycota;c__Agaricomycetes;o__Agaricales;f__Inocybaceae;g__Inocybe;s__Inocybe_bufonia|SH1543394.08FU	100	2e-112	99.12	JN580830	Fungi	Basidiomycota	Agaricomycetes	Agaricales	Inocybaceae	Inocybe	inocybe	0	0	0	1	0	0	0	0	0	0	0	0	0	0	0
OTU_1189	TTGAATAAAAAACTTGATAGGCTGTTGCTGGCCCCTTCTTAGGGTAGTGTGCACGCTTGTCATTTATTTATCCACCTGTGCACCTTTTTGTAGACCTTAGAATTTTGGGACTGCTGTGCCTGTGGCCAGCTTTTCCTTGTTTCTCTCTAGGTTCTATGTTCCTCACATACTCCTATGAATGTAATAGAATGTTGATCTGCCCATAAAGTTATATA	KX499163|k__Fungi;p__Basidiomycota;c__Agaricomycetes;o__Agaricales;f__Inocybaceae;g__Inocybe;s__Inocybe_sp|SH1184854.08FU	100	2e-102	97.67	KX499163	Fungi	Basidiomycota	Agaricomycetes	Agaricales	Inocybaceae	Inocybe	inocybe	0	0	0	0	0	0	0	0	0	0	0	0	1	0	0
OTU_1469	TTGAAATAGCATGATGAGTTGTCGCTGGCCTTTTCTTTGACTGTGCACGCTCTGTCGTCCTTCATTTCTCCATCTATTTGTGCACCTCTTGCGTAGACCTTTTCTGAGGGCTACTATGGGTCATTAGGACTGCTTTGTAAAAAAATGAATTTGTGGGCTTTCCTTGTCGCTACCACACACATACACCAGTGTAATTGTTTAGAAGGAAATGGAAATTGATGCATAATA	MH578021|k__Fungi;p__Basidiomycota;c__Agaricomycetes;o__Agaricales;f__Inocybaceae;g__Inocybe;s__Inocybe_lanatodisca|SH1553919.08FU	100	1e-95	94.32	MH578021	Fungi	Basidiomycota	Agaricomycetes	Agaricales	Inocybaceae	Inocybe	inocybe	0	0	0	0	0	0	0	0	0	0	0	0	0	0	1
OTU_1508	TTGAATAAACTTGAACAGGCTGTTGCTGGGCTCCTTCAAAGGGGGTGTTGTGCACGCTTGTCATCTTTATCTCTCCAACTGTGCACATATTGTAGACCTGGGAGTTGTTTGATTTGTTTCGAGTTGGGACTGCTGTGCTTTTACAAGTCAGCTTTGCCTTGAATTTTCGGGTCTATGTCTTATTCACAAACCTATGAATTTGTTTTGAATGTTGAATCAGGTCCTTTTGTACCTATAAAGTTAAATATA	KJ810596|k__Fungi;p__Basidiomycota;c__Agaricomycetes;o__Agaricales;f__Inocybaceae;g__Inocybe;s__Inocybe_leptocystis|SH1647006.08FU	100	2e-128	100	KJ810596	Fungi	Basidiomycota	Agaricomycetes	Agaricales	Inocybaceae	Inocybe	inocybe	0	1	0	0	0	0	0	0	0	0	0	0	0	0	0
OTU_1787	TTGAATAAATGTGATAGGTTGTTGCTGGCTCTCCTTTACAAAGGGGGGGCATGTGCACACTTGTTGTCTTTATTTTTCCACCTGTGCACTTTTTGTAGACCCTAGAGAAGTGGTTGTCTGATAAAATCAGATAGATTGAGGACTGCTGTGTCTTTCAAAGAGGCCAGCTTTGCCTTGTGTATCTAGGTTCTATGTCATTCACATACTCCTATAAATGTAATAGAATGTTGACCTGGGTCTTTGTACCTATAAAGTTATATA	HQ604623|k__Fungi;p__Basidiomycota;c__Agaricomycetes;o__Agaricales;f__Inocybaceae;g__Inocybe;s__Inocybe_sororia|SH1527778.08FU	100	3e-116	95.45	HQ604623	Fungi	Basidiomycota	Agaricomycetes	Agaricales	Inocybaceae	Inocybe	inocybe	0	0	0	0	0	1	0	0	0	0	0	0	0	0	0
OTU_1838	TTGAATCAATGTGATAGGCTGTTGCTGGCTTCCCTGCCAAAGGGGGACATGTGCACGCCTGTCATTTTTGTTTTTCCACCTGTGCACACTTTGTAGAATCCTAGAGAAGCAATTGTCTGAGAAAATCAGATAGGTTGAGGACTGCTGTGTGCCTTTCAATGGGGCCAGCTTTGCCTTGTGTATCTAGGTTCTATGTCATTCACATACTCCTATGAATGTAACAGAATGTTGACCTGGGTCTTTAGCACCTATAAAAGTTATATA	FJ553334|k__Fungi;p__Basidiomycota;c__Agaricomycetes;o__Agaricales;f__Inocybaceae;g__Inocybe;s__Inocybe_sp|SH1231996.08FU	100	7e-123	96.98	FJ553334	Fungi	Basidiomycota	Agaricomycetes	Agaricales	Inocybaceae	Inocybe	inocybe	0	0	0	0	0	0	0	0	1	0	0	0	0	0	0
OTU_690	TCGAAATAAACCCGAGCAGGCTGTTTGCTGGTCCTCCATGTGGGGGACATGTGCACGCTTGTCGTCTTTATTTTTCCAACTGTGCACATATTGTAGACCTGGAGCTTTCTTATCGTTTGAATAGATTGAGGACTGCCATGTAAATGTGGCTTTGCCTTGCATTTCCAGGTCTATGTTGTAATACATTTTCACAACGTGTTTCAGAATGTCGAGTACCGGGGATAACAAATATA	JN580878|k__Fungi;p__Basidiomycota;c__Agaricomycetes;o__Agaricales;f__Inocybaceae;g__Inocybe;s__Inocybe_pseudoteraturgus|SH1543393.08FU	100	1e-115	99.14	JN580878	Fungi	Basidiomycota	Agaricomycetes	Agaricales	Inocybaceae	Inocybe	inocybe	0	0	0	1	0	0	0	0	0	0	0	0	0	0	0
OTU_745	TTGAATAAACATTTGATAGGCTGTTGCTGGCCCCCCTCTGGGGTAGTGTGCACGCTTGTCATTCATTTATTTATTTCCACCTGTGCACCTTTTTGTAGACCCTTAGAGAAAGCAAATCAATTGTTTCGAGCAATTGGGATAGGGACTGCTGTGCTGTGAAGTGCCAGCTTTTCCTTGTTTCTCTAGGTTCTATGTTATTCACATACTCCTATGAATGTAATAGAATGTTGATCTGGGTCTTTGATGCCCATAAAGTTATATA	LC013766|k__Fungi;p__Basidiomycota;c__Agaricomycetes;o__Agaricales;f__Inocybaceae;g__Inocybe;s__Inocybe_sp|SH1184844.08FU	100	2e-127	98.11	LC013766	Fungi	Basidiomycota	Agaricomycetes	Agaricales	Inocybaceae	Inocybe	inocybe	1	0	0	0	0	0	0	0	0	0	0	0	0	0	0
OTU_485	TTGAATGAACTTGGTGTGGTTGTTGCTGGTCCTTTCGGGGGCATGTGCACGCCCACCATCCTCATCTCTCCACCTGTGCACCTCTTGTAGACTTGGATTGACTTTCCGAGGCAACTCGGTCGGGAGGATTGCTGGCATCAGCTGGCTTTCTTTGCATTTCCGGGTCTACGTTTTTCATATACCCCATTGTATGTAACAGAATGTAATATTGGGCCCTTGTGCCTATAAACCTTATA	MH795029|k__Fungi;p__Basidiomycota;c__Agaricomycetes;o__Agaricales;f__Hymenogastraceae;g__Hebeloma;s__Hebeloma_sp|SH1563975.08FU	100	3e-121	100	MH795029	Fungi	Basidiomycota	Agaricomycetes	Agaricales	Hymenogastraceae	Hebeloma	hebeloma-alnicola	1	0	0	0	0	0	0	0	0	0	0	0	0	0	0
OTU_1018	TTGAAATAAACCTGATGGGTTGTTGCTGGCTCTCTAGGGAGCATGTGCACACCTTGTCATCTTTATATTTCCACCTGTGCACCTTTTGTAGACCCTCCCAGGTCTATGTTTGCTTCATTTACCCCTGATGTATGTTAATAGAATGTTGTGCCTATAAAATATATA	MK234569|k__Fungi;p__Basidiomycota;c__Agaricomycetes;o__Agaricales;f__Cortinariaceae;g__Cortinarius;s__Cortinarius_paragaudis|SH1556101.08FU	100	5e-82	100	MK234569	Fungi	Basidiomycota	Agaricomycetes	Agaricales	Cortinariaceae	Cortinarius	cortinarius	0	0	0	0	0	1	0	0	0	0	0	0	0	0	0
OTU_1113	TTGAAATAAACCTGATGGGTTGTTGCTGGCTCTCTCGGGAGCATGTGCACACCTTGTCATCTTTATATTTCCACCTGTGCACCTTTTGTAGACCCTCTCCAGGTCTATGTTGCTTCATTTACCCCCAATGTATGTTAATAGAATGTTGTGCCTATGAAATCTATA	MF139759|k__Fungi;p__Basidiomycota;c__Agaricomycetes;o__Agaricales;f__Cortinariaceae;g__Cortinarius;s__Cortinarius_roseoarmillatus|SH1556107.08FU	100	5e-82	100	MF139759	Fungi	Basidiomycota	Agaricomycetes	Agaricales	Cortinariaceae	Cortinarius	cortinarius	0	0	0	0	0	1	0	0	0	0	0	0	0	0	0
OTU_1315	TTGAAATAAACCTGATGGGTTGTTGCTGGTTCTCTAGGGAGCATGTGCACACTTGTCATCTTTATATCTCCACCTGTGCACCTTTTGTAGACCTTACAGGTCTATGTTGCCTATTCATTTACACCAATGTATGTTAATAGAATGTTGTGACTATAAAATCTATA	KP241017|k__Fungi;p__Basidiomycota;c__Agaricomycetes;o__Agaricales;f__Cortinariaceae;g__Cortinarius;s__Cortinarius_venustus|SH1545321.08FU	100	2e-81	100	KP241017	Fungi	Basidiomycota	Agaricomycetes	Agaricales	Cortinariaceae	Cortinarius	cortinarius	0	0	0	0	0	1	0	0	0	0	0	0	0	0	0
OTU_1427	TTGAAATAAACTTGATGAGTTGTTGCTGGTTCTCTAGGGAGCATTGTGCACACTTGTCATCTTTATATCTCCACCTGTGCACCTTTTGTAGACCTGGAAATATTTTTCTGAGTGCTTTAGTTAGCTACTTAGGTTTGAGGAATTTAATTTCCTTGCATTTCCCAGGTCTATGTTTCTTCATACACCCTTAAATATCTTGGAATGTAATCAAATGGGCCTTTGTGCCTATAAAATTATA	KY462582|k__Fungi;p__Basidiomycota;c__Agaricomycetes;o__Agaricales;f__Cortinariaceae;g__Cortinarius;s__Cortinarius_sp|SH1142014.08FU	100	2e-63	85.6	KY462582	Fungi	Basidiomycota	Agaricomycetes	Agaricales	Cortinariaceae	Cortinarius	cortinarius	1	0	0	0	0	0	0	0	0	0	0	0	0	0	0
OTU_1667	TTGAAATAAACCTGATGGGTTGTTGCTGGCTCTCTAGGGAGCATGTGCACGCCTTGTCATTTTTATATCTCCACCTGTGCACATTTTGTAGACCCAGGGATATCTTTCCAGGGGTCTATGTTGCTTCTTCATTTACCCCAATGTATGTCAATAGAATGTTGTGCCCATGATAAAAATCTATA	KY287743|k__Fungi;p__Basidiomycota;c__Agaricomycetes;o__Agaricales;f__Cortinariaceae;g__Cortinarius;s__Cortinarius_gentilis|SH1545387.08FU	100	1e-89	99.45	KY287743	Fungi	Basidiomycota	Agaricomycetes	Agaricales	Cortinariaceae	Cortinarius	cortinarius	0	0	0	0	0	1	0	0	0	0	0	0	0	0	0
OTU_571	TTGAAATAAACCTGATGGGTTGTTGCTGGTTCTCTAGGGAGCATGTGCACGCCTTGTCATCTTTATATCTCCACCTGTGCACCTTTTGTAGACCTTCCAGGTCTATGTTGCTCCATTTACCCCAATGTATGTTAATAGAATGTTGTGTTTATAAAATCTATA	UDB038284|k__Fungi;p__Basidiomycota;c__Agaricomycetes;o__Agaricales;f__Cortinariaceae;g__Cortinarius;s__Cortinarius_impennoides|SH1545227.08FU	100	2e-80	100	UDB038284	Fungi	Basidiomycota	Agaricomycetes	Agaricales	Cortinariaceae	Cortinarius	cortinarius	0	0	0	0	1	0	0	0	0	0	0	0	0	0	0
OTU_613	TTGAAATAAACCTGATGGGTTGCTGCTGGTTCTCTAGGGAGCATGTGCACACCTTGTCATCTTTATATCTCCACCTGTGCACTTTTTGTAGACCTGAAAAGGTCTATGTTGCTTCATTTTACCCCAATTGTATGTCAATAGAATGTTGTGCCTATATAATATATA	UDB024951|k__Fungi;p__Basidiomycota;c__Agaricomycetes;o__Agaricales;f__Cortinariaceae;g__Cortinarius;s__Cortinarius_sp|SH1545284.08FU	100	5e-82	100	UDB024951	Fungi	Basidiomycota	Agaricomycetes	Agaricales	Cortinariaceae	Cortinarius	cortinarius	0	0	0	0	1	0	0	0	0	0	0	0	0	0	0
OTU_1287	ATGAGTTGTGATGGGGTTTGATGCTGGCAGCCAATTTTTGGATGCATGTGCTTGCCCTAACAATCATCTTCCAAACACCTGTGCACACTTTTGAGGGAATTTTGAGTTGATTGCCGCTTTTGGGATGATCTTCTTGCATTCCCTTAAATTATTATACACTGTAAACAATGCTGAACGTGCTCCGTGCCGCGAGGCCATTAATATAATA	MH930237|k__Fungi;p__Basidiomycota;c__Agaricomycetes;o__Cantharellales;f__Clavulinaceae;g__Clavulina;s__Clavulina_sp|SH1546091.08FU	100	4e-104	99.52	MH930237	Fungi	Basidiomycota	Agaricomycetes	Cantharellales	Clavulinaceae	Clavulina	clavulina	0	0	0	0	0	0	0	0	0	0	0	0	0	0	1
OTU_1423	TTGATAGAACTTTTCCAAGTTTCTTCATATTCCCTGTTTATATCAACTACGTTTCTTCCATCGGACAGGTCTTTTAGGACCCTCTAGCTTGAGTAAATGCACTTGCTGGGGAGTTGCCGGTGGCGTTTCTAATAAAAAACTTTTTGTCAATCATGAACTGTCTGAACTACTTTCAAATGAAATA	MK895520|k__Fungi;p__Ascomycota;c__Pezizomycetes;o__Pezizales;f__Pezizaceae;g__unidentified;s__Pezizaceae_sp|SH1549216.08FU	90	3e-50	88.44	FJ788737	Fungi	Ascomycota	Pezizomycetes	Pezizales	Pezizaceae	Peziza	terfezia-peziza	0	0	0	0	0	0	0	0	1	0	0	0	0	0	0
OTU_1888	TTGAACAACTATCCTAGTTTTTTATATCCTATTGCTTACCTACCCTGTTGCTTCTACTGGACTTGTTTTACCTTCTTCAGGTAAGACCTCAGGCTTGTGTAAACTACACTTGTCAGAGAGCTGCCAGTAGTAAGACCACTTATAAAAACTTGTGTGGAAATATATTGTCTGAATTTTTTGTCTTGAATGAAATA	MF352739|k__Fungi;p__Ascomycota;c__Pezizomycetes;o__Pezizales;f__Pezizaceae;g__unidentified;s__Pezizaceae_sp|SH1630805.08FU	100	5e-88	96.91	LC013889	Fungi	Ascomycota	Pezizomycetes	Pezizales	Pezizaceae	Peziza	terfezia-peziza	0	0	0	0	0	0	0	0	0	0	0	1	0	0	0
OTU_1194	CCGAATCGTCAAACACGGGTTGTTGCTGGCCCCCAAAAGGGGCATGTGCACGCTCTGTTTACACATCCACTCACACCTGTGCACCCTCTGTAGTTCTATGGTTCGGAAGACCCCGTCTTCCTTCCGTAGCTCTACGTCTTTACACACACACTGTAGTGACGTCTCATGGAATGTTTTTATGCGTTTAACGCGACACAATA	UDB026508|k__Fungi;p__Basidiomycota;c__Agaricomycetes;o__Thelephorales;f__Thelephoraceae;g__unidentified;s__Thelephoraceae_sp|SH1502249.08FU	100	1e-99	99.5	UDB026508	Fungi	Basidiomycota	Agaricomycetes	Thelephorales	Thelephoraceae	_	tomentella-thelephora	0	0	0	0	0	0	0	0	0	0	0	0	0	0	1
OTU_1264	CTGAATTGTCAACAAGAGTTGTTGCTGGTCCTCAAATGGGGGCATGTGCACACTCTGTTCACACATCCACTCACACCCTGTGCACCCTCTGTAGTTCTATGGTTGGGGGACCTGTCCTCCTGCTGTGGTTCTGCGTCTTTACACACACATTGTAACAAAGTCTCATGGAATGCATGTCGCGTTTAACGCAATACAATA	JQ975990|k__Fungi;p__Basidiomycota;c__Agaricomycetes;o__Thelephorales;f__Thelephoraceae;g__unidentified;s__Thelephoraceae_sp|SH1502647.08FU	100	1e-98	99.49	JQ975990	Fungi	Basidiomycota	Agaricomycetes	Thelephorales	Thelephoraceae	_	tomentella-thelephora	0	0	0	1	0	0	0	0	0	0	0	0	0	0	0
OTU_810	CCGAATTGTCAACAAGGGTTGTTGCTGGTCCTCGAACAGGGGGACATGTGCACGCTCTGTTCACACATCCACTCACACCATGTGCACCCTCTGTAGTTCTATGGTCGGGGGGCCTGTCCTCCTGCTGTGGTTCTGCTTCTTTACACACACACCGTAACAAAGTCTCATGGAATGCATGCCGCGTTTAACGCAATACAATA	KP403041|k__Fungi;p__Basidiomycota;c__Agaricomycetes;o__Thelephorales;f__Thelephoraceae;g__unidentified;s__Thelephoraceae_sp|SH1502281.08FU	100	3e-100	99.5	KP403041	Fungi	Basidiomycota	Agaricomycetes	Thelephorales	Thelephoraceae	_	tomentella-thelephora	0	0	0	1	0	0	0	0	0	0	0	0	0	0	0
