# Supplementary material for: Stochastic processes dominate the community assembly of ectomycorrhizal fungi associated with Betula platyphylla in Inner Mongolia, China
Source: PeerJ. 2025 May 19;13:e19364. doi: 10.7717/peerj.19364 (PMC12097238; doi:10.7717/peerj.19364)
Supplement: Supplemental Information 4 — A total of 30 lineages were found in 15 soil samples of five sites in this study. [file peerj-13-19364-s004.xlsx]

## Sheet: lineage_Relative abundance
	ELST	GH	HDM	HLS	WLB
amanita	0	0.000490918	0.000245459	0	0.223859
amphinema.tylospora	0.00245459	0	0.00245459	0.0193913	0
cantharellus	0	0	0	0	0.00220913
ceratobasidium1	0	0	0	0	0
ceratobasidium2	0	0	0	0.00196367	0.000490918
ceratobasidium3	0	0	0.000736377	0	0
clavulina	0.0463918	0.011782	0.0250368	0.0127639	0.0552283
cortinarius	0.0864016	0.0814924	0.524055	0.0846834	0.0952381
elaphomyces	0	0	0	0	0
galactinia	0.00368189	0	0	0.00589102	0
genea.humaria	0.0135002	0	0	0	0
hebeloma.alnicola	0.00490918	0.000736377	0.00760923	0.00270005	0.0196367
hygrophorus	0.126166	0.28866	0	0	0
inocybe	0.0589102	0.0284732	0.0927835	0.018164	0.264359
laccaria	0	0.00147275	0	0	0
marcelleina.peziza	0	0	0	0.000736377	0
meliniomyces	0	0.000736377	0	0.0171821	0
otidea	0.0162003	0	0	0	0
paxillus.gyrodon	0	0	0	0.00171821	0
piloderma	0	0.0991654	0.00441826	0.0245459	0.00760923
pseudotomentella	0.00613648	0.000736377	0.000736377	0.0338733	0
pustularia	0	0	0	0.0105547	0.00319097
russula.lactarius	0.581001	0.38758	0.152676	0.04811	0.16323
sebacina	0.0306824	0.0834561	0.124939	0.579529	0.114384
serendipita1	0	0.000736377	0	0	0
suillus.rhizopogon	0	0.00662739	0	0	0.000245459
terfezia.peziza	0.00220913	0	0.00368189	0.0596465	0.0100638
tomentella.thelephora	0.017673	0.00294551	0.0522828	0.0785469	0.0402553
tomentellopsis	0	0.000981836	0	0	0
tricholoma	0.00368189	0.000981836	0.00785469	0	0
tuber.helvella	0	0	0.000490918	0	0
wilcoxina	0	0.00294551	0	0	0

## Sheet: Sheet1
EM fungal lineage	ELST(%)	GH(%)	HDM(%)	HLS(%)	WLB(%)	Total(%)
/Russula-Lactarius	58.1	38.76	15.27	4.81	16.32	26.65
/Sebacina	3.07	8.35	12.49	57.95	11.44	18.66
/Cortinarius	8.64	8.15	52.41	8.47	9.52	17.44
/Inocybe	5.89	2.85	9.28	1.82	26.44	9.25
/Hygrophorus	12.62	28.87	-	-	-	8.3
/Amanita	-	0.05	0.02	-	22.39	4.49
/Tomentella-Thelephora	1.77	0.29	5.23	7.85	4.03	3.83
/Clavulina	4.64	1.18	2.5	1.28	5.52	3.02
/Piloderma	-	9.92	0.44	2.45	0.76	2.71
/Terfezia-Peziza	0.22	-	0.37	5.96	1.01	1.51
/Pseudotomentella	0.61	0.07	0.07	3.39	-	0.83
/Hebeloma-Alnicola	0.49	0.07	0.76	0.27	1.96	0.71
/Amphinema-Tylospora	0.25	-	0.25	1.94	-	0.49
/Meliniomyces	-	0.07	-	1.72	-	0.36
/Otidea	1.62	-	-	-	-	0.32
/Genea-Humaria	1.35	-	-	-	-	0.27
/Pustularia	-	-	-	1.06	0.32	0.27
/Tricholoma	0.37	0.1	0.79	-	-	0.25
/Galactinia	0.37	-	-	0.59	-	0.19
/Suillus-Rhizopogon	-	0.66	-	-	0.02	0.14
/Wilcoxina	-	0.29	-	-	-	0.06
/Ceratobasidium2	-	-	-	0.2	0.05	0.05
/Cantharellus	-	-	-	-	0.22	0.04
/Laccaria	-	0.15	-	-	-	0.03
/Paxillus-Gyrodon	0	-	-	0.17	-	0.03
/Tomentellopsis	-	0.1	-	-	-	0.02
/Ceratobasidium3	-	-	0.07	-	-	0.01
/Marcelleina-Peziza	-	-	-	0.07	-	0.01
/Serendipita1	-	0.07	-	-	-	0.01
/Tuber-Helvella	-	-	0.05	-	-	0.01
