# Supplementary material for: Stochastic processes dominate the community assembly of ectomycorrhizal fungi associated with Betula platyphylla in Inner Mongolia, China
Source: PeerJ journal article supplement (doi:10.7717/peerj.19364), 2025-05-19
Supplement: Supplementary_Figue_1.pdf [file Supplementary_Figue_1.pdf]

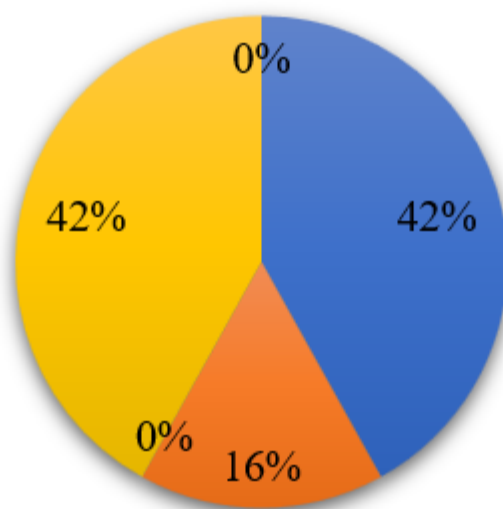

- ecological drift
- homogenizing dispersal
- homogeneous selection
- dispersal limitation
- variable selection
